# Supplementary material for: Silicon–nitrogen bond formation via dealkynative coupling of amines with bis(trimethylsilyl)acetylene mediated by KHMDS
Source: Royal Society of Chemistry journal article supplement (doi:10.1039/d2cc04413g), 2022-01-01

## Supporting Information

# **Silicon–Nitrogen Bond Formation via Dealkynative Coupling of Amines with Bis(trimethylsilyl)acetylene Mediated by KHMDS**

Krzysztof Kuciński,<sup>\*[a]</sup> and Grzegorz Hreczycho<sup>[a]</sup>

<sup>[a]</sup> Dr. K. Kuciński, Prof. Dr. G. Hreczycho  
Department of Chemistry and Technology of Silicon Compounds  
Faculty of Chemistry, Adam Mickiewicz University in Poznań  
Uniwersytetu Poznańskiego 8, 61–614 Poznań (Poland)

E-mail: [kucinski.k@amu.edu.pl](mailto:kucinski.k@amu.edu.pl)

# CONTENT

|                                                                      |    |
|----------------------------------------------------------------------|----|
| GENERAL INFORMATION                                                  | 4  |
| GENERAL SYNTHETIC PROCEDURES                                         | 5  |
| KHMDS-CATALYZED N–H SILYLATION OF SEVERAL PRIMARY AMINES             | 5  |
| Compounds 3a-3n and 5a-5f                                            | 5  |
| Compound 3o                                                          | 5  |
| Compound 3p                                                          | 5  |
| KHMDS-CATALYZED SCALED UP N–H SILYLATION OF 3m.                      | 5  |
| KHMDS-CATALYZED N–H SILYLATION OF 3m IN THE PRESENCE OF TEMPO        | 6  |
| KHMDS-CATALYZED N–H SILYLATION OF 3m IN THE PRESENCE OF 18-CROWN-6   | 6  |
| KHMDS-CATALYZED N–H SILYLATION OF 3m IN THE PRESENCE OF QUADRA-PURE® | 6  |
| OPTIMIZATION STUDIES                                                 | 1  |
| CHARACTERIZATION DATA FOR ALL PRODUCTS                               | 2  |
| 1,1,1-Trimethyl-N-(m-tolyl)silanamine (3a)                           | 2  |
| 1,1,1-Trimethyl-N-phenylsilanamine (3b)                              | 2  |
| 1,1,1-Trimethyl-N-(p-tolyl)silanamine (3c)                           | 2  |
| N-(3,4-dimethylphenyl)-1,1,1-trimethylsilanamine (3d)                | 3  |
| 1,1,1-Trimethyl-N-(4-vinylphenyl)silanamine (3e)                     | 3  |
| 1,1,1-Trimethyl-N-(2-(prop-1-en-2-yl)phenyl)silanamine (3f)          | 4  |
| 4-((Trimethylsilyl)amino)benzotrile (3g)                             | 4  |
| N-(4-bromophenyl)-1,1,1-trimethylsilanamine (3h)                     | 4  |
| N-(4-iodophenyl)-1,1,1-trimethylsilanamine (3i)                      | 5  |
| 1,1,1-Trimethyl-N-(4-((trifluoromethyl)thio)phenyl)silanamine (3j)   | 5  |
| 1,1,1-Trimethyl-N-(4-(trifluoromethoxy)phenyl)silanamine (3k)        | 6  |
| N-(4-(difluoromethoxy)phenyl)-1,1,1-trimethylsilanamine (3l)         | 6  |
| 1,1,1-Trimethyl-N-(4-(trifluoromethyl)phenyl)silanamine (3m)         | 6  |
| N-(4-methoxyphenyl)-1,1,1-trimethylsilanamine (3n)                   | 7  |
| 4-((Trimethylsilyl)oxy)aniline (3o)                                  | 7  |
| 1,1,1-Trimethyl-N-(3-((trimethylsilyl)ethynyl)phenyl)silanamine (3p) | 8  |
| 5-Methyl-N-(trimethylsilyl)pyridin-2-amine (5a)                      | 8  |
| 4,6-Dimethyl-N-(trimethylsilyl)pyridin-2-amine (5b)                  | 8  |
| N-(trimethylsilyl)pyrazin-2-amine (5c)                               | 9  |
| N-(trimethylsilyl)pyrimidin-2-amine (5d)                             | 9  |
| N-(trimethylsilyl)quinolin-8-amine (5e)                              | 9  |
| N-(trimethylsilyl)benzo[d]thiazol-6-amine (5f)                       | 10 |

|                                                                         |    |
|-------------------------------------------------------------------------|----|
| SPECTRA FOR ALL PRODUCTS                                                | 11 |
| 1,1,1-Trimethyl-N-(m-tolyl)silanamine (3a)                              | 11 |
| 1,1,1-Trimethyl-N-phenylsilanamine (3b)                                 | 13 |
| 1,1,1-Trimethyl-N-(p-tolyl)silanamine (3c)                              | 15 |
| N-(3,4-dimethylphenyl)-1,1,1-trimethylsilanamine (3d)                   | 17 |
| 1,1,1-Trimethyl-N-(4-vinylphenyl)silanamine (3e)                        | 19 |
| 1,1,1-Trimethyl-N-(2-(prop-1-en-2-yl)phenyl)silanamine (3f)             | 21 |
| 4-((Trimethylsilyl)amino)benzotrile (3g)                                | 23 |
| N-(4-bromophenyl)-1,1,1-trimethylsilanamine (3h)                        | 25 |
| N-(4-iodophenyl)-1,1,1-trimethylsilanamine (3i)                         | 27 |
| 1,1,1-Trimethyl-N-(4-((trifluoromethyl)thio)phenyl)silanamine (3j)      | 29 |
| 1,1,1-Trimethyl-N-(4-(trifluoromethoxy)phenyl)silanamine (3k)           | 31 |
| N-(4-(difluoromethoxy)phenyl)-1,1,1-trimethylsilanamine (3l)            | 33 |
| 1,1,1-Trimethyl-N-(4-(trifluoromethyl)phenyl)silanamine (3m)            | 35 |
| N-(4-methoxyphenyl)-1,1,1-trimethylsilanamine (3n)                      | 37 |
| 4-((Trimethylsilyl)oxy)aniline (3o)                                     | 39 |
| 1,1,1-Trimethyl-N-(3-((trimethylsilyl)ethynyl)phenyl)silanamine (3p)    | 41 |
| 5-Methyl-N-(trimethylsilyl)pyridin-2-amine (5a)                         | 43 |
| 4,6-Dimethyl-N-(trimethylsilyl)pyridin-2-amine (5b)                     | 45 |
| N-(trimethylsilyl)pyrazin-2-amine (5c)                                  | 47 |
| N-(trimethylsilyl)pyrimidin-2-amine (5d)                                | 49 |
| N-(trimethylsilyl)quinolin-8-amine (5e)                                 | 51 |
| N-(trimethylsilyl)benzo[d]thiazol-6-amine (5f)                          | 53 |
| CONFIRMATION FOR A DEPROTONATION OF 4-CF <sub>3</sub> -ANILINE BY KHMDS | 55 |

## GENERAL INFORMATION

Air- and moisture sensitive reactions were carried out under argon atmosphere using standard Schlenk techniques or a glove box. Bis(trimethylsilyl)acetylene was purchased from Sigma Aldrich (Merck, CAS: 14630-40-1, 99%) and used as received. Solvents used for all experiments were purchased from Honeyweel or Sigma Aldrich (Merck), dried over calcium hydride ( $\text{CaH}_2$ ) and purified by distillation. Toluene was additionally dried over sodium, and THF over sodium with benzophenone system. All reagents were commercially available and purchased from Sigma Aldrich (Merck), ABCR GmbH, Ambeed, or Apollo Scientific, dried over calcium hydride and purified by distillation. The progress of reactions (conversion of amines) was monitored by GC chromatography using Bruker Scion 460-GC and Agilent 5977B GC/MSD with Agilent 8860 GC System). The structures of products were determined by NMR spectroscopy and MS spectrometry. The  $^1\text{H}$  NMR (400 or 600 MHz),  $^{13}\text{C}$  NMR (101 or 151 MHz) and  $^{29}\text{Si}$  NMR (79 or 119 MHz) spectra were recorded on Bruker Avance III HD NanoBay spectrometer, using benzene- $\text{d}_6$  ( $\text{C}_6\text{D}_6$ ), chloroform- $\text{d}_1$  ( $\text{CDCl}_3$ ), or acetonitrile- $\text{d}_3$  ( $\text{CD}_3\text{CN}$ ) as the solvents. Deuterated solvents were purchased from Merck and Deutero GmbH and used as received.

## GENERAL SYNTHETIC PROCEDURES

### KHMDS-CATALYZED N-H SILYLATION OF SEVERAL PRIMARY AMINES

#### Compounds 3a-3n and 5a-5f

To a 25mL vial equipped with a magnetic stirring bar, potassium bis(trimethylsilyl)amide (0.030 mmol, 3.0 mol%) was added and stored under a high vacuum (10 min.). Subsequently, dry acetonitrile (1 mL), amine (**1a-1n** or **4a-4f**, 1 mmol), and bis(trimethylsilyl)acetylene (1 mmol, 0.17 g) were added under argon atmosphere. The reaction mixture was stirred at **rt** (except **4e/5e**, where reaction was performed at 80°C) for a specified time (1-24 h). After this time, solvent and volatile residues were evaporated under reduced pressure. Next, the crude products were separated *via* bulb-to-bulb distillation under a high vacuum (0.47 mbar), to give corresponding products **3a-3n** and **5a-5f**. The pure products were identified by <sup>1</sup>H, <sup>13</sup>C, and <sup>29</sup>Si NMR spectroscopies and MS spectrometry.

#### Compound 3o

To a 25mL vial equipped with a magnetic stirring bar, potassium bis(trimethylsilyl)amide (0.03 mmol, 3 mol%) was added and stored under a high vacuum (10 min.). Subsequently, dry acetonitrile (1 mL), 4-aminophenol (1 mmol), and bis(trimethylsilyl)acetylene (1 mmol, 0.17 g) were added under argon atmosphere. The reaction mixture was stirred at **rt** for a specified time (2 h). After this time, solvent and volatile residues were evaporated under reduced pressure. Next, the crude product was separated *via* bulb-to-bulb distillation under a high vacuum (0.47 mbar), to give corresponding product **3o**. The pure product was identified by <sup>1</sup>H, <sup>13</sup>C, and <sup>29</sup>Si NMR spectroscopies and MS spectrometry.

#### Compound 3p

To a 25mL vial equipped with a magnetic stirring bar, potassium bis(trimethylsilyl)amide (0.03 mmol, 3 mol%) was added and stored under a high vacuum (10 min.). Subsequently, dry acetonitrile (1 mL), 3-ethynylaniline (1 mmol), and bis(trimethylsilyl)acetylene (2 mmol, 0.34 g) were added under argon atmosphere. The reaction mixture was stirred at **rt** for a specified time (2 h). After this time, solvent and volatile residues were evaporated under reduced pressure. Next, the crude product was separated *via* bulb-to-bulb distillation under a high vacuum (0.47 mbar), to give corresponding product **3p**. The pure product was identified by <sup>1</sup>H, <sup>13</sup>C, and <sup>29</sup>Si NMR spectroscopies and MS spectrometry.

### KHMDS-CATALYZED SCALED UP N-H SILYLATION OF **3m**.

To a 50mL vial equipped with a magnetic stirring bar, potassium bis(trimethylsilyl)amide (0.3 mmol, 3 mol%, 0.0597 g) was added and stored under a high vacuum (10 min.). Subsequently, dry acetonitrile (10 mL), 4-trifluoromethylaniline (10 mmol, 1.61 g), and bis(trimethylsilyl)acetylene (10 mmol, 1.7 g) were added under argon atmosphere. The reaction mixture was stirred at **rt** for a specified time (3 h). After this time, solvent and volatile residues were evaporated under reduced pressure. Next, the crude product was separated *via* bulb-to-bulb distillation under a high vacuum (0.47 mbar), to give a pure product **3m** (2.16 g, 92% yield).

### **KHMDS-CATALYZED N–H SILYLATION OF 3m IN THE PRESENCE OF TEMPO**

To a 25mL vial equipped with a magnetic stirring bar, potassium bis(trimethylsilyl)amide (0.03 mmol, 3 mol%) was added and stored under a high vacuum (10 min.). Subsequently, dry acetonitrile (1 mL), 4-trifluoromethylaniline (1 mmol), and bis(trimethylsilyl)acetylene (2 mmol, 0.17 g) were added under argon atmosphere. The reaction mixture was stirred at rt for a specified time (3 h). After this time, solvent and volatile residues were evaporated under reduced pressure. Next, the crude product was separated *via* bulb-to-bulb distillation under a high vacuum (0.47 mbar), to give corresponding product **3m** (84%).

### **KHMDS-CATALYZED N–H SILYLATION OF 3m IN THE PRESENCE OF 18-CROWN-6**

To a 25mL vial equipped with a magnetic stirring bar, potassium bis(trimethylsilyl)amide (0.03 mmol, 3 mol%), and 18-crown-6 (1 mmol) were added and stored under a high vacuum (10 min.). Subsequently, dry acetonitrile (1 mL), 4-trifluoromethylaniline (1 mmol), and bis(trimethylsilyl)acetylene (2 mmol, 0.17 g) were added under argon atmosphere. The reaction mixture was stirred at rt for a specified time (3 h). After this time, solvent and volatile residues were evaporated under reduced pressure. Next, the crude product was separated *via* bulb-to-bulb distillation under a high vacuum (0.47 mbar), to give corresponding product **3m** (82%).

### **KHMDS-CATALYZED N–H SILYLATION OF 3m IN THE PRESENCE OF QUADRA-PURE®**

To a 25mL vial equipped with a magnetic stirring bar, potassium bis(trimethylsilyl)amide (0.03 mmol, 3 mol%) and 100 mg of Quadra-Pure® TU were added and stored under a high vacuum (10 min.). Subsequently, dry acetonitrile (1 mL), 4-trifluoromethylaniline (1 mmol), and bis(trimethylsilyl)acetylene (2 mmol, 0.17 g) were added under argon atmosphere. The reaction mixture was stirred at rt for a specified time (3 h). After this time, solvent and volatile residues were evaporated under reduced pressure. Next, the crude product was separated *via* bulb-to-bulb distillation under a high vacuum (0.47 mbar), to give corresponding product **3m** (85%).

## OPTIMIZATION STUDIES

**TABLE S1. OPTIMIZATION N–H silylation.<sup>a</sup>**

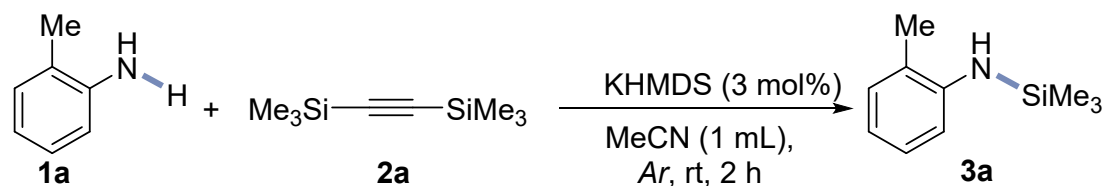

| Entry | Variation from standard conditions              | Conversion of <b>1a</b> [%] <sup>b</sup> |
|-------|-------------------------------------------------|------------------------------------------|
| 1     | no change                                       | 99 (97) <sup>c</sup>                     |
| 2     | no catalyst                                     | 0 <sup>d</sup>                           |
| 3     | under air atmosphere                            | 97                                       |
| 4     | trimethylsilylacetylene instead of BTMSA        | 95 <sup>E,F</sup>                        |
| 5     | Trimethyl(phenylethynyl)silane instead of BTMSA | 16 <sup>E</sup>                          |
| 6     | 0.5 eq. of BTMSA                                | 85                                       |
| 7     | 1.5 mol% of KHMDS                               | 95                                       |
| 8     | 3 mol% of KOH                                   | 85                                       |
| 9     | 5 mol% of KOH (rt/50°C)                         | 90/95 (92) <sup>c</sup>                  |
| 10    | 3 mol% of t-BuOK                                | 94                                       |
| 11    | 3 mol% of KF                                    | 0                                        |
| 12    | in tetrahydrofuran                              | 75                                       |
| 13    | in toluene                                      | 0                                        |
| 14    | in dioxane                                      | 0                                        |

<sup>a</sup>Reaction conditions: **1a** (1 mmol), **2a** (1 mmol), under argon atmosphere. <sup>b</sup>Conversion determined *via* GC, with n-dodecane as internal standard. <sup>c</sup>Isolated yield in parenthesis. <sup>d</sup>In a brand-new set of equipment, to exclude the influence of any transition metal impurities. <sup>e</sup>After 2 h and 10 h, with 2 eq. of trimethylsilylacetylene. <sup>f</sup>2 eq. of trimethylsilylacetylene.

## CHARACTERIZATION DATA FOR ALL PRODUCTS

### 1,1,1-Trimethyl-N-(m-tolyl)silanamine (3a)

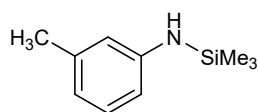

1,1,1-Trimethyl-N-(m-tolyl)silanamine was obtained as pale-yellow oil in 97% yield.

**<sup>1</sup>H NMR** (400 MHz, C<sub>6</sub>D<sub>6</sub>) δ (ppm) = 7.08 (t, *J* = 7.7 Hz, 1H), 6.63 – 6.57 (m, 1H), 6.50 – 6.43 (m, 1H), 6.42 – 6.36 (m, 11H), 3.04 (s, 1H), 2.18 (s, 3H), 0.14 (s, 9H).

**<sup>13</sup>C NMR** (101 MHz, C<sub>6</sub>D<sub>6</sub>) δ (ppm) = 147.7, 138.9, 119.0, 117.6, 113.7, 21.7, 0.1.

**<sup>29</sup>Si NMR** (79 MHz, C<sub>6</sub>D<sub>6</sub>) δ (ppm) = 2.2.

**EI-MS m/z (rel. int.):** 179 (50%, [M]<sup>+</sup>), 164 (100), 106 (30).

### 1,1,1-Trimethyl-N-phenylsilanamine (3b)

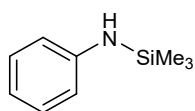

1,1,1-Trimethyl-N-phenylsilanamine was obtained as pale-yellow oil in 92% yield.

**<sup>1</sup>H NMR** (400 MHz, C<sub>6</sub>D<sub>6</sub>) δ (ppm) = 7.19 – 7.12 (m, 2H), 6.82 – 6.73 (m, 1H), 6.62 – 6.55 (m, 2H), 0.12 (s, 9H).

**<sup>13</sup>C NMR** (101 MHz, C<sub>6</sub>D<sub>6</sub>) δ (ppm) = 147.7, 129.6, 118.1, 116.6, -0.0.

**<sup>29</sup>Si NMR** (79 MHz, C<sub>6</sub>D<sub>6</sub>) δ (ppm) = 2.3.

**EI-MS m/z (rel. int.):** 165 (35%, [M]<sup>+</sup>), 150 (100), 134 (5).

### 1,1,1-Trimethyl-N-(p-tolyl)silanamine (3c)

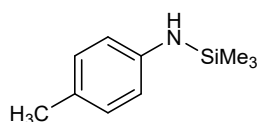

1,1,1-Trimethyl-N-(p-tolyl)silanamine was obtained as pale-yellow oil in 95% yield.

**<sup>1</sup>H NMR** (400 MHz, C<sub>6</sub>D<sub>6</sub>) δ (ppm) = 7.08 – 6.90 (m, 2H), 6.54 (d, *J* = 8.4 Hz, 2H), 2.98 (s, 1H), 2.19 (s, 3H), 0.13 (s, 9H).

**<sup>13</sup>C NMR** (101 MHz, C<sub>6</sub>D<sub>6</sub>) δ (ppm) = 145.2, 130.1, 126.7, 116.7, 20.6, 0.1.



**<sup>29</sup>Si NMR** (79 MHz, C<sub>6</sub>D<sub>6</sub>) δ (ppm) = 2.0.

**EI-MS m/z (rel. int.):** 179 (45%, [M]<sup>+</sup>), 164 (100), 106 (30).

### **N-(3,4-dimethylphenyl)-1,1,1-trimethylsilanamine (3d)**

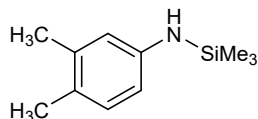

N-(3,4-dimethylphenyl)-1,1,1-trimethylsilanamine was obtained as pale-yellow oil in 97% yield.

**<sup>1</sup>H NMR** (600 MHz, C<sub>6</sub>D<sub>6</sub>) δ (ppm) = 6.94 (d, *J* = 8.0 Hz, 1H), 6.46 (dd, *J* = 8.0, 2.6 Hz, 1H), 6.42 (d, *J* = 2.6 Hz, 1H), 2.96 (s, 1H), 2.08 (s, 3H), 2.08 (s, 3H), 0.16 (s, 9H).

**<sup>13</sup>C NMR** (151 MHz, C<sub>6</sub>D<sub>6</sub>) δ (ppm) = 145.6, 137.1, 130.7, 125.5, 118.6, 114.1, 20.1, 18.9, 0.2.

**<sup>29</sup>Si NMR** (79 MHz, C<sub>6</sub>D<sub>6</sub>) δ (ppm) = 1.4.

**EI-MS m/z (rel. int.):** 193 (55%, [M]<sup>+</sup>), 178 (100), 163 (20).

### **1,1,1-Trimethyl-N-(4-vinylphenyl)silanamine (3e)**

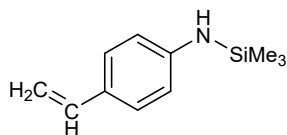

1,1,1-Trimethyl-N-(4-vinylphenyl)silanamine was obtained as pale-yellow oil in 90% yield.

**<sup>1</sup>H NMR** (400 MHz, C<sub>6</sub>D<sub>6</sub>) δ (ppm) = 7.20 (d, *J* = 8.5 Hz, 2H), 6.66 (dd, *J* = 17.5, 10.9 Hz, 1H), 6.48 (d, *J* = 8.6 Hz, 2H), 5.58 (dd, *J* = 17.6, 1.2 Hz, 1H), 5.04 (dd, *J* = 10.8, 1.2 Hz, 1H), 3.08 (s, 1H), 0.10 (s, 9H).

**<sup>13</sup>C NMR** (101 MHz, C<sub>6</sub>D<sub>6</sub>) δ (ppm) = 147.9, 137.6, 128.3, 128.0, 116.8, 109.8, 0.2.

**<sup>29</sup>Si NMR** (79 MHz, C<sub>6</sub>D<sub>6</sub>) δ (ppm) = 2.7.

**EI-MS m/z (rel. int.):** 191 (75%, [M]<sup>+</sup>), 176 (100), 119 (20).

### **1,1,1-Trimethyl-N-(2-(prop-1-en-2-yl)phenyl)silanamine (3f)**

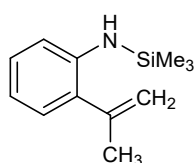

1,1,1-Trimethyl-N-(2-(prop-1-en-2-yl)phenyl)silanamine was obtained as pale-yellow oil in 89% yield.

**<sup>1</sup>H NMR** (600 MHz, C<sub>6</sub>D<sub>6</sub>) δ (ppm) = 7.11 – 7.03 (m, 2H), 6.91 – 6.85 (m, 1H), 6.79 – 6.71 (m, 1H), 5.16 (d, *J* = 1.4 Hz, 1H), 5.04 (d, *J* = 1.1 Hz, 1H), 4.07 (s, 3H), 1.90 (s, 9H).

**<sup>13</sup>C NMR** (151 MHz, C<sub>6</sub>D<sub>6</sub>) δ (ppm) = 144.3, 143.6, 131.3, 128.3, 128.0, 127.9, 117.6, 115.3, 23.8, -0.3.

**<sup>29</sup>Si NMR** (119 MHz, C<sub>6</sub>D<sub>6</sub>) δ (ppm) = 2.0.

**EI-MS m/z (rel. int.):** 205 (60%, [M]<sup>+</sup>), 190 (30), 132 (100).

#### 4-((Trimethylsilyl)amino)benzonitrile (3g)

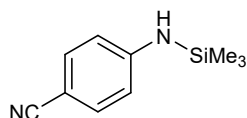

4-((Trimethylsilyl)amino)benzonitrile was obtained as pale-yellow oil in 89% yield.

**<sup>1</sup>H NMR** (600 MHz, C<sub>6</sub>D<sub>6</sub>) δ (ppm) = 7.06 (d, *J* = 8.6 Hz, 2H), 6.32 – 6.16 (m, 2H), 3.57 (s, 1H), 0.02 (s, 9H).

**<sup>13</sup>C NMR** (151 MHz, C<sub>6</sub>D<sub>6</sub>) δ (ppm) = 151.7, 133.3, 120.0, 116.1, 99.9, -0.8.

**<sup>29</sup>Si NMR** (119 MHz, C<sub>6</sub>D<sub>6</sub>) δ (ppm) = 4.1.

**EI-MS m/z (rel. int.):** 190 (25%, [M]<sup>+</sup>), 175 (100), 159 (10).

#### N-(4-bromophenyl)-1,1,1-trimethylsilanamine (3h)

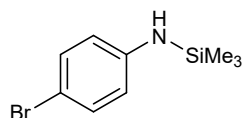

N-(4-bromophenyl)-1,1,1-trimethylsilanamine was obtained as pale-yellow oil in 99% yield.

**<sup>1</sup>H NMR** (400 MHz, C<sub>6</sub>D<sub>6</sub>) δ (ppm) = 7.15 (d, *J* = 9.0 Hz, 2H), 6.21 (dd, *J* = 8.9, 1.0 Hz, 2H), 2.95 (s, 1H), 0.04 (s, 9H).

**<sup>13</sup>C NMR** (101 MHz, C<sub>6</sub>D<sub>6</sub>) δ (ppm) = 147.0, 132.5, 118.4, 110.0, 109.9, 0.0.

**<sup>29</sup>Si NMR** (79 MHz, C<sub>6</sub>D<sub>6</sub>) δ (ppm) = 3.1.

**EI-MS m/z (rel. int.):** 243 (85%, [M]<sup>+</sup>), 230 (90), 149 (100).

### N-(4-iodophenyl)-1,1,1-trimethylsilanamine (3i)

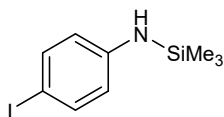

N-(4-iodophenyl)-1,1,1-trimethylsilanamine was obtained as pale-yellow oil in 95% yield.

**<sup>1</sup>H NMR** (600 MHz, C<sub>6</sub>D<sub>6</sub>) δ (ppm) = 7.32 (d, *J* = 8.7 Hz, 2H), 6.13 (d, *J* = 8.8 Hz, 2H), 2.95 (s, 1H), 0.04 (s, 9H).

**<sup>13</sup>C NMR** (151 MHz, C<sub>6</sub>D<sub>6</sub>) δ (ppm) = 147.0, 137.9, 118.5, 78.5, -0.5.

**<sup>29</sup>Si NMR** (119 MHz, C<sub>6</sub>D<sub>6</sub>) δ (ppm) = 2.7.

**EI-MS m/z (rel. int.):** 291 (100%, [M]<sup>+</sup>), 276 (60), 149 (30).

### 1,1,1-Trimethyl-N-(4-((trifluoromethyl)thio)phenyl)silanamine (3j)

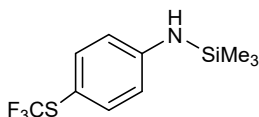

1,1,1-Trimethyl-N-(4-((trifluoromethyl)thio)phenyl)silanamine was obtained as pale-yellow oil in 88% yield.

**<sup>1</sup>H NMR** (600 MHz, C<sub>6</sub>D<sub>6</sub>) δ (ppm) = 7.33 (d, *J* = 8.6 Hz, 2H), 6.36 – 6.16 (m, 2H), 3.10 (s, 1H), 0.01 (s, 9H).

**<sup>13</sup>C NMR** (151 MHz, C<sub>6</sub>D<sub>6</sub>) δ (ppm) = 150.7, 138.5, 130.75 (q, *J* = 308.1 Hz), 117.2, 110.6, -0.4.

**<sup>19</sup>F NMR** (565 MHz, C<sub>6</sub>D<sub>6</sub>) δ (ppm) = -44.3.

**<sup>29</sup>Si NMR** (119 MHz, C<sub>6</sub>D<sub>6</sub>) δ (ppm) = 3.5.

**EI-MS m/z (rel. int.):** 265 (100%, [M]<sup>+</sup>), 250 (50), 196 (45).

### 1,1,1-Trimethyl-N-(4-(trifluoromethoxy)phenyl)silanamine (3k)

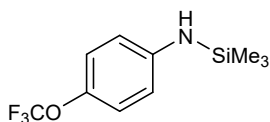

1,1,1-Trimethyl-N-(4-(trifluoromethoxy)phenyl)silanamine was obtained as pale-yellow oil in 88% yield.

**<sup>1</sup>H NMR** (600 MHz, C<sub>6</sub>D<sub>6</sub>) δ (ppm) = 6.88 (d, *J* = 8.2 Hz, 2H), 6.35 – 6.19 (m, 1H), 2.98 (s, 1H), 0.05 (s, 9H).

**<sup>13</sup>C NMR** (151 MHz, C<sub>6</sub>D<sub>6</sub>) δ (ppm) = 146.8, 122.6, 121.9 (q, *J* = 182 Hz), 116.8, 115.3, -0.3.

**<sup>19</sup>F NMR** (565 MHz, C<sub>6</sub>D<sub>6</sub>) δ (ppm) = -58.2.

**<sup>29</sup>Si NMR** (119 MHz, C<sub>6</sub>D<sub>6</sub>) δ (ppm) = 2.8.

**EI-MS m/z (rel. int.):** 249 (40%, [M]<sup>+</sup>), 234 (100), 218 (5).

### **N-(4-(difluoromethoxy)phenyl)-1,1,1-trimethylsilanamine (3l)**

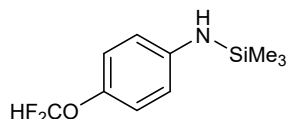

N-(4-(difluoromethoxy)phenyl)-1,1,1-trimethylsilanamine was obtained as pale-yellow oil in 88% yield.

**<sup>1</sup>H NMR** (600 MHz, C<sub>6</sub>D<sub>6</sub>) δ (ppm) = 6.81 (d, *J* = 8.9 Hz, 2H), 6.39 – 6.25 (m, 2H), 6.12 – 5.75 (m, 1H), 2.96 (s, 1H), 0.08 (s, 9H).

**<sup>13</sup>C NMR** (151 MHz, C<sub>6</sub>D<sub>6</sub>) δ (ppm) = 144.39 (dd, *J* = 351.2, 3.1 Hz), 121.6, 117.3 (q, *J* = 176 Hz), 117.0, -0.2.

**<sup>19</sup>F NMR** (565 MHz, C<sub>6</sub>D<sub>6</sub>) δ (ppm) = -79.52 (d, *J* = 75.1 Hz).

**<sup>29</sup>Si NMR** (119 MHz, C<sub>6</sub>D<sub>6</sub>) δ (ppm) = 2.4.

**EI-MS m/z (rel. int.):** 231 (45%, [M]<sup>+</sup>), 216 (100), 159 (15).

### **1,1,1-Trimethyl-N-(4-(trifluoromethyl)phenyl)silanamine (3m)**

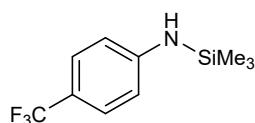

1,1,1-Trimethyl-N-(4-(trifluoromethyl)phenyl)silanamine was obtained as pale-yellow oil in 85% yield.

**<sup>1</sup>H NMR** (600 MHz, C<sub>6</sub>D<sub>6</sub>) δ (ppm) = 7.29 (d, *J* = 8.5 Hz, 2H), 6.28 (d, *J* = 8.2 Hz, 2H), 3.10 (s, 1H), 0.03 (s, 9H).

**<sup>13</sup>C NMR** (151 MHz, C<sub>6</sub>D<sub>6</sub>) δ (ppm) = 151.1, 127.1, 126.1 (q, *J* = 186 Hz), 119.9 (q, *J* = 180 Hz), 116.2, -0.2.

**<sup>19</sup>F NMR** (565 MHz, C<sub>6</sub>D<sub>6</sub>) δ (ppm) = -60.6.

**<sup>29</sup>Si NMR** (119 MHz, C<sub>6</sub>D<sub>6</sub>) δ (ppm) = 3.4.

**EI-MS m/z (rel. int.):** 233 (35%, [M]<sup>+</sup>), 218 (100), 149 (5).

### N-(4-methoxyphenyl)-1,1,1-trimethylsilanamine (3n)

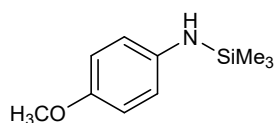

N-(4-methoxyphenyl)-1,1,1-trimethylsilanamine was obtained as pale-yellow oil in 95% yield.

**<sup>1</sup>H NMR** (600 MHz, C<sub>6</sub>D<sub>6</sub>) δ (ppm) = 6.80 – 6.71 (m, 2H), 6.52 (d, *J* = 8.8 Hz, 2H), 3.41 (s, 3H), 2.86 (s, 1H), 0.14 (s, 9H).

**<sup>13</sup>C NMR** (151 MHz, C<sub>6</sub>D<sub>6</sub>) δ (ppm) = 153.0, 141.2, 117.6, 115.3, 55.3, 0.1.

**<sup>29</sup>Si NMR** (119 MHz, C<sub>6</sub>D<sub>6</sub>) δ (ppm) = 1.4.

**EI-MS m/z (rel. int.):** 195 (80%, [M]<sup>+</sup>), 180 (100), 108 (40).

### 4-((Trimethylsilyl)oxy)aniline (3o)

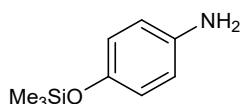

4-((Trimethylsilyl)oxy)aniline was obtained as pale-yellow oil in 95% yield.

**<sup>1</sup>H NMR** (400 MHz, C<sub>6</sub>D<sub>6</sub>) δ (ppm) = 6.99 – 6.51 (m, 2H), 6.39 – 6.14 (m, 2H), 2.80 (s, 2H), 0.19 (s, 9H).

**<sup>13</sup>C NMR** (101 MHz, C<sub>6</sub>D<sub>6</sub>) δ (ppm) = 147.8, 141.6, 120.9, 116.3, 0.2.

**<sup>29</sup>Si NMR** (79 MHz, C<sub>6</sub>D<sub>6</sub>) δ (ppm) = 18.0.

**EI-MS m/z (rel. int.):** 181 (90%, [M]<sup>+</sup>), 166 (100), 149 (10).

### 1,1,1-Trimethyl-N-(3-((trimethylsilyl)ethynyl)phenyl)silanamine (3p)

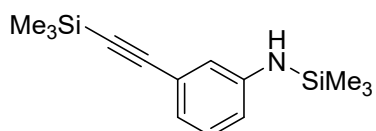

1,1,1-Trimethyl-N-(3-((trimethylsilyl)ethynyl)phenyl)silanamine was obtained as pale-yellow oil in 88% yield.

**<sup>1</sup>H NMR** (400 MHz, C<sub>6</sub>D<sub>6</sub>) δ (ppm) = 7.06 (t, *J* = 7.9 Hz, 1H), 6.84 (d, *J* = 7.6 Hz, 1H), 6.75 (s, 1H), 6.67 – 6.58 (m, 1H), 3.42 (s, 1H), 0.28 (s, 9H), 0.26 (s, 9H).

**<sup>13</sup>C NMR** (101 MHz, C<sub>6</sub>D<sub>6</sub>) δ (ppm) = 147.4, 129.2, 123.9, 121.6, 119.4, 116.8, 105.9, 93.2, 0.2.

**<sup>29</sup>Si NMR** (79 MHz, C<sub>6</sub>D<sub>6</sub>) δ (ppm) = 3.5, -18.0.

**EI-MS m/z (rel. int.):** 261 (55%, [M]<sup>+</sup>), 246 (100), 174 (50).

#### 5-Methyl-N-(trimethylsilyl)pyridin-2-amine (5a)

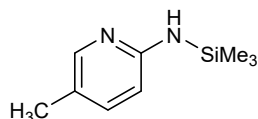

5-Methyl-N-(trimethylsilyl)pyridin-2-amine was obtained as pale-yellow oil in 98% yield.

**<sup>1</sup>H NMR** (600 MHz, C<sub>6</sub>D<sub>6</sub>) δ (ppm) = 7.98 (d, *J* = 2.5 Hz, 1H), 6.89 (dd, *J* = 8.3, 2.5 Hz, 1H), 6.03 (d, *J* = 8.1 Hz, 1H), 3.74 (s, 1H), 1.88 (s, 3H), 0.31 (s, 9H).

**<sup>13</sup>C NMR** (151 MHz, C<sub>6</sub>D<sub>6</sub>) δ (ppm) = 158.2, 148.2, 137.9, 121.4, 109.5, 17.2, 0.1.

**<sup>29</sup>Si NMR** (119 MHz, C<sub>6</sub>D<sub>6</sub>) δ (ppm) = 1.9.

**EI-MS m/z (rel. int.):** 180 (20%, [M]<sup>+</sup>), 165 (100), 135 (5).

#### 4,6-Dimethyl-N-(trimethylsilyl)pyridin-2-amine (5b)

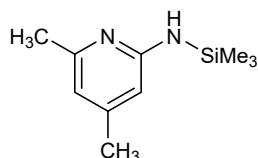

4,6-Dimethyl-N-(trimethylsilyl)pyridin-2-amine was obtained as pale-yellow oil in 97% yield.

**<sup>1</sup>H NMR** (600 MHz, C<sub>6</sub>D<sub>6</sub>) δ (ppm) = 6.12 (s, 1H), 5.74 (s, 1H), 3.72 (s, 1H), 2.30 (s, 3H), 1.91 (s, 3H), 0.33 (s, 9H).

**<sup>13</sup>C NMR** (151 MHz, C<sub>6</sub>D<sub>6</sub>) δ (ppm) = 160.0, 156.6, 148.1, 113.8, 107.3, 24.2, 20.8, 0.4.

**<sup>29</sup>Si NMR** (119 MHz, C<sub>6</sub>D<sub>6</sub>) δ (ppm) = 1.7.

**EI-MS m/z (rel. int.):** 194 (15%, [M]<sup>+</sup>), 179 (100), 149 (5).

#### N-(trimethylsilyl)pyrazin-2-amine (5c)

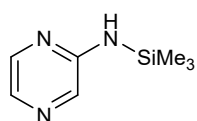

N-(trimethylsilyl)pyrazin-2-amine was obtained as pale-yellow oil in 91% yield.

**<sup>1</sup>H NMR** (600 MHz, C<sub>6</sub>D<sub>6</sub>) δ (ppm) = 7.84 – 7.59 (m, 3H), 4.00 (s, 1H), 0.24 (s, 9H).

**<sup>13</sup>C NMR** (151 MHz, C<sub>6</sub>D<sub>6</sub>) δ (ppm) = 157.1, 142.2, 134.9, 134.0, -0.1.

**<sup>29</sup>Si NMR** (119 MHz, C<sub>6</sub>D<sub>6</sub>) δ (ppm) = 4.5.

**EI-MS m/z (rel. int.):** 167 (35%, [M]<sup>+</sup>), 152 (100), 125 (15).

#### **N-(trimethylsilyl)pyrimidin-2-amine (5d)**

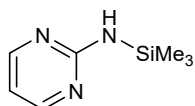

N-(trimethylsilyl)pyrimidin-2-amine was obtained as pale-yellow oil in 91% yield.

**<sup>1</sup>H NMR** (400 MHz, C<sub>6</sub>D<sub>6</sub>) δ (ppm) = 8.02 (d, *J* = 4.8 Hz, 2H), 6.00 (t, *J* = 4.8 Hz, 1H), 5.81 (s, 1H), 0.27 (s, 9H).

**<sup>13</sup>C NMR** (101 MHz, C<sub>6</sub>D<sub>6</sub>) δ (ppm) = 165.4, 158.0, 111.1, -0.3.

**<sup>29</sup>Si NMR** (79 MHz, C<sub>6</sub>D<sub>6</sub>) δ (ppm) = 3.9.

**EI-MS m/z (rel. int.):** 167 (35%, [M]<sup>+</sup>), 152 (100), 125 (15).

#### **N-(trimethylsilyl)quinolin-8-amine (5e)**

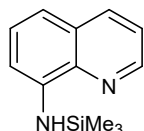

N-(trimethylsilyl)quinolin-8-amine was obtained as pale-yellow oil in 99% yield.

**<sup>1</sup>H NMR** (600 MHz, C<sub>6</sub>D<sub>6</sub>) δ (ppm) = 8.65 (d, *J* = 1.7 Hz, 1H), 7.71 – 7.63 (m, 1H), 7.40 – 7.30 (m, 1H), 7.11 – 7.01 (m, 2H), 6.92 – 6.84 (m, 1H), 6.68 (s, 1H), 0.31 (s, 9H).

**<sup>13</sup>C NMR** (151 MHz, C<sub>6</sub>D<sub>6</sub>) δ (ppm) = 146.8, 145.7, 139.9, 135.8, 129.2, 128.1, 121.2, 115.0, 109.4, -0.5.

**<sup>29</sup>Si NMR** (119 MHz, C<sub>6</sub>D<sub>6</sub>) δ (ppm) = 2.7.

**EI-MS m/z (rel. int.):** 216 (15%, [M]<sup>+</sup>), 201 (100), 171 (40).

**N-(trimethylsilyl)benzo[d]thiazol-6-amine (5f)**

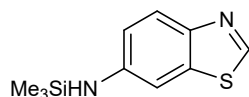

N-(trimethylsilyl)benzo[d]thiazol-6-amine was obtained as pale-yellow oil in 98% yield.

**<sup>1</sup>H NMR** (400 MHz, C<sub>6</sub>D<sub>6</sub>) δ (ppm) = 8.19 (s, 1H), 8.01 (d, *J* = 8.7 Hz, 1H), 6.90 (d, *J* = 2.4 Hz, 1H), 6.57 (dd, *J* = 8.7, 2.4 Hz, 1H), 3.18 (s, 1H), 0.07 (s, 9H).

**<sup>13</sup>C NMR** (101 MHz, C<sub>6</sub>D<sub>6</sub>) δ (ppm) = 149.0, 147.3, 146.2, 136.4, 124.5, 117.4, 106.8, -0.1.

**<sup>29</sup>Si NMR** (79 MHz, C<sub>6</sub>D<sub>6</sub>) δ (ppm) = 3.2.

**EI-MS *m/z* (rel. int.):** 222 (50%, [M]<sup>+</sup>), 207 (100), 150 (30).



# SPECTRA FOR ALL PRODUCTS

## 1,1,1-Trimethyl-N-(m-tolyl)silanamine (3a)

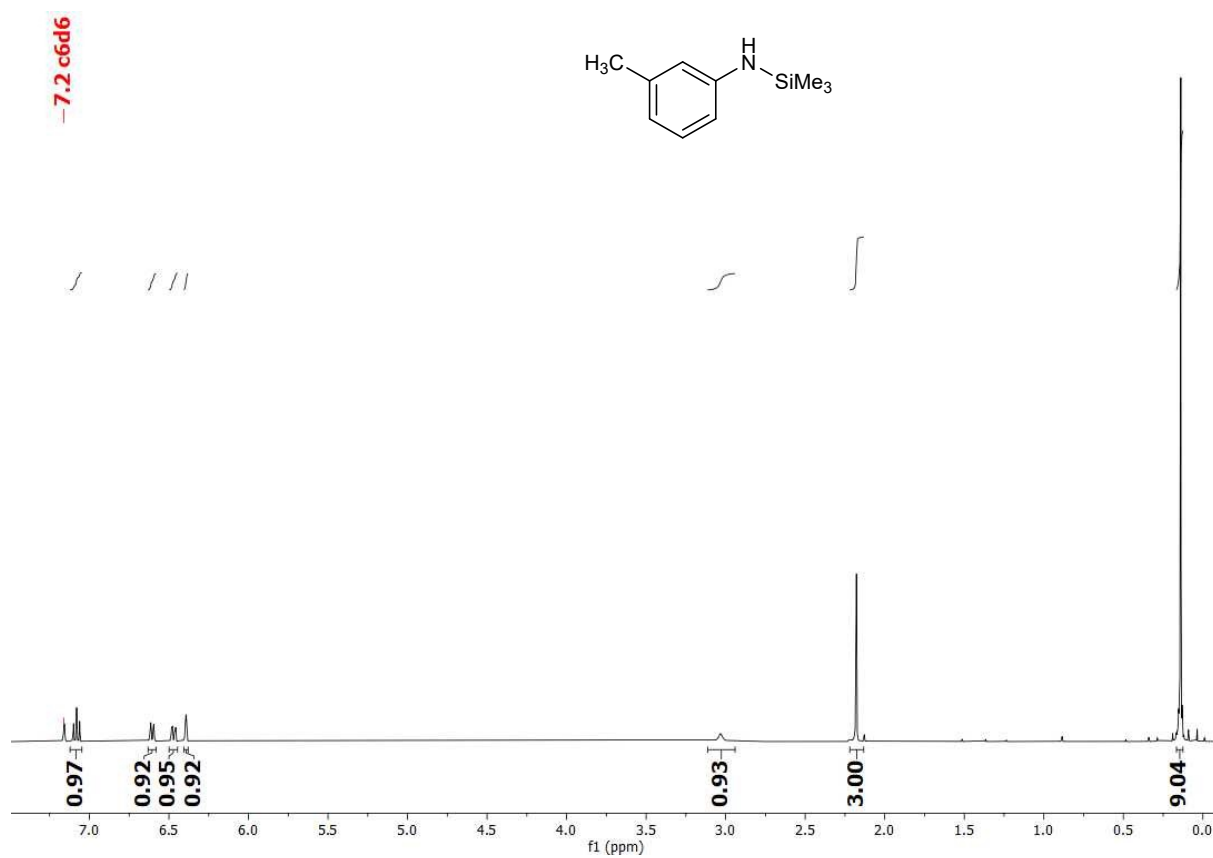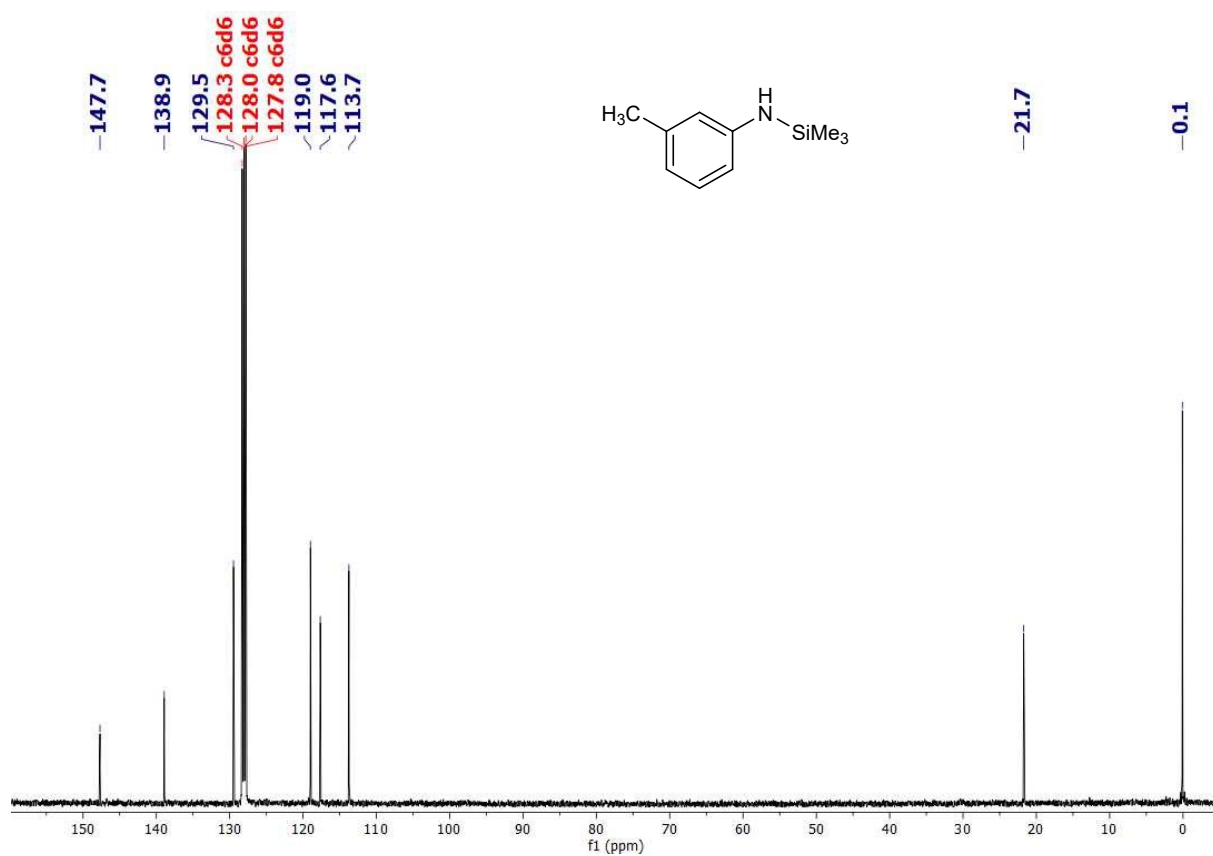

-2.2

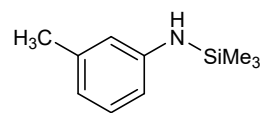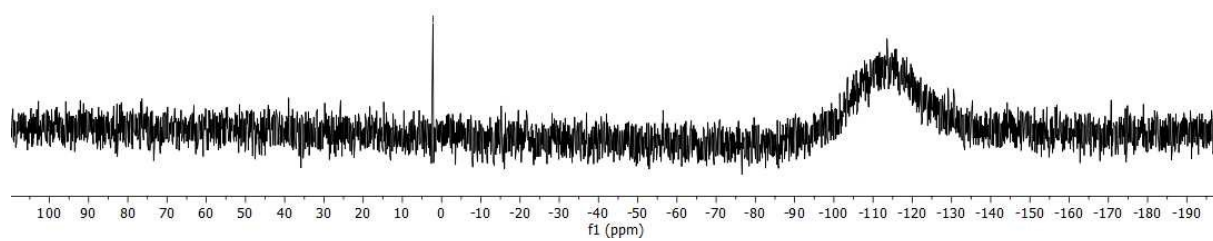

# 1,1,1-Trimethyl-N-phenylsilanamine (3b)

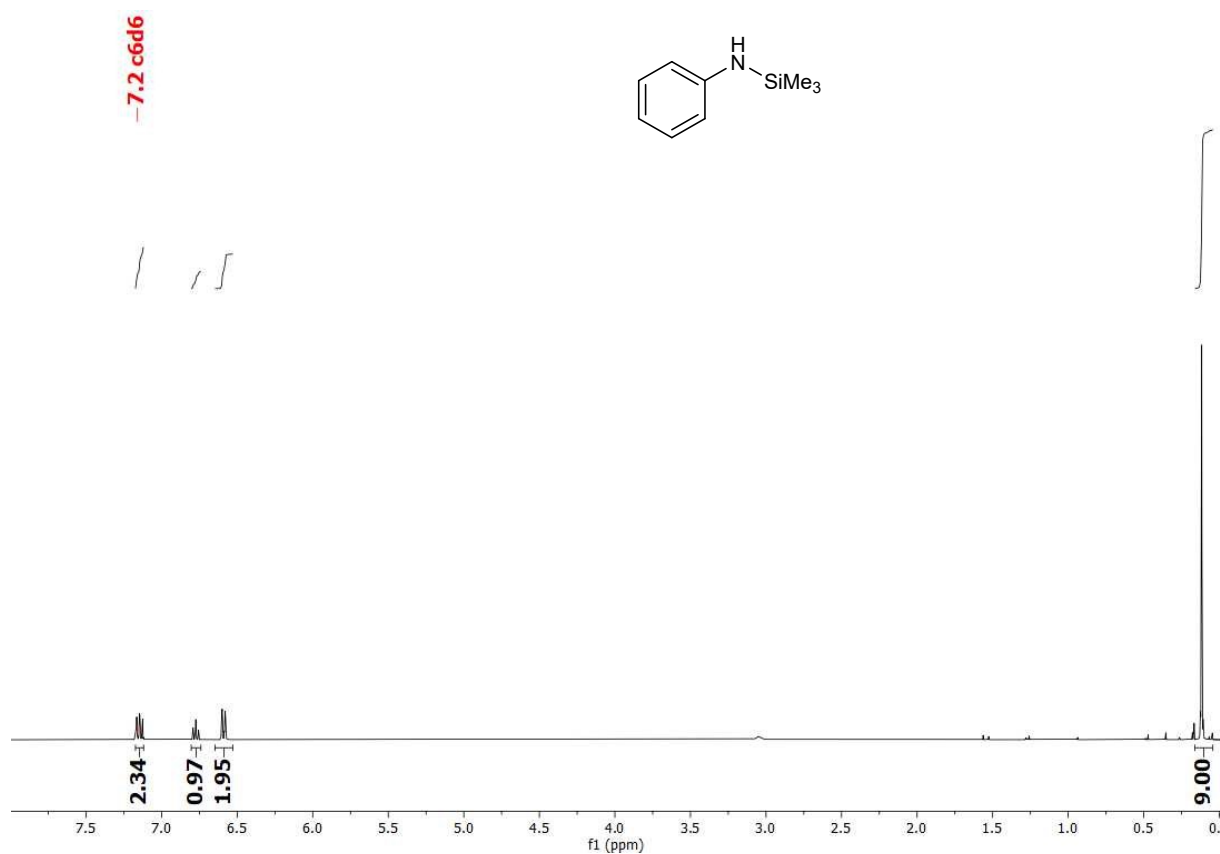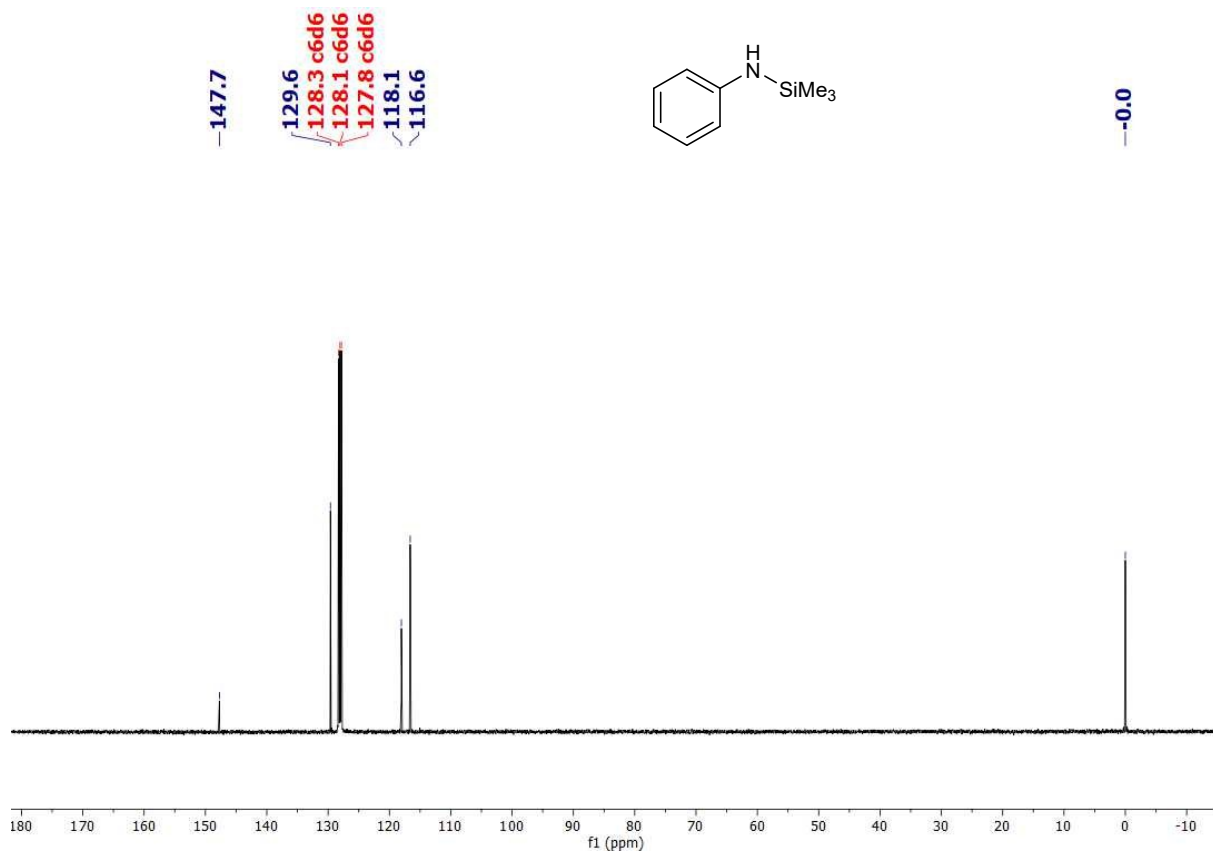

-2.3

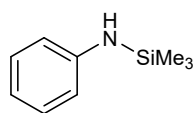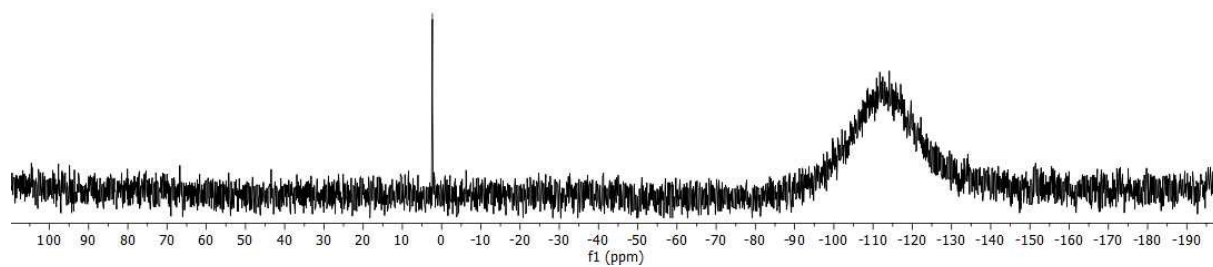

# 1,1,1-Trimethyl-N-(p-tolyl)silanamine (3c)

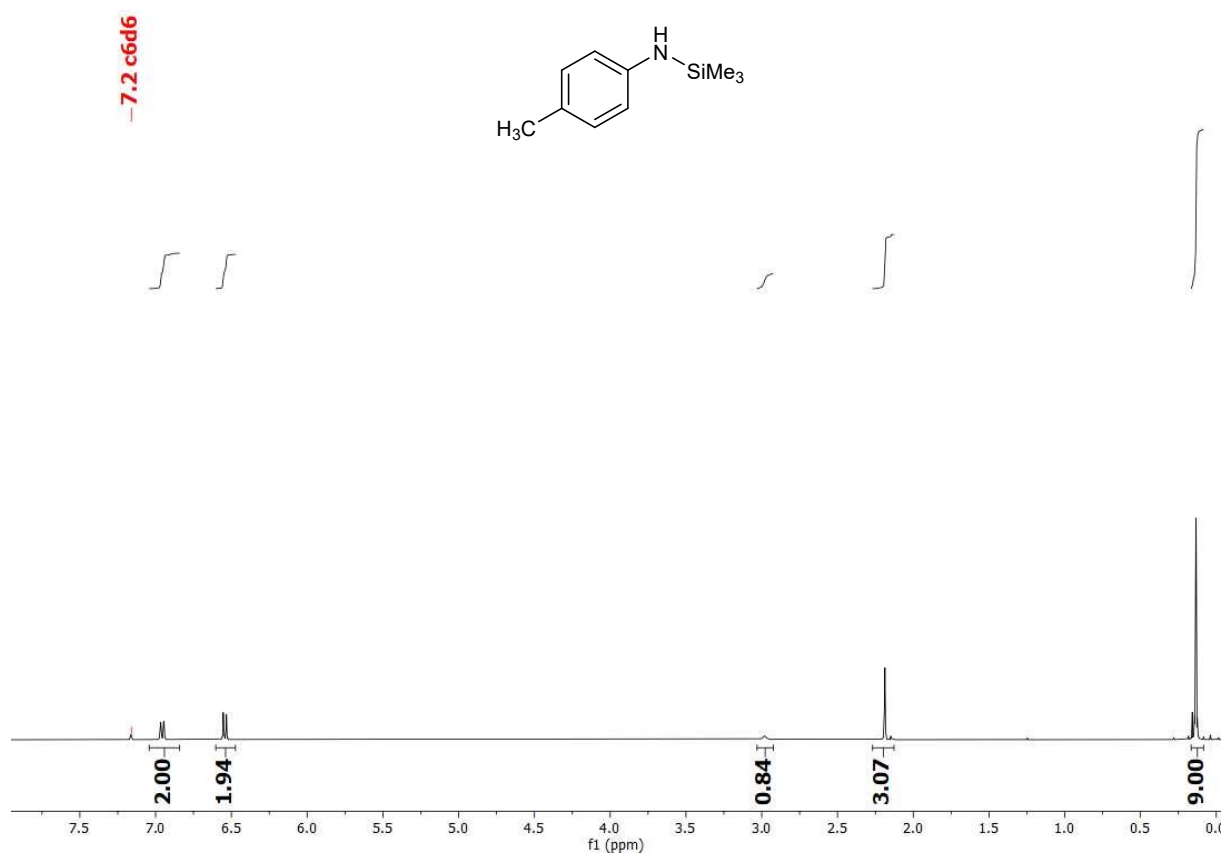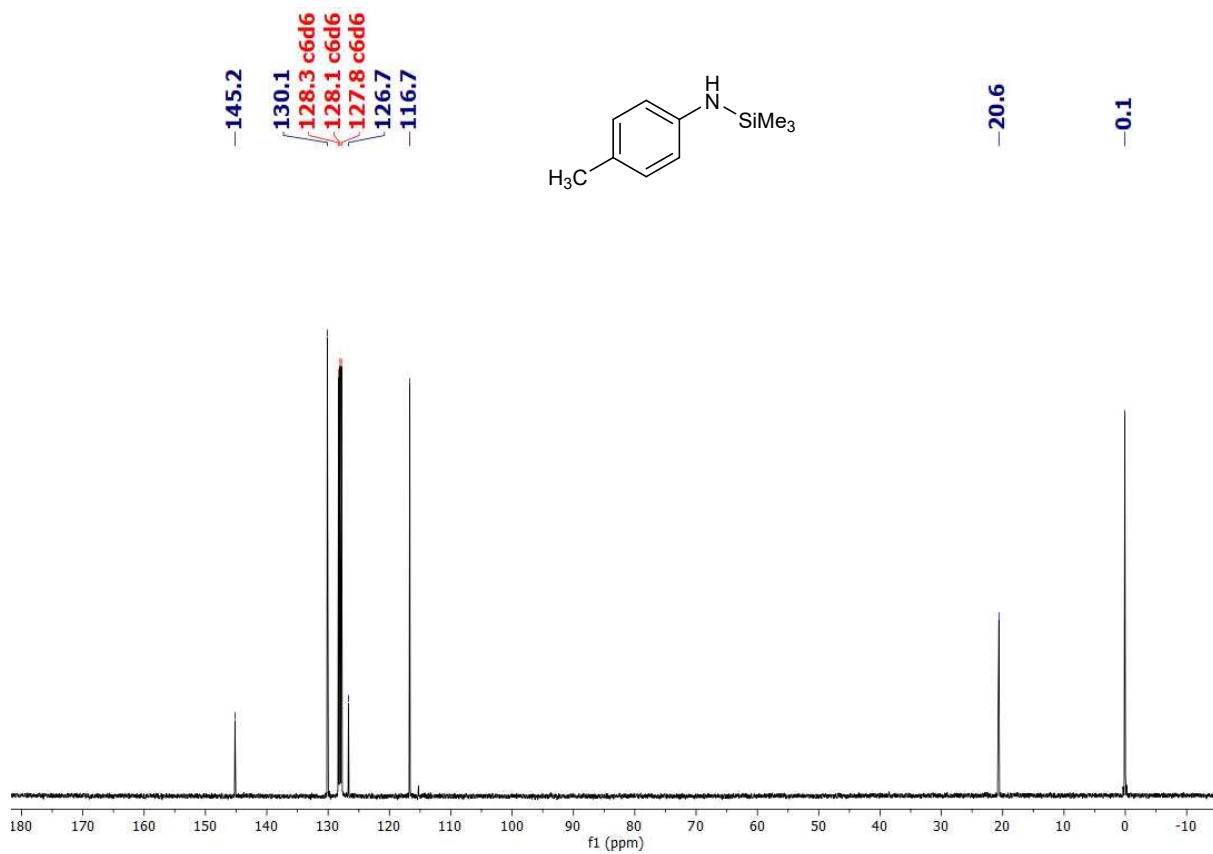

-2.0

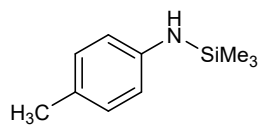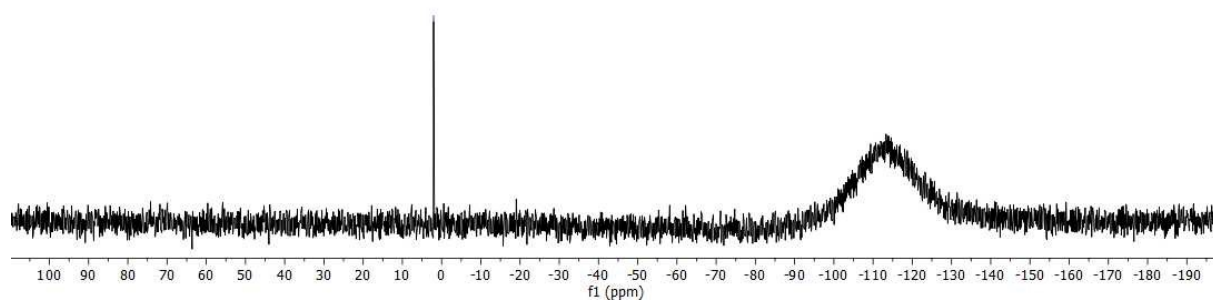

# N-(3,4-dimethylphenyl)-1,1,1-trimethylsilanamine (3d)

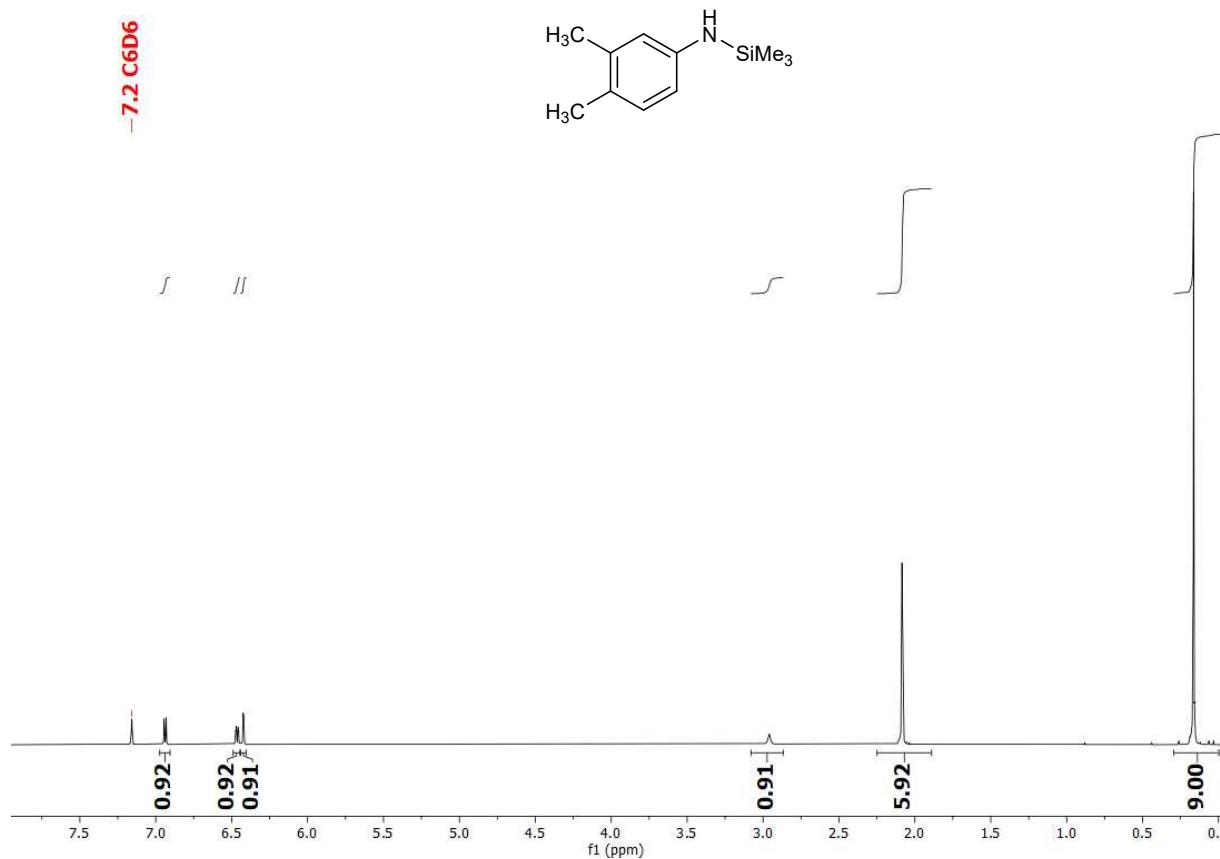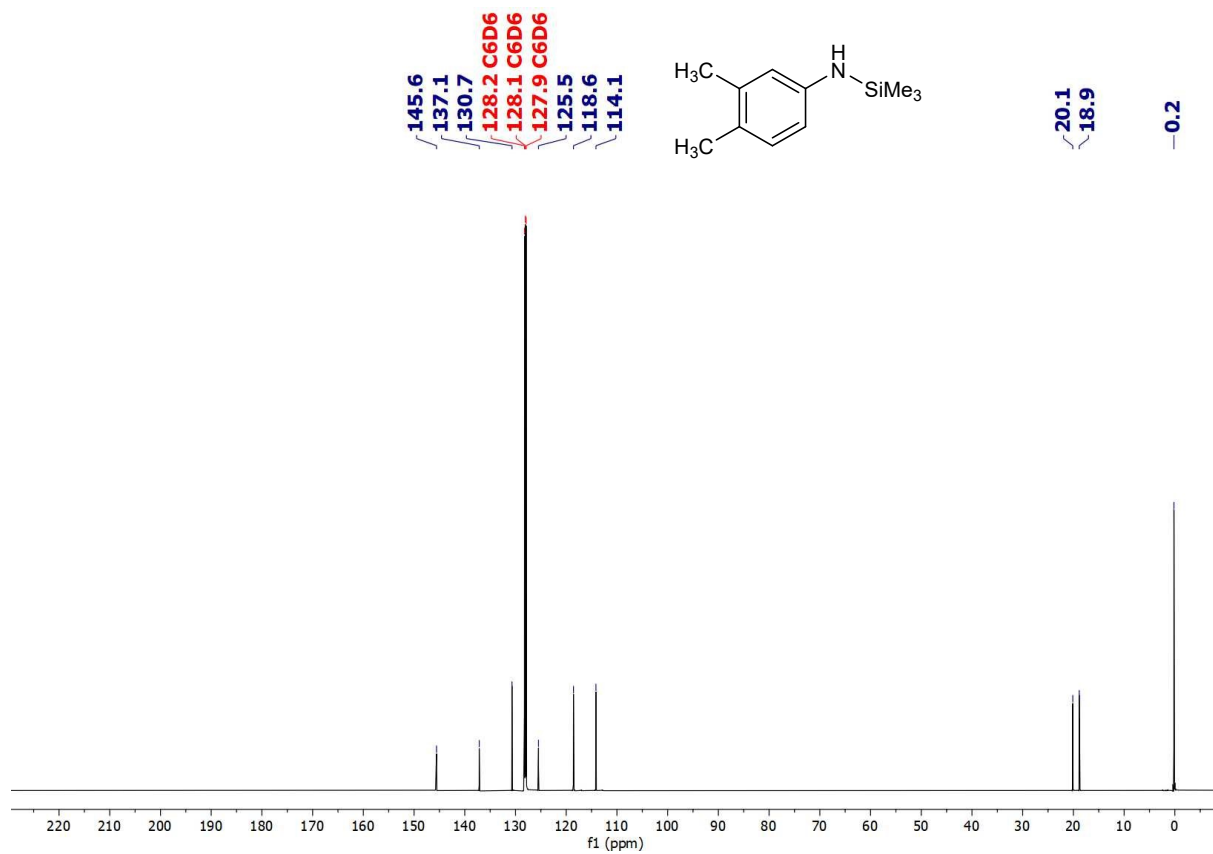

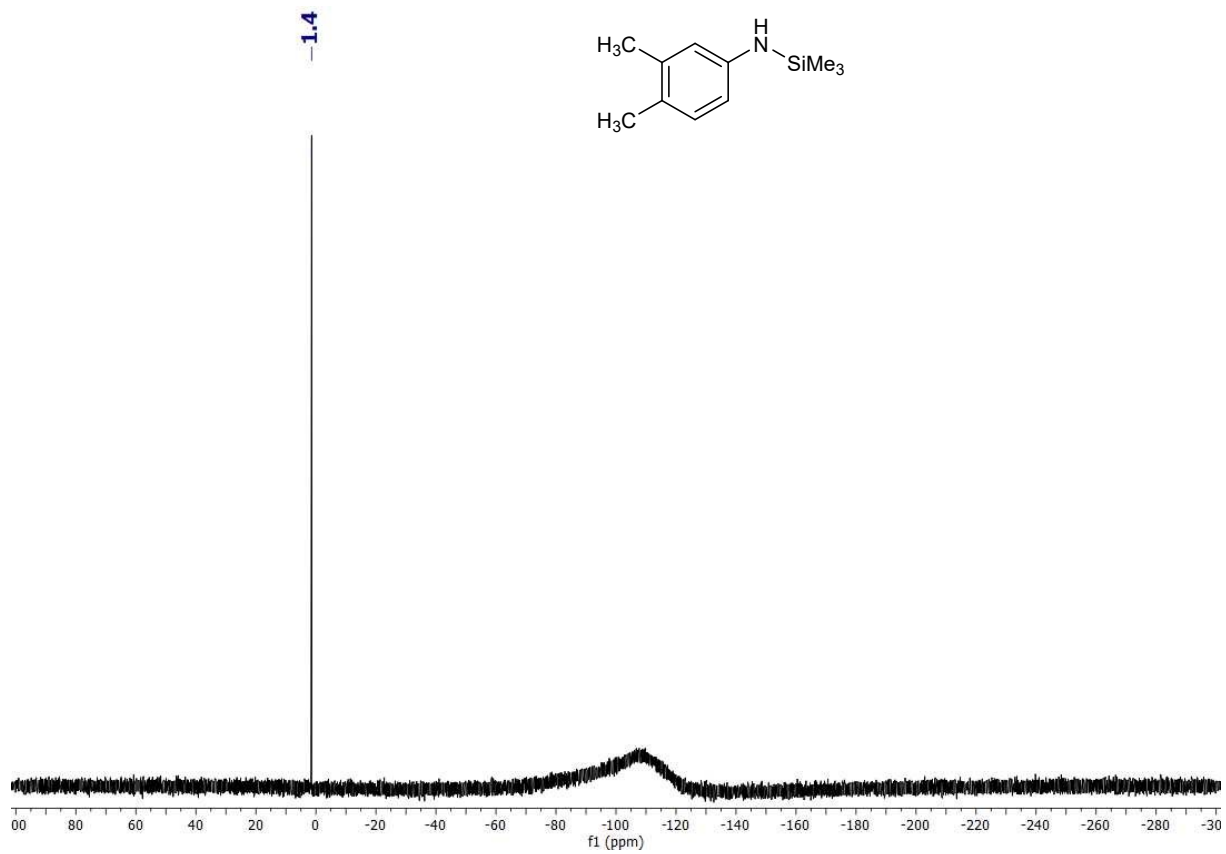



# 1,1,1-Trimethyl-N-(4-vinylphenyl)silanamine (3e)

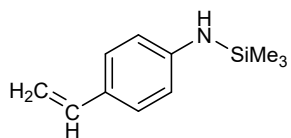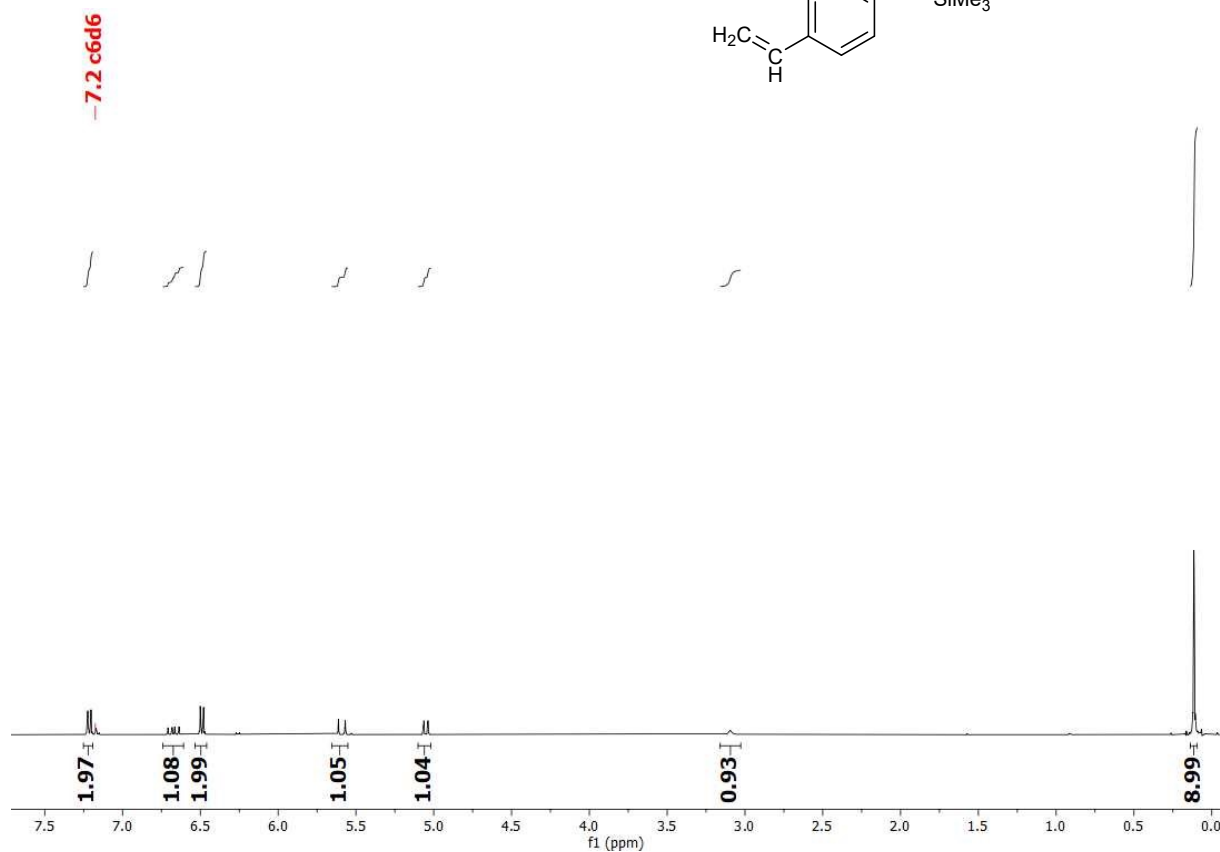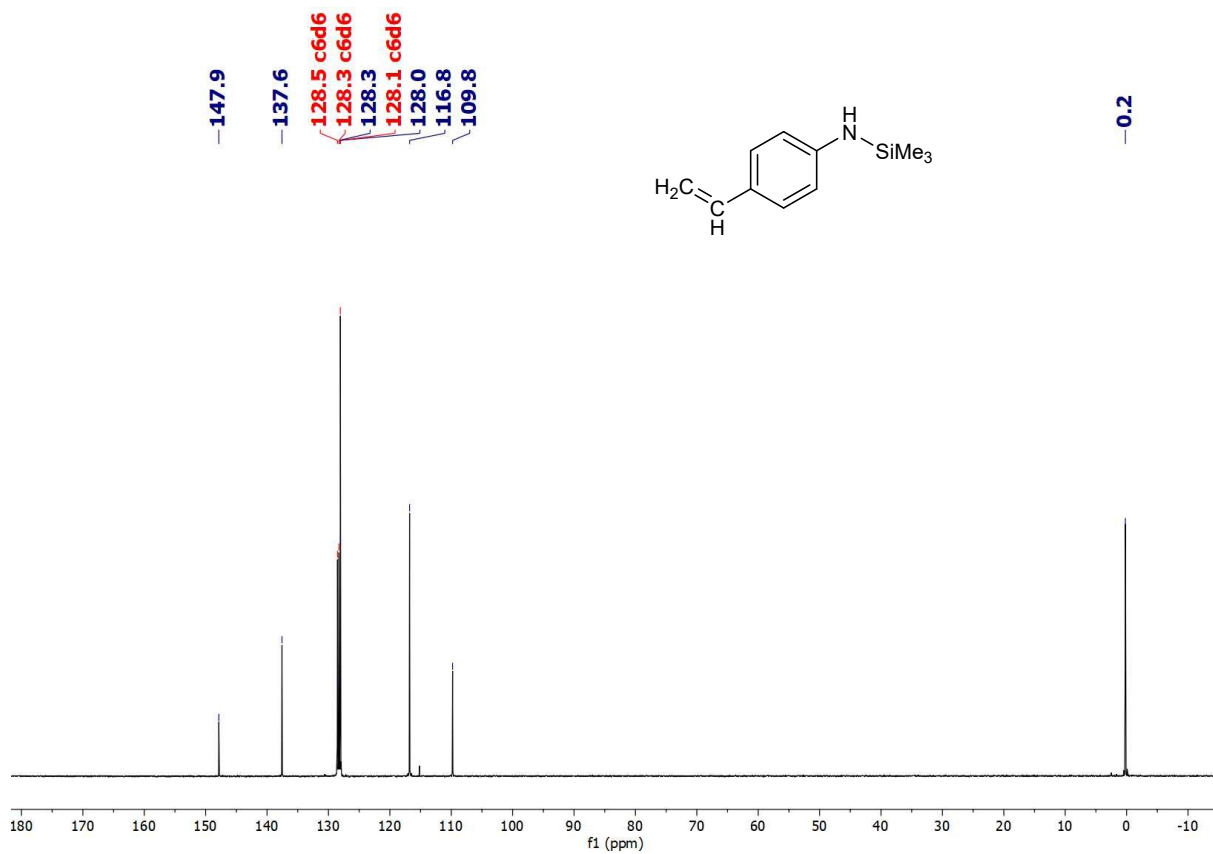

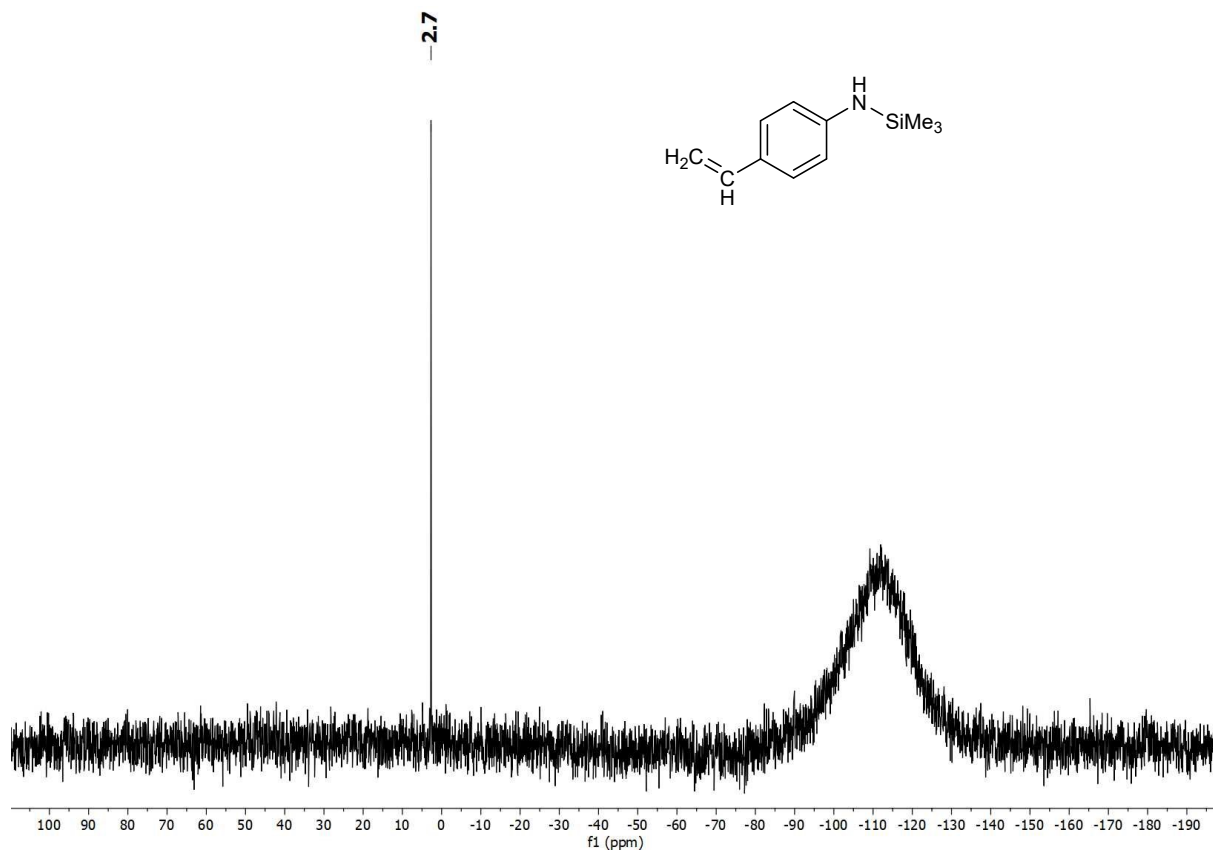

# 1,1,1-Trimethyl-N-(2-(prop-1-en-2-yl)phenyl)silanamine (3f)

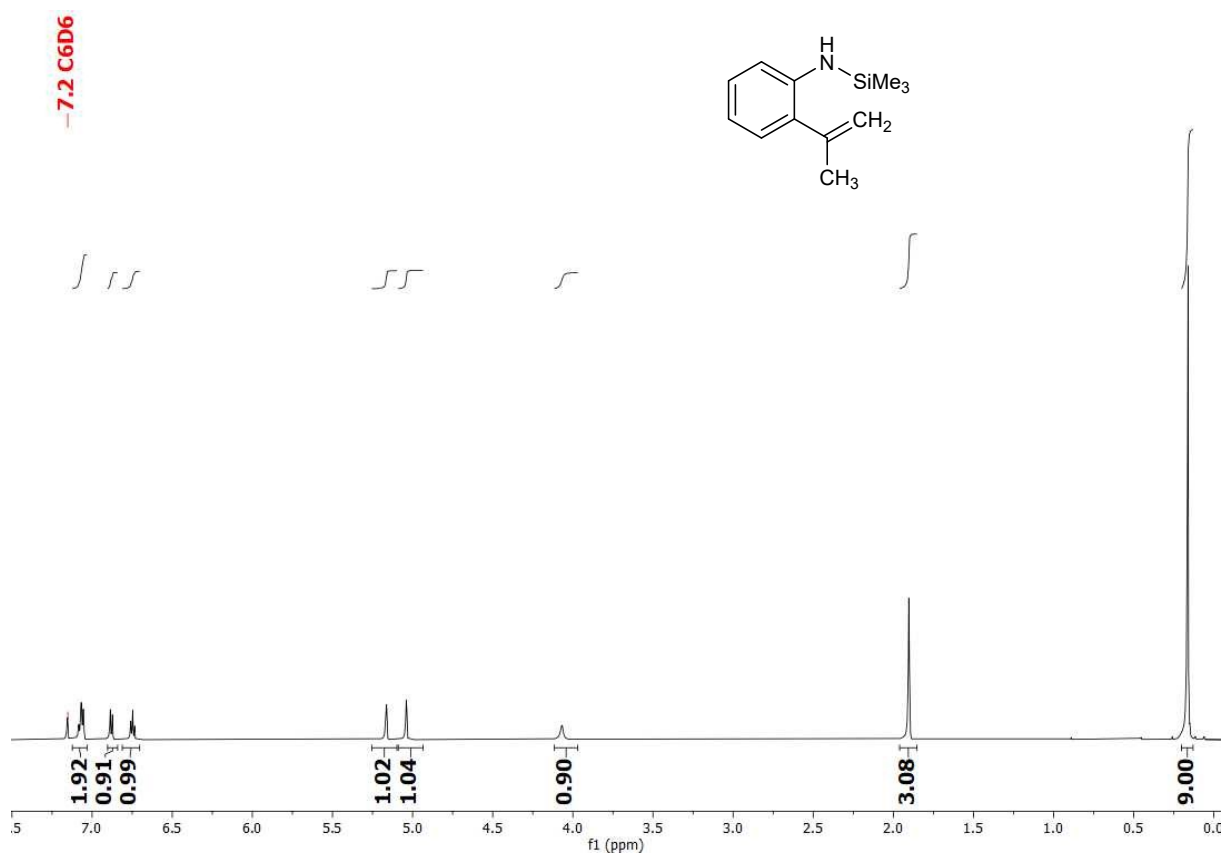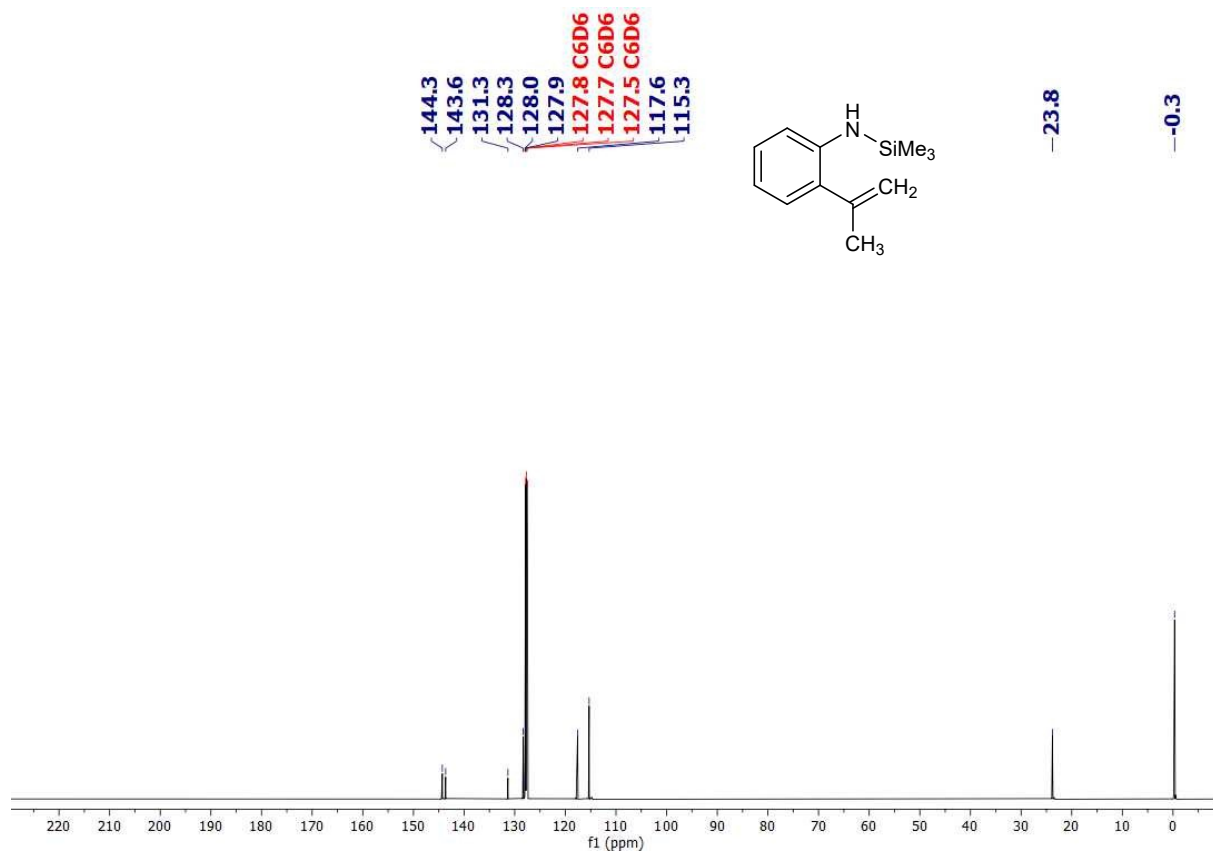

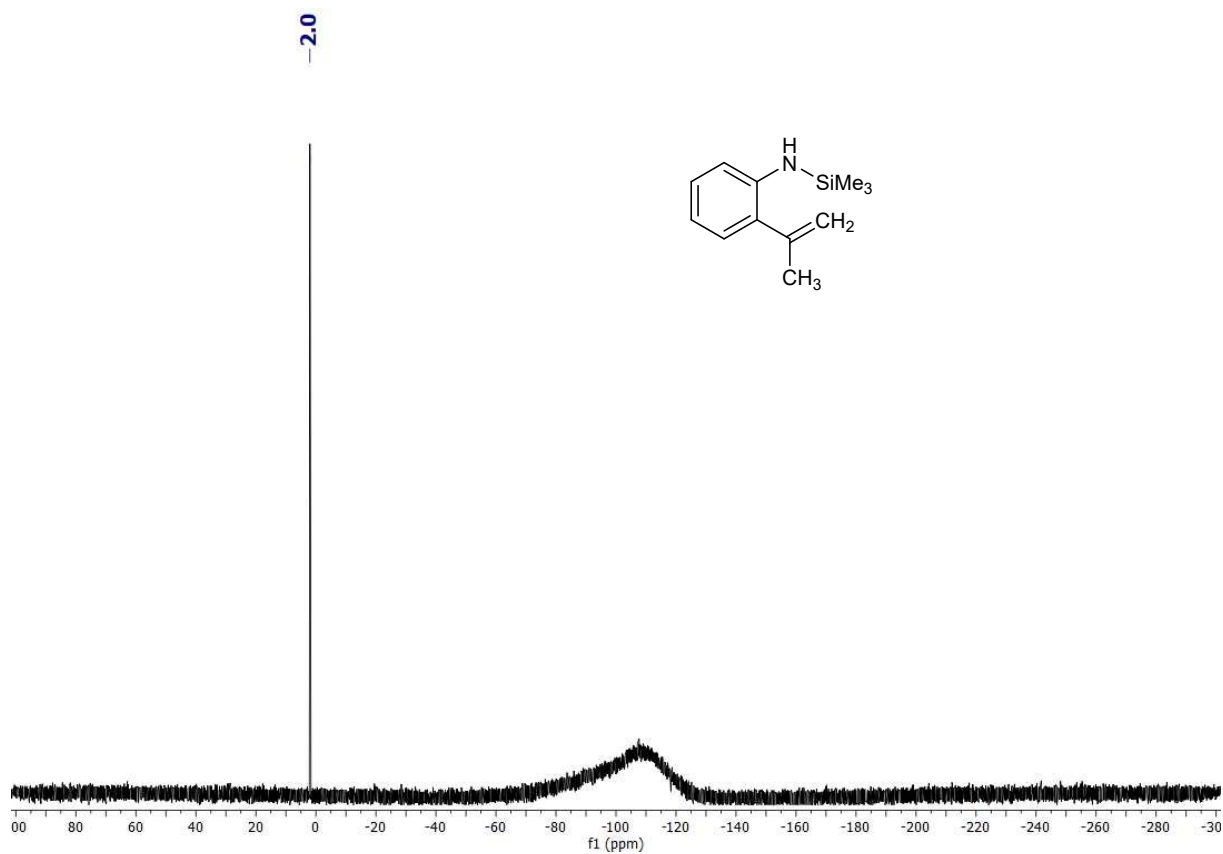

# 4-((Trimethylsilyl)amino)benzonitrile (3g)

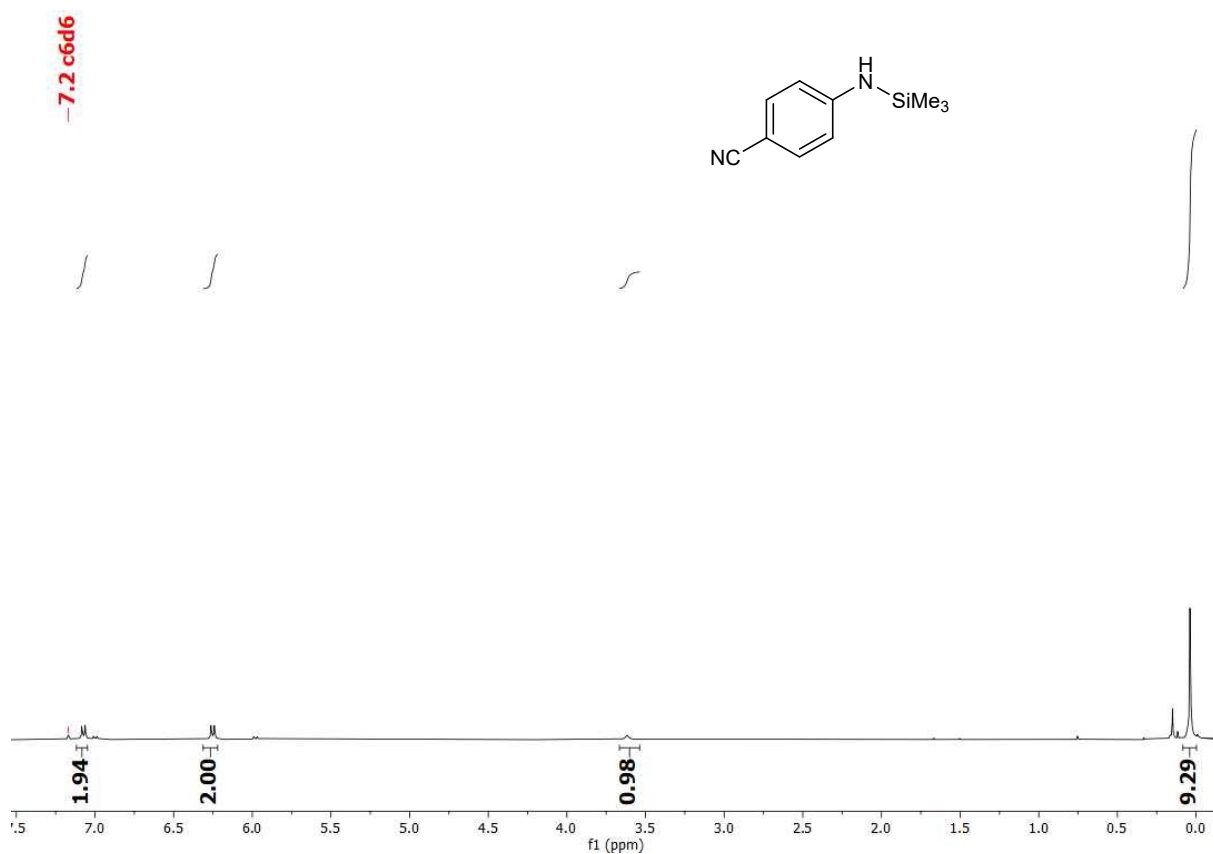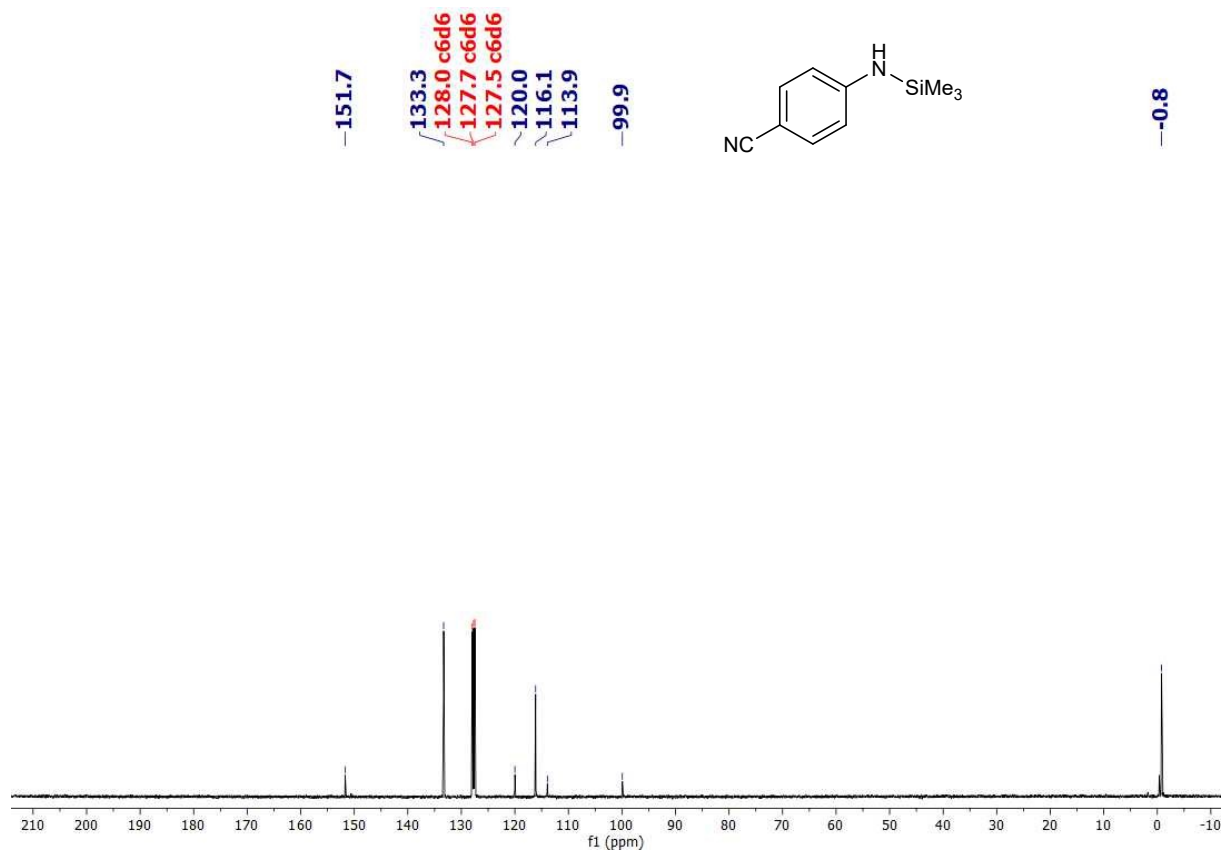

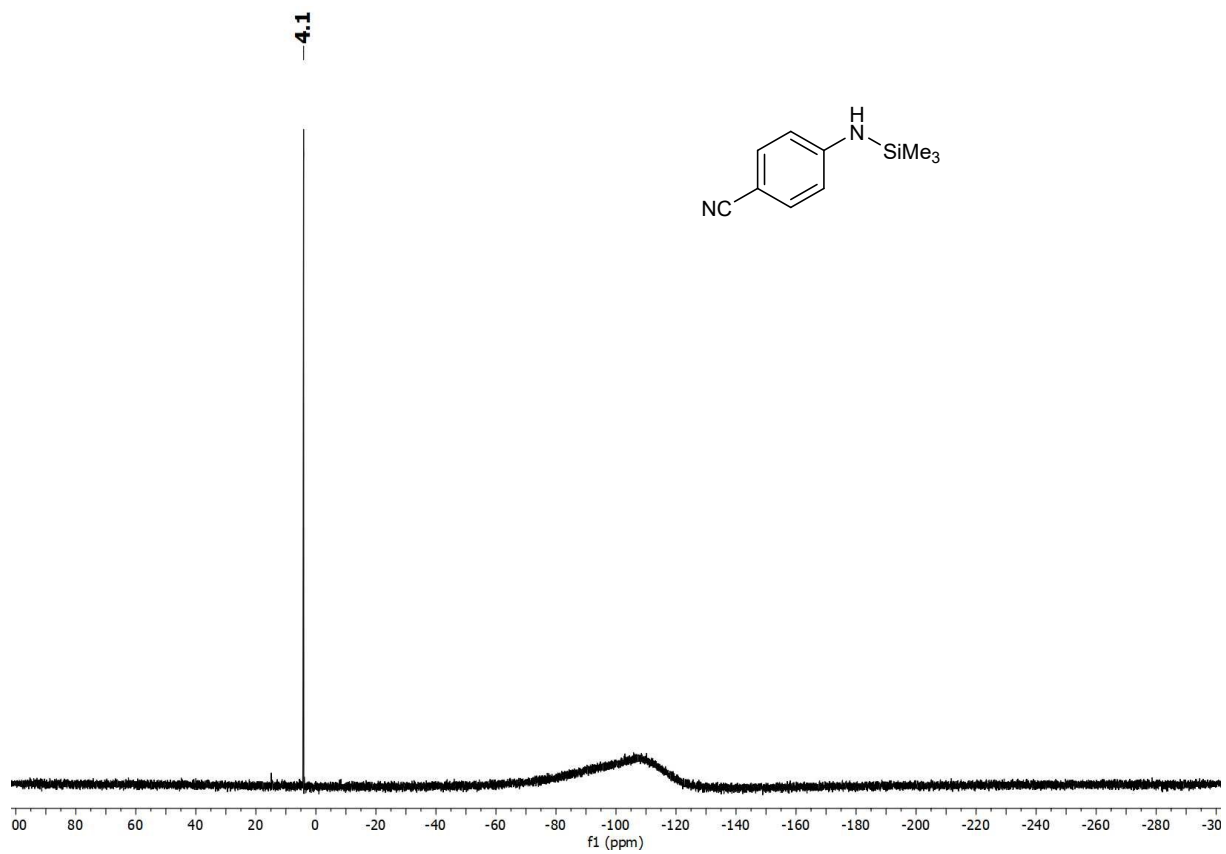

# N-(4-bromophenyl)-1,1,1-trimethylsilanamine (3h)

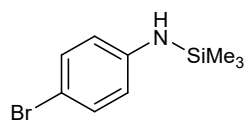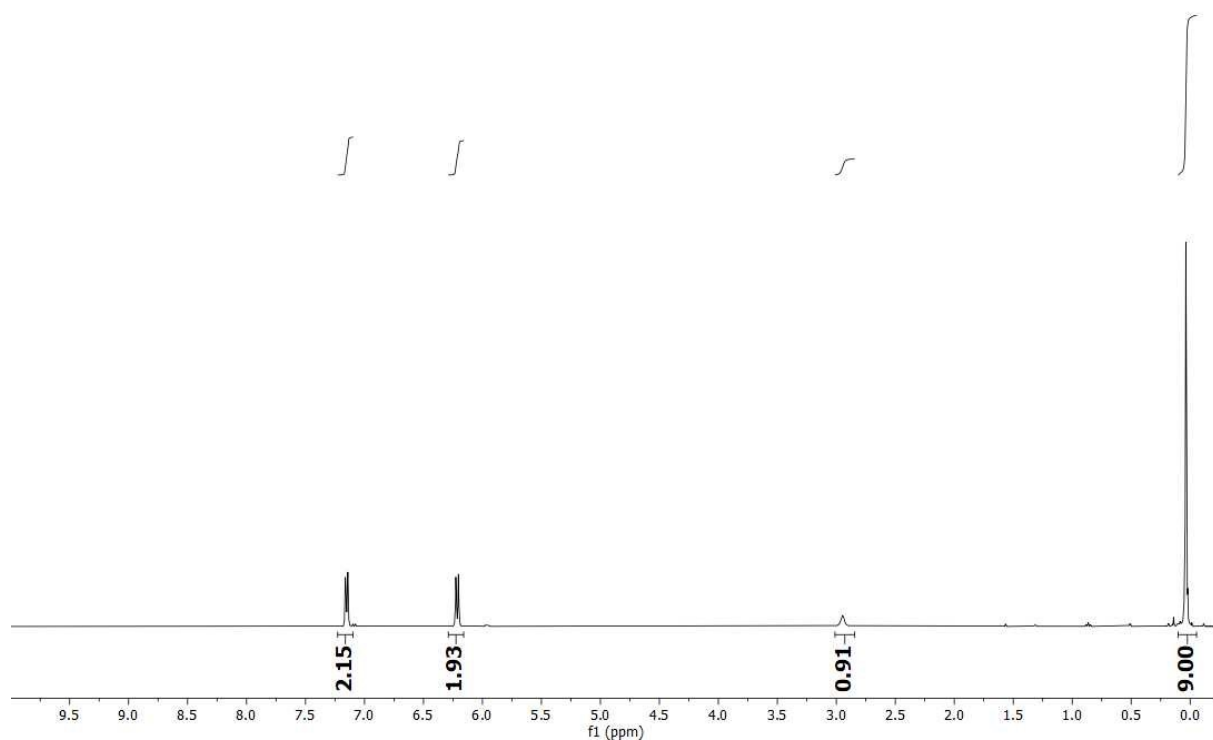

147.0  
132.5  
128.5 c6d6  
128.3 c6d6  
128.1 c6d6  
118.4  
110.0  
109.9

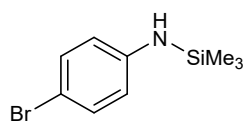

0.0

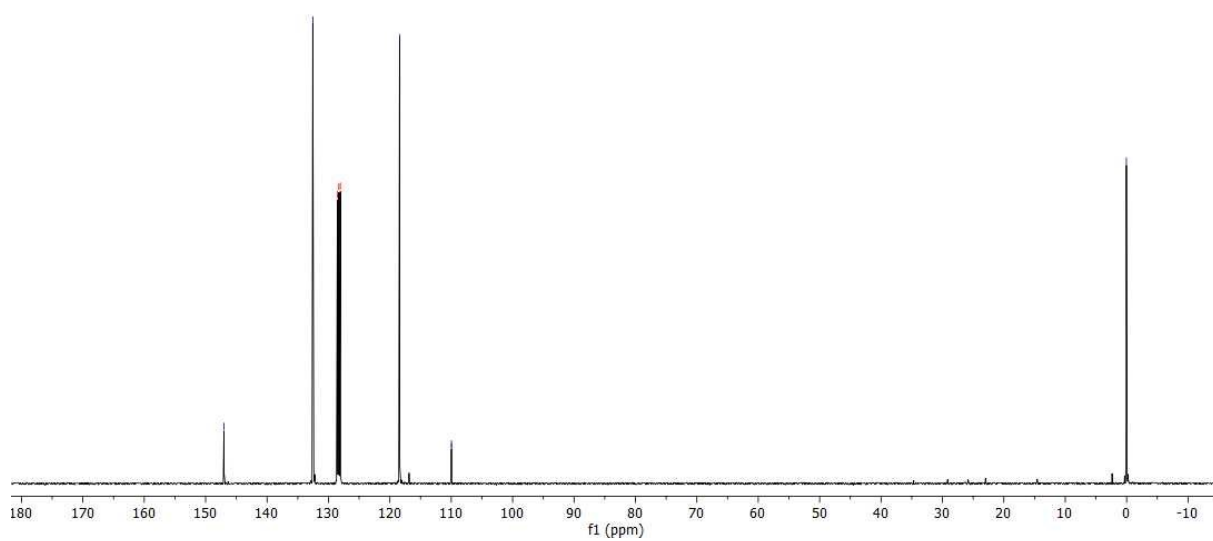

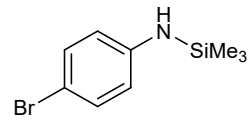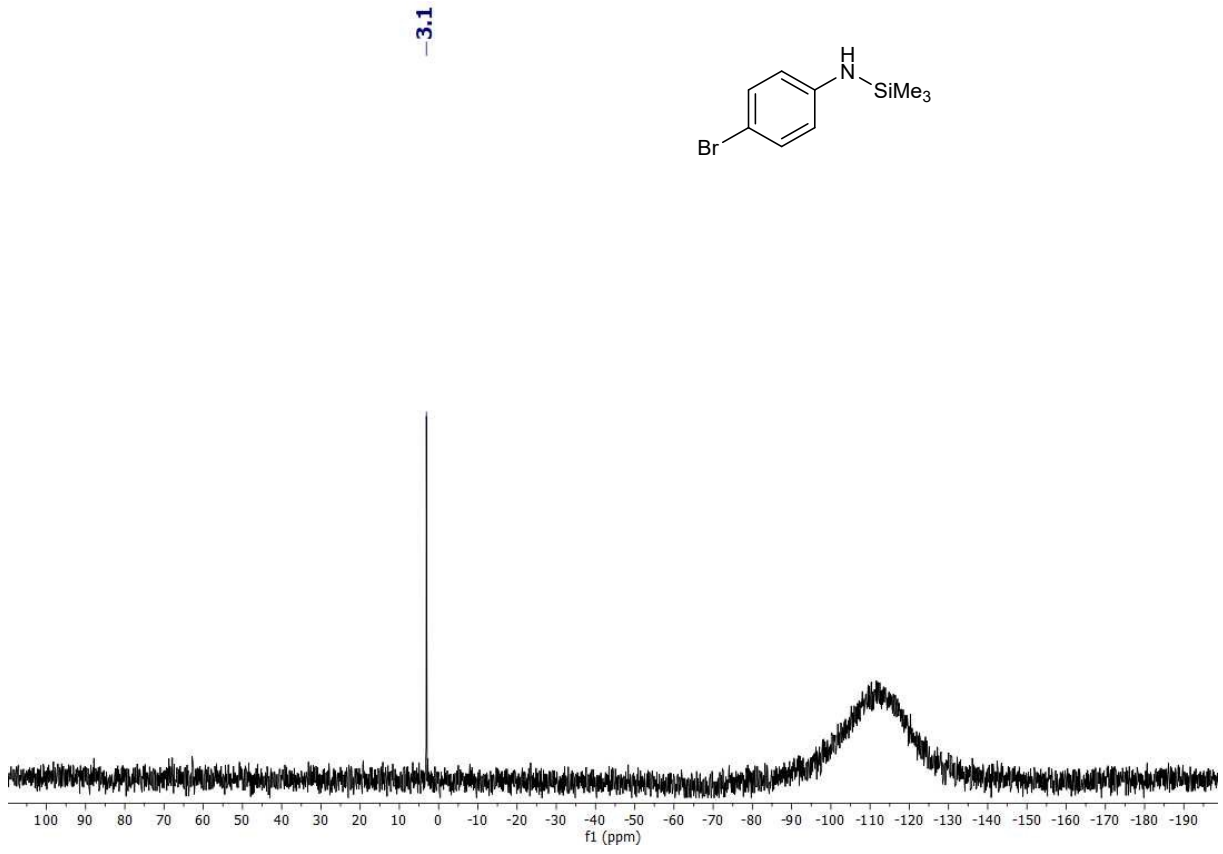



# N-(4-iodophenyl)-1,1,1-trimethylsilanamine (3i)

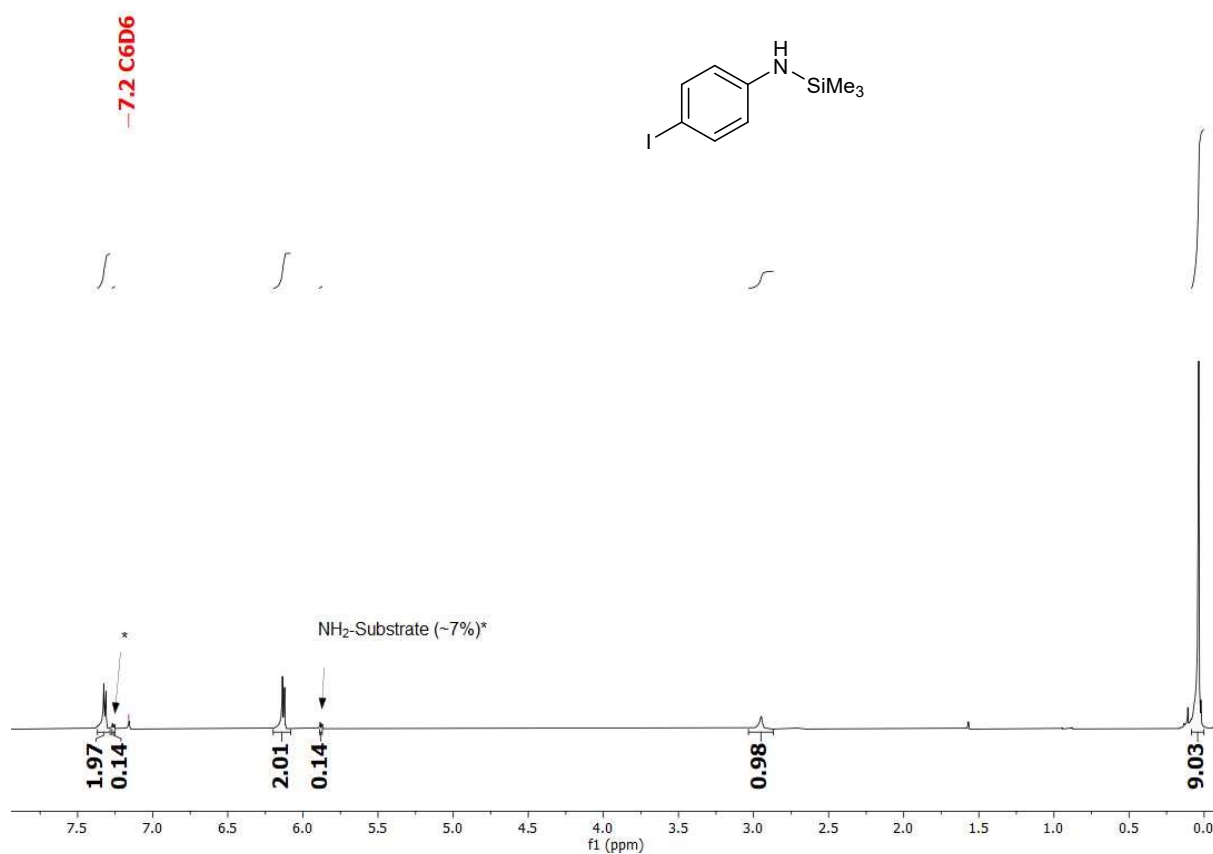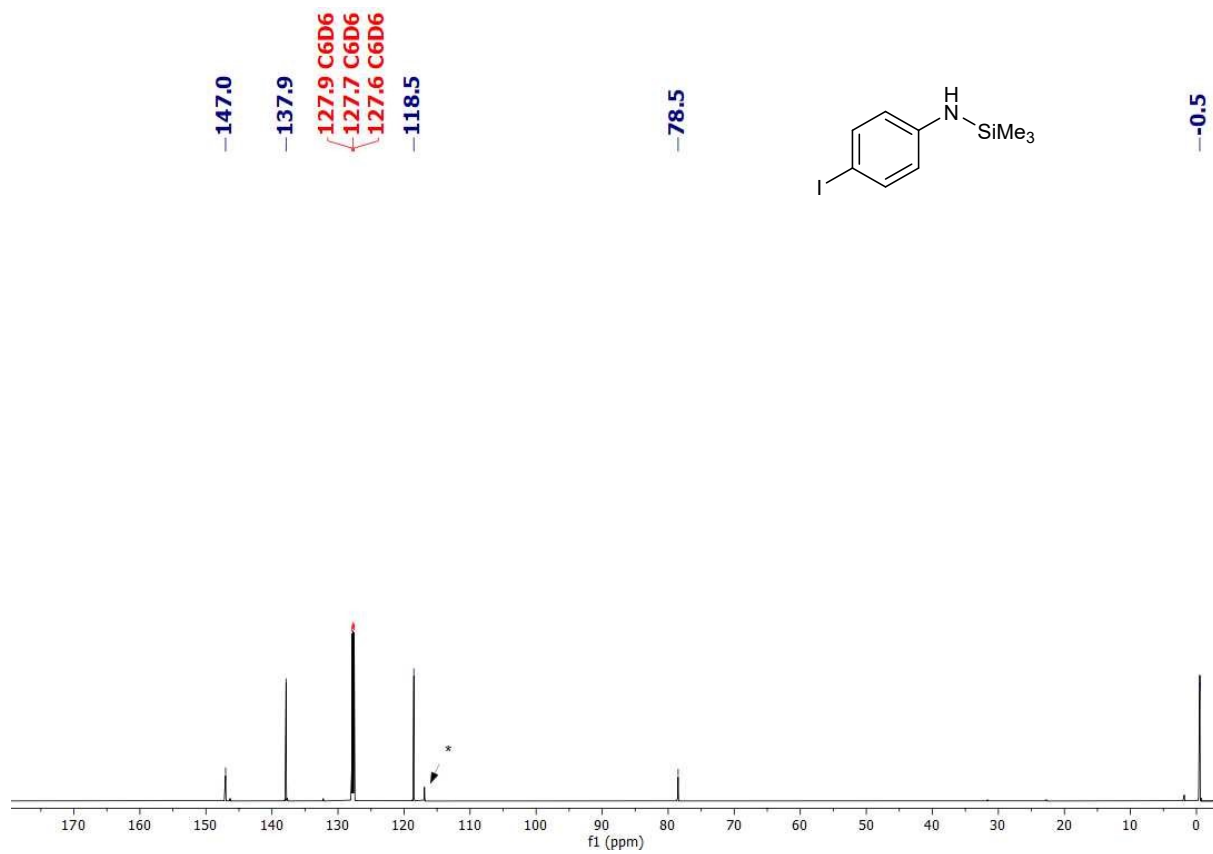

-2.7

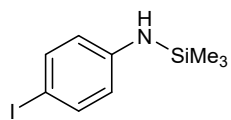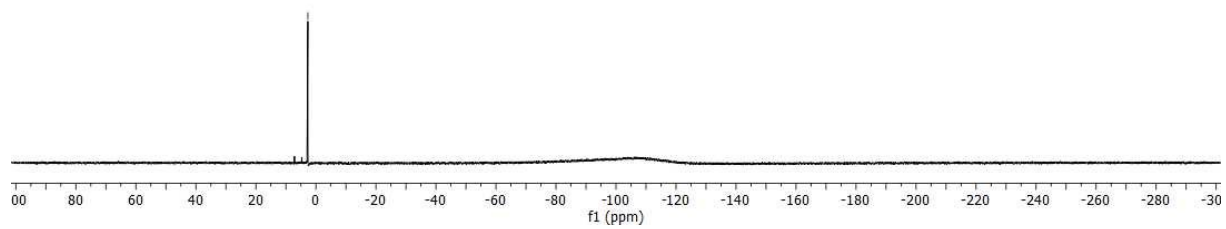

# 1,1,1-Trimethyl-N-(4-((trifluoromethyl)thio)phenyl)silanamine (3j)

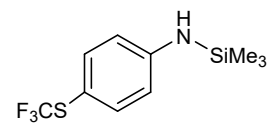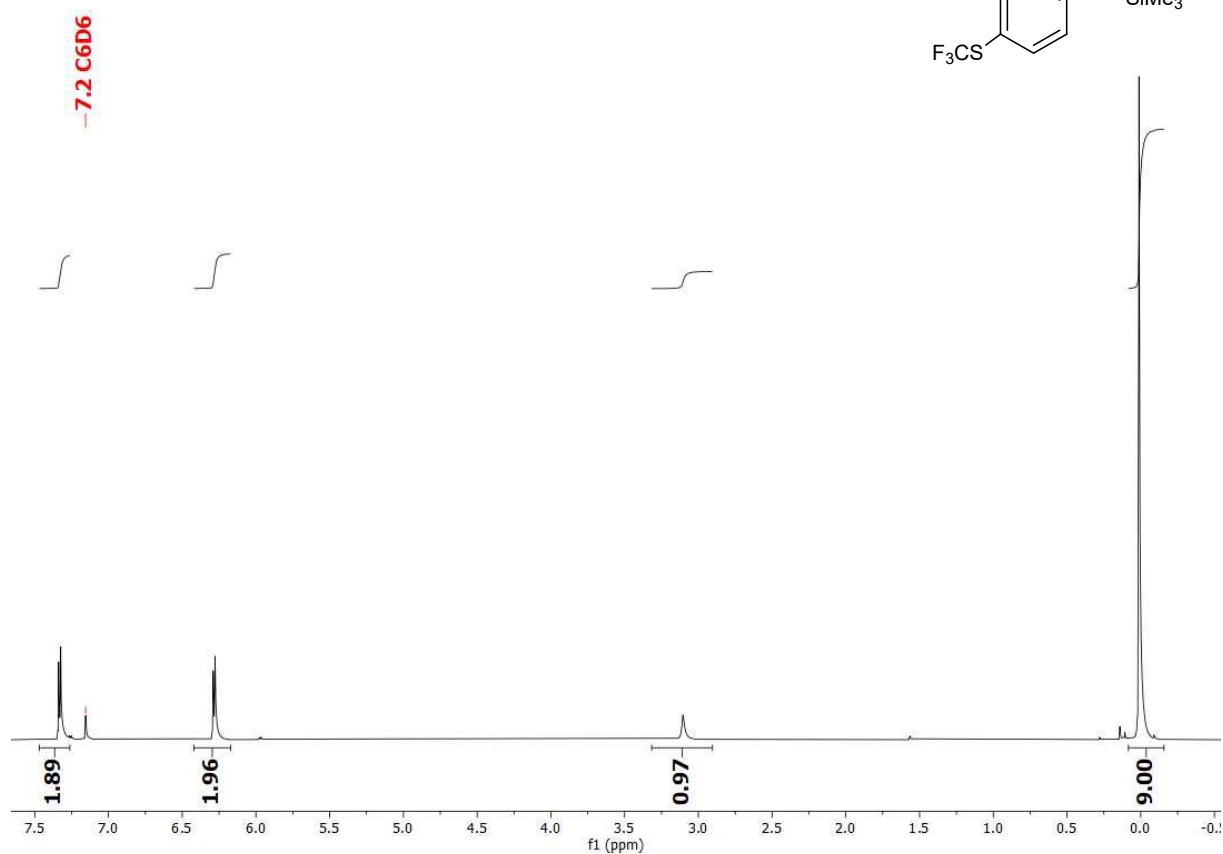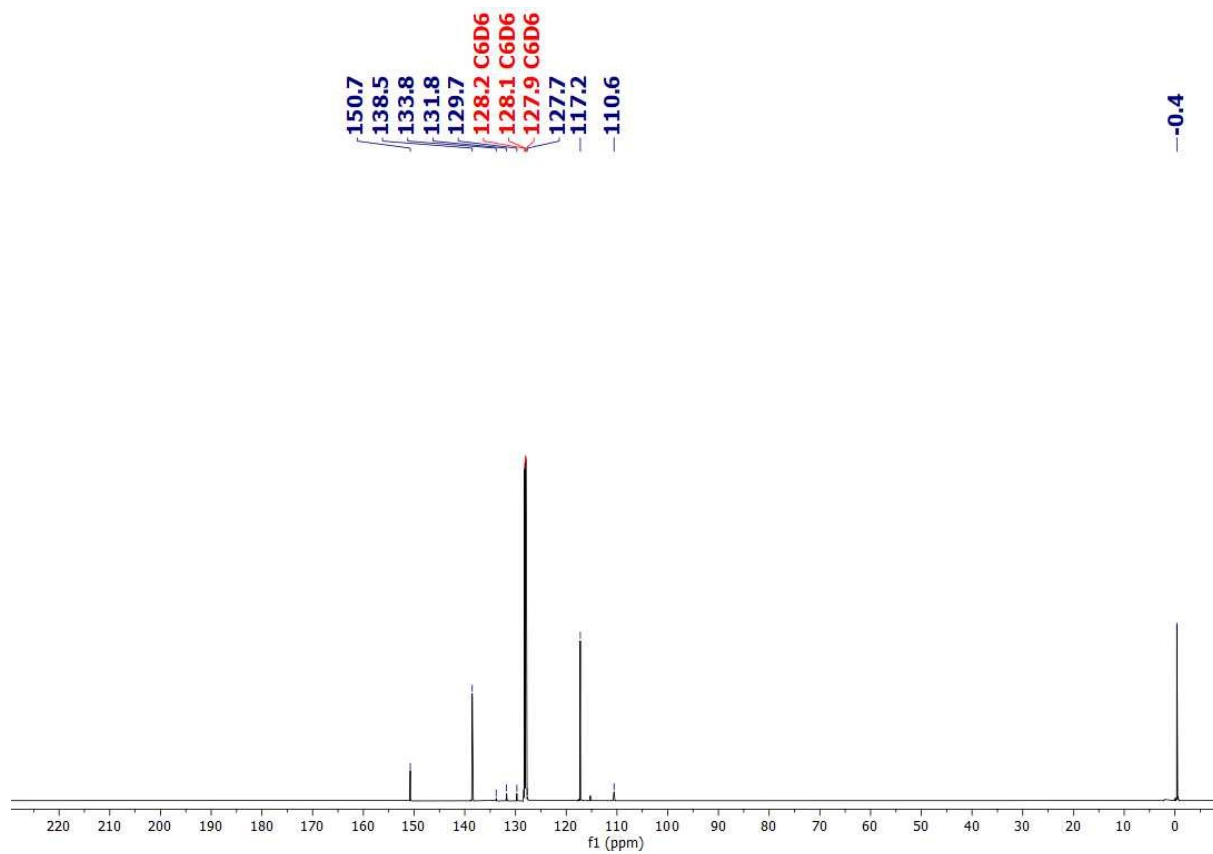

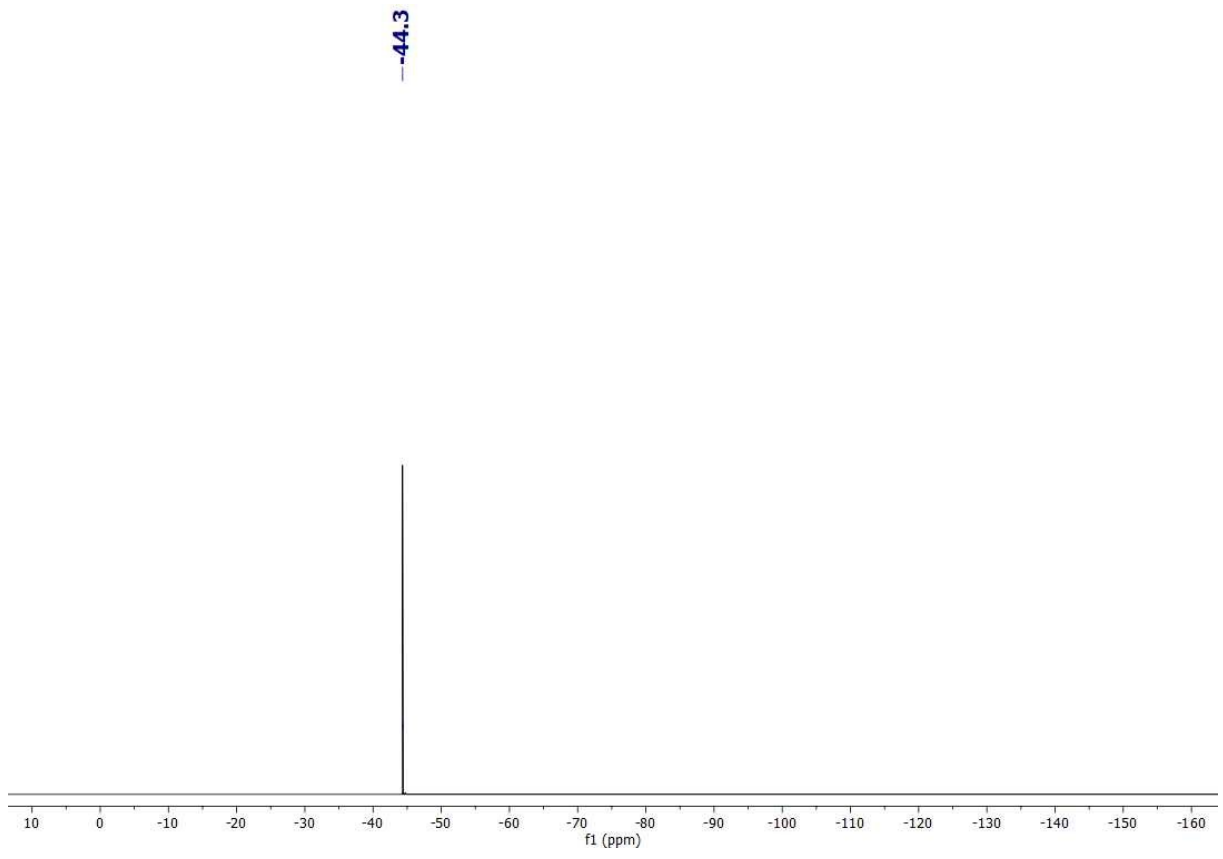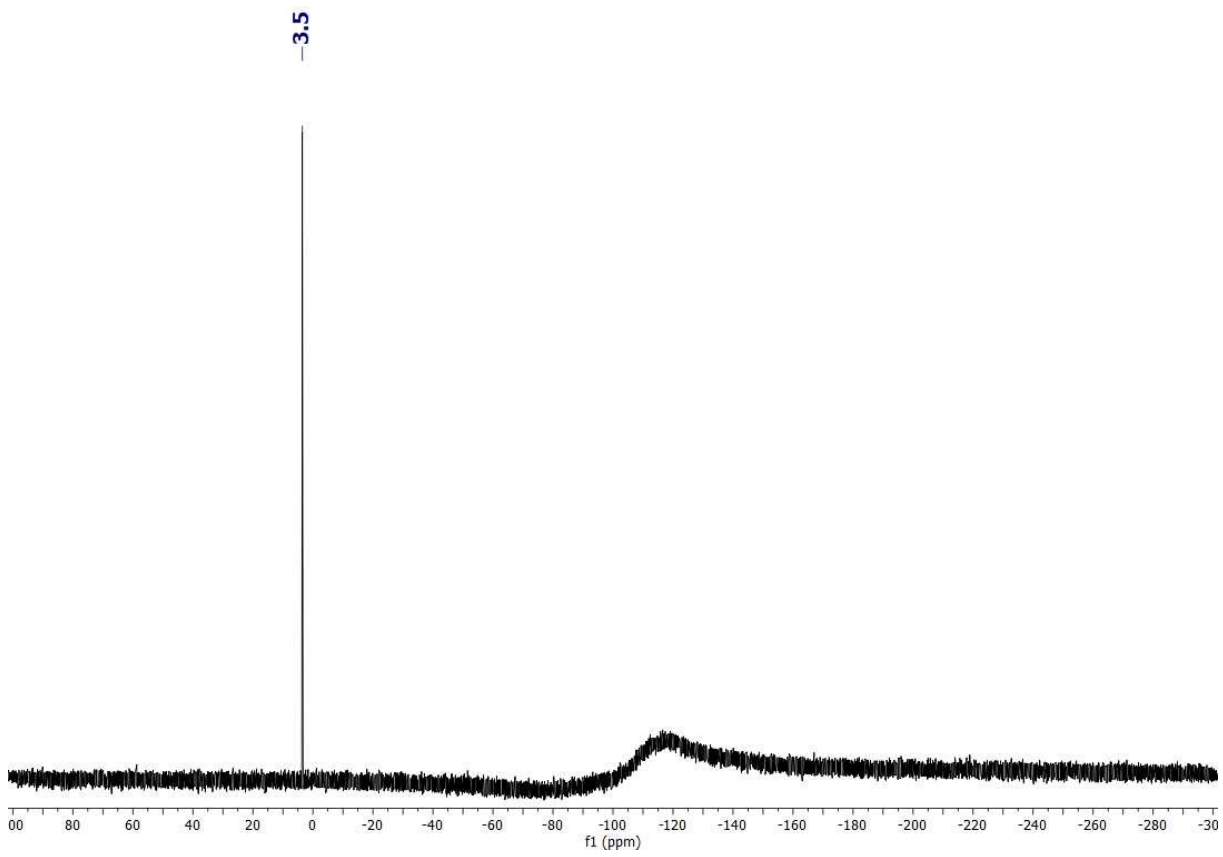

1,1,1-Trimethyl-N-(4-(trifluoromethoxy)phenyl)silanamine (3k)

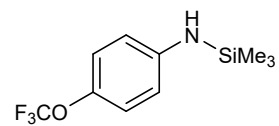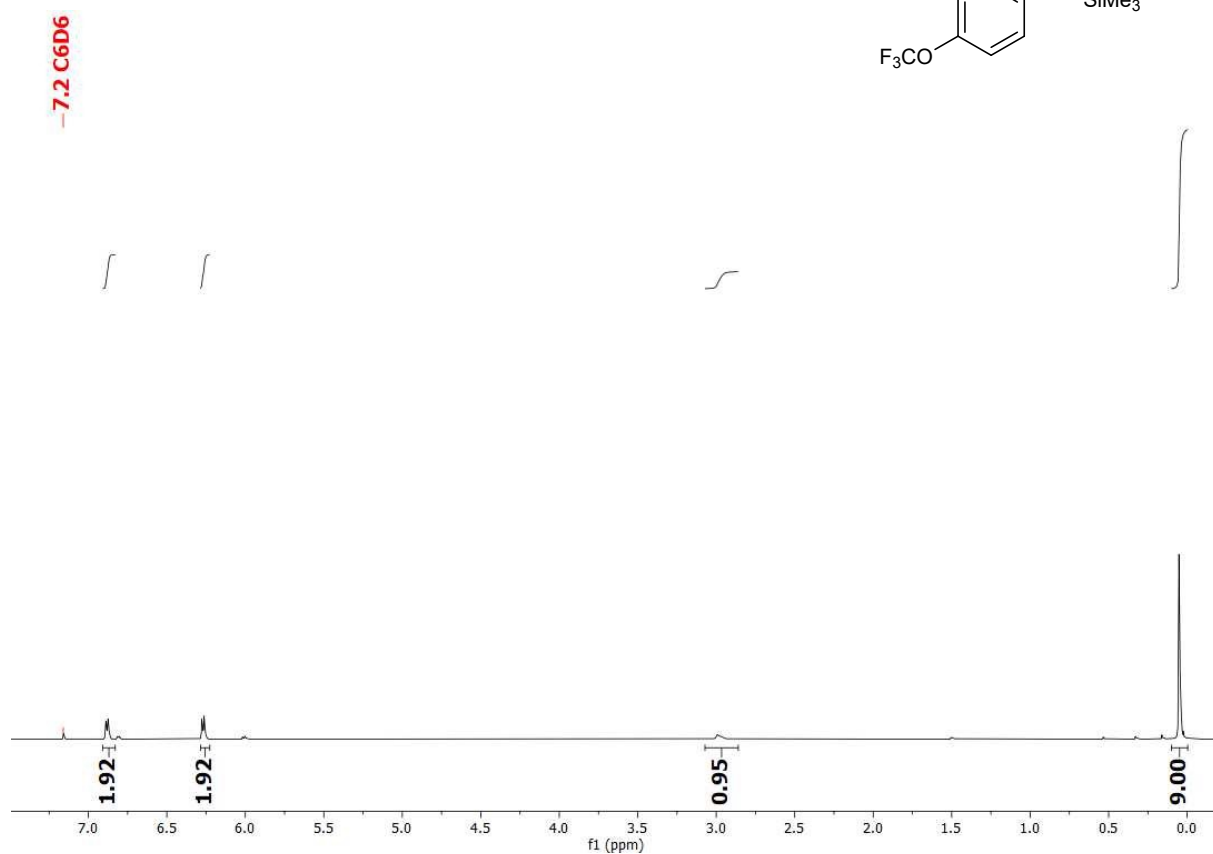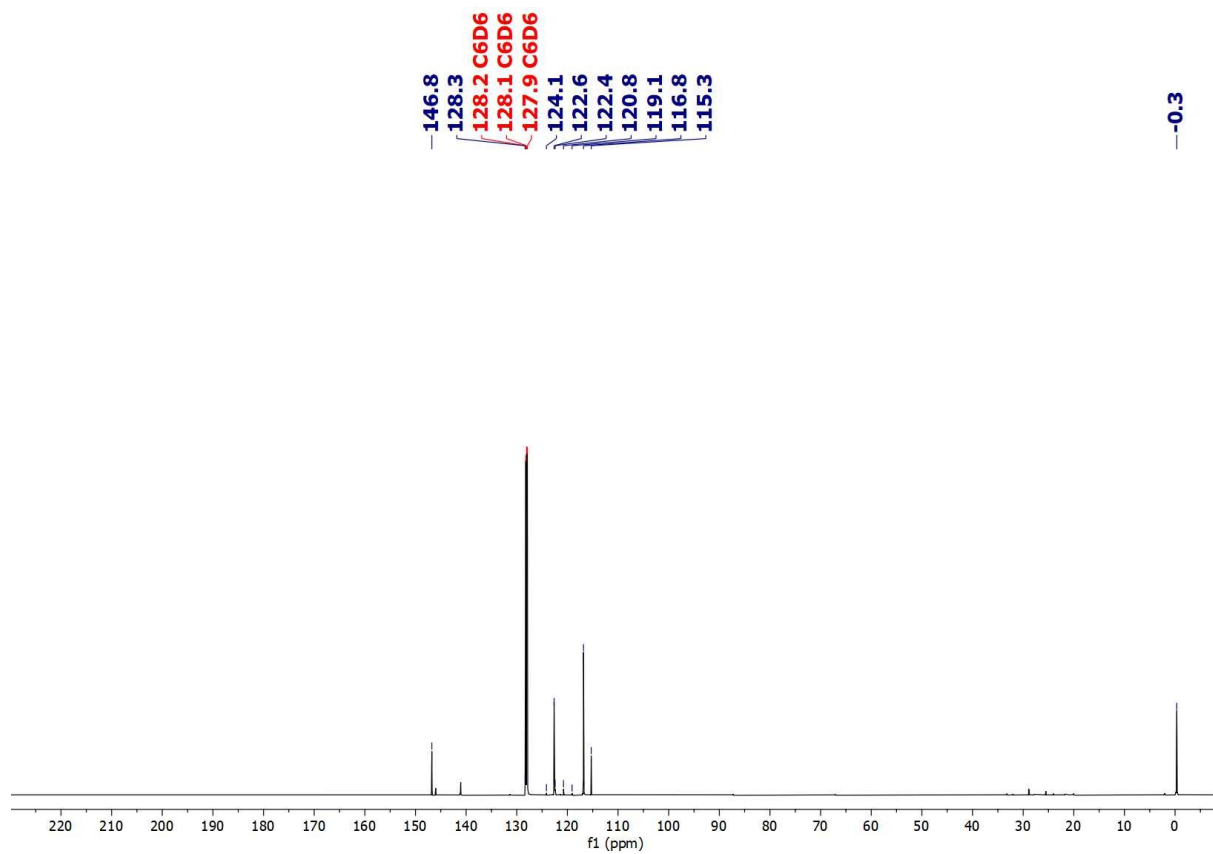

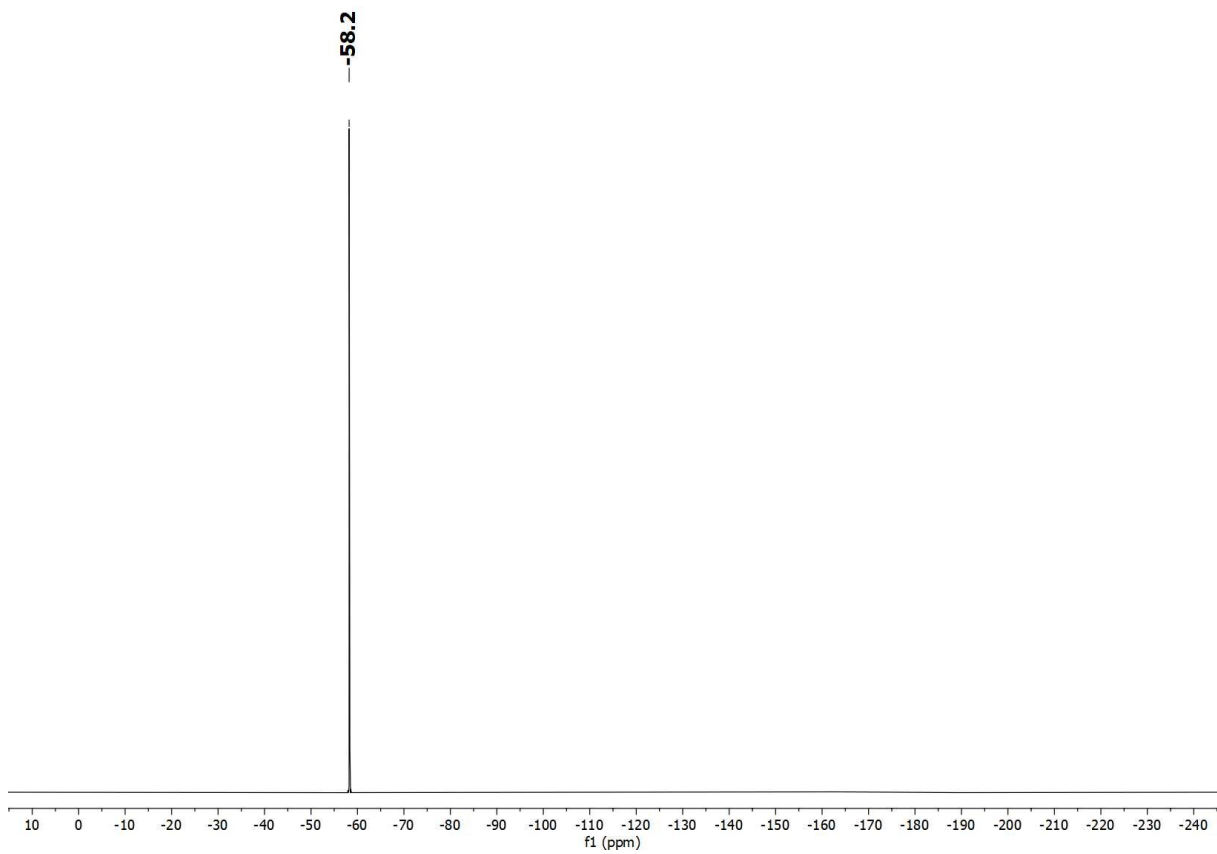

-2.8

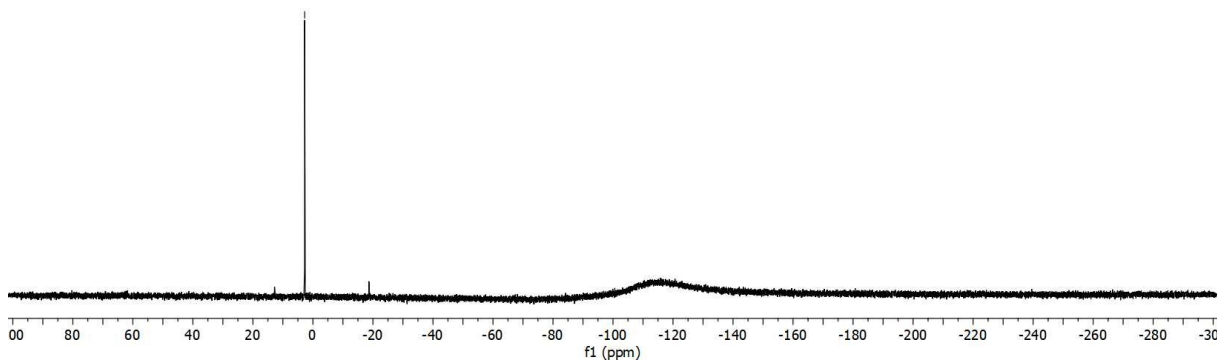

# N-(4-(difluoromethoxy)phenyl)-1,1,1-trimethylsilanamine (3I)

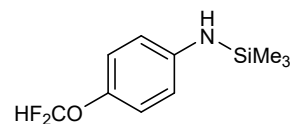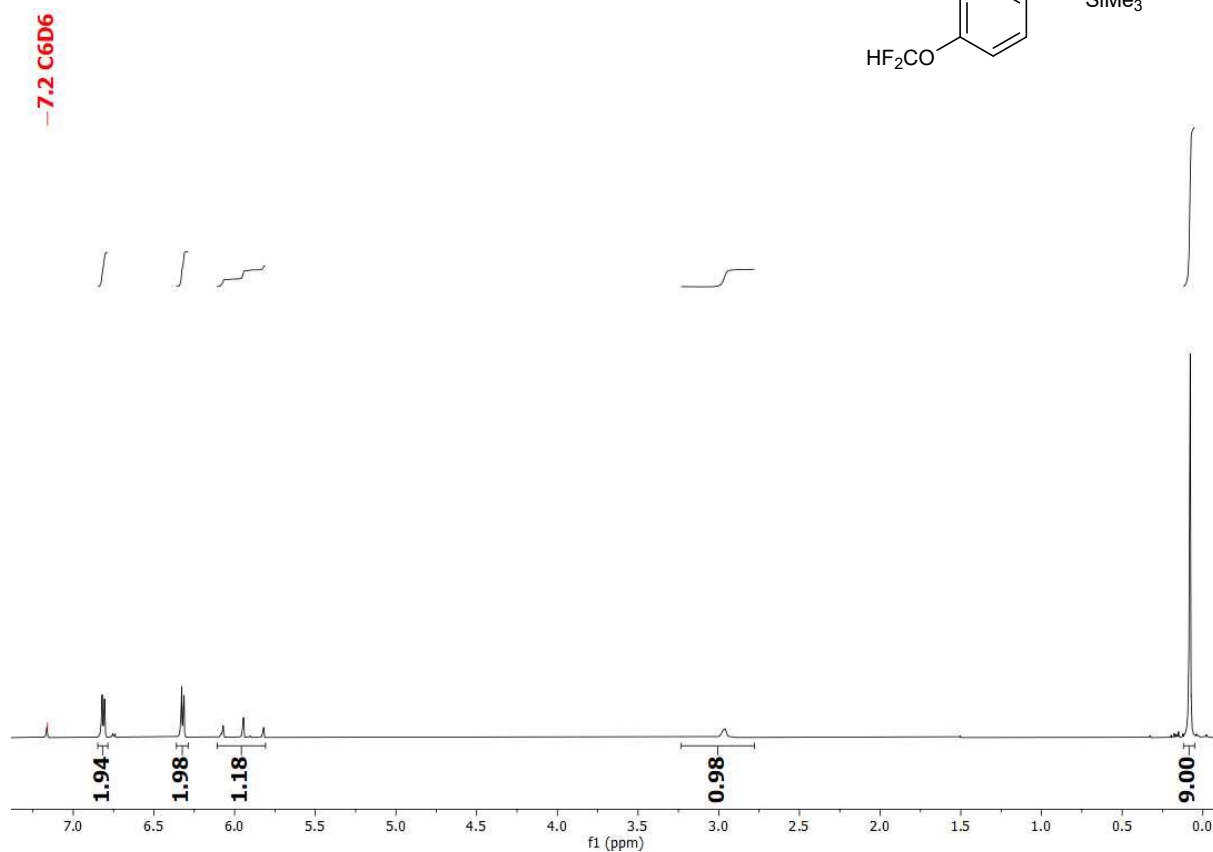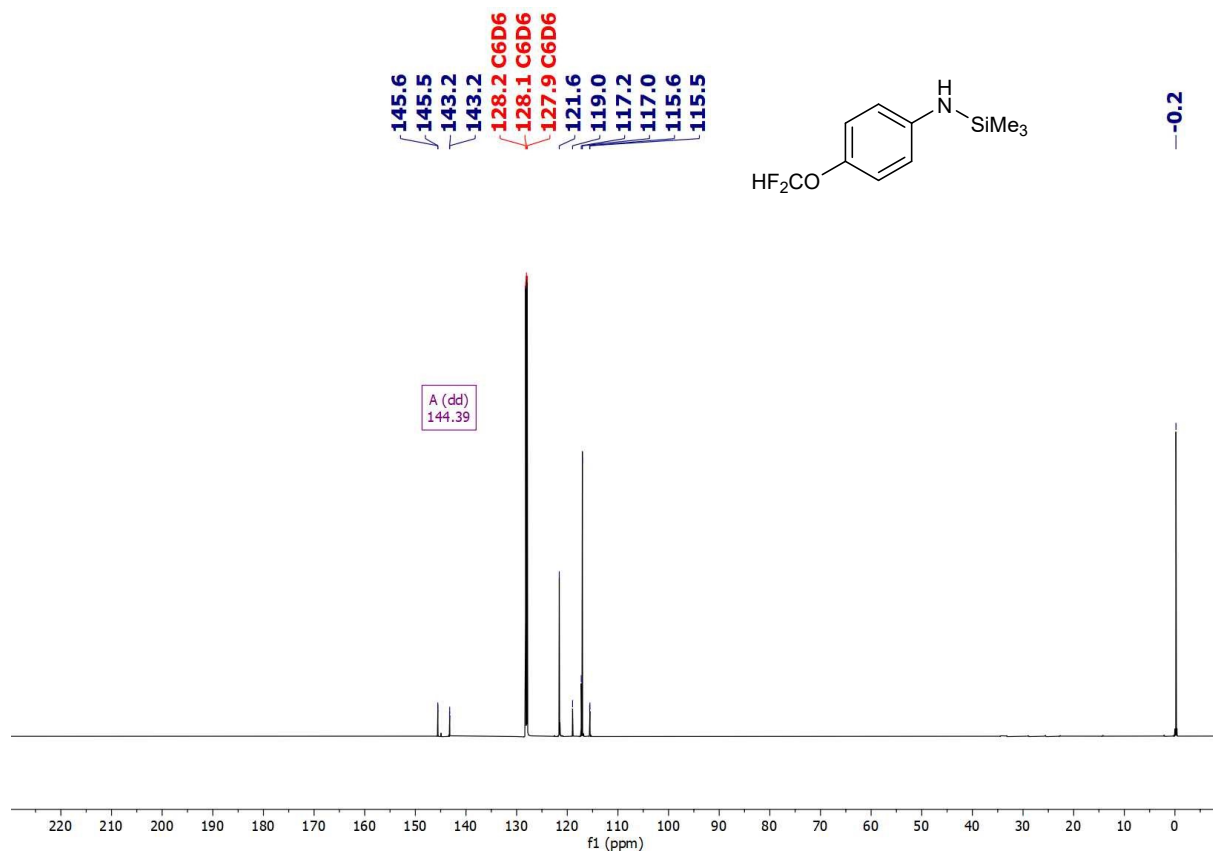

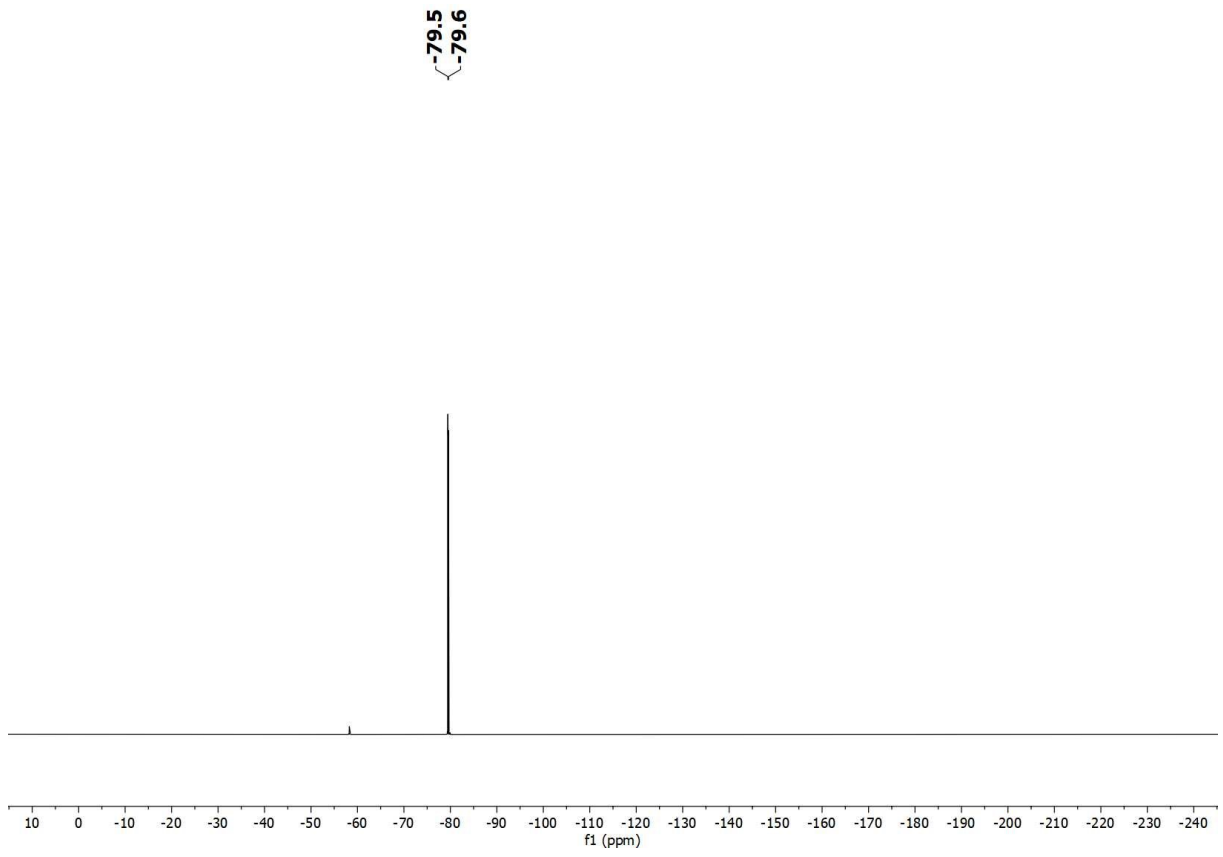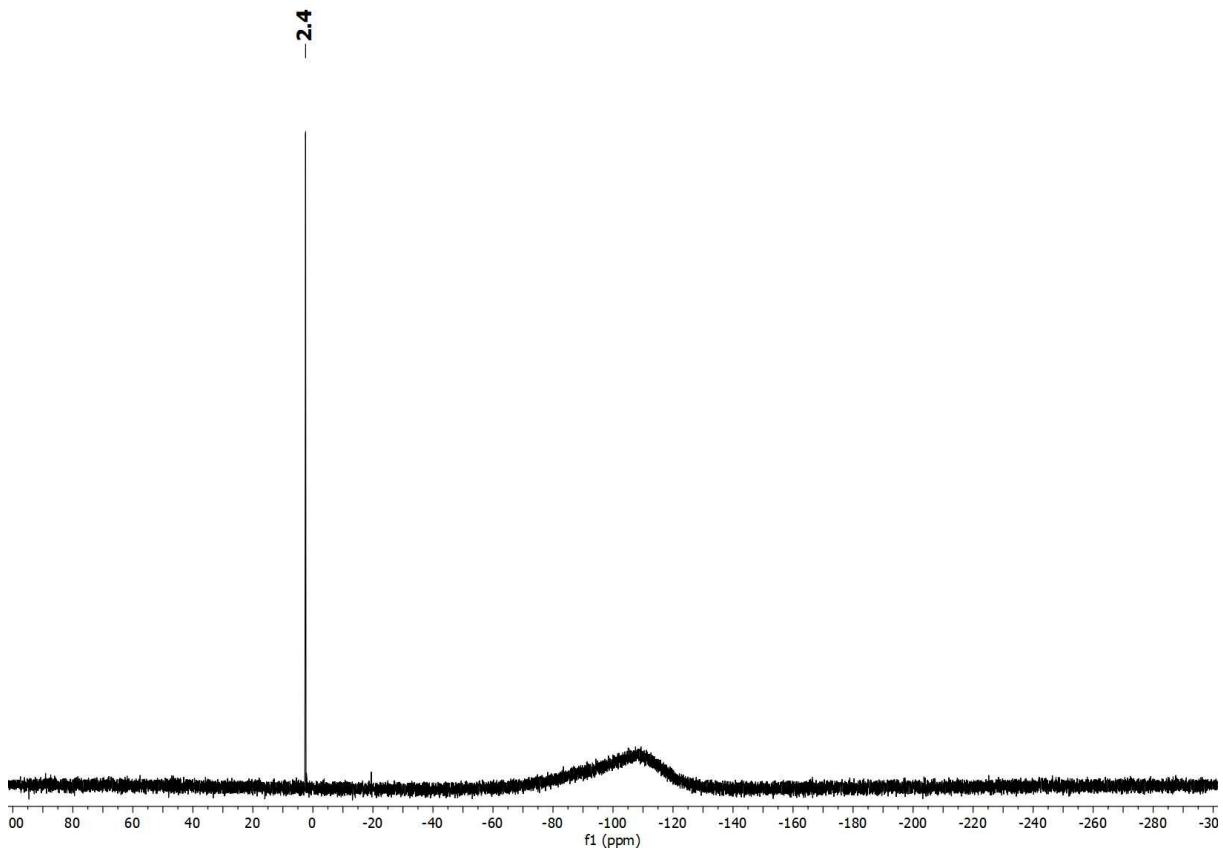



# 1,1,1-Trimethyl-N-(4-(trifluoromethyl)phenyl)silanamine (3m)

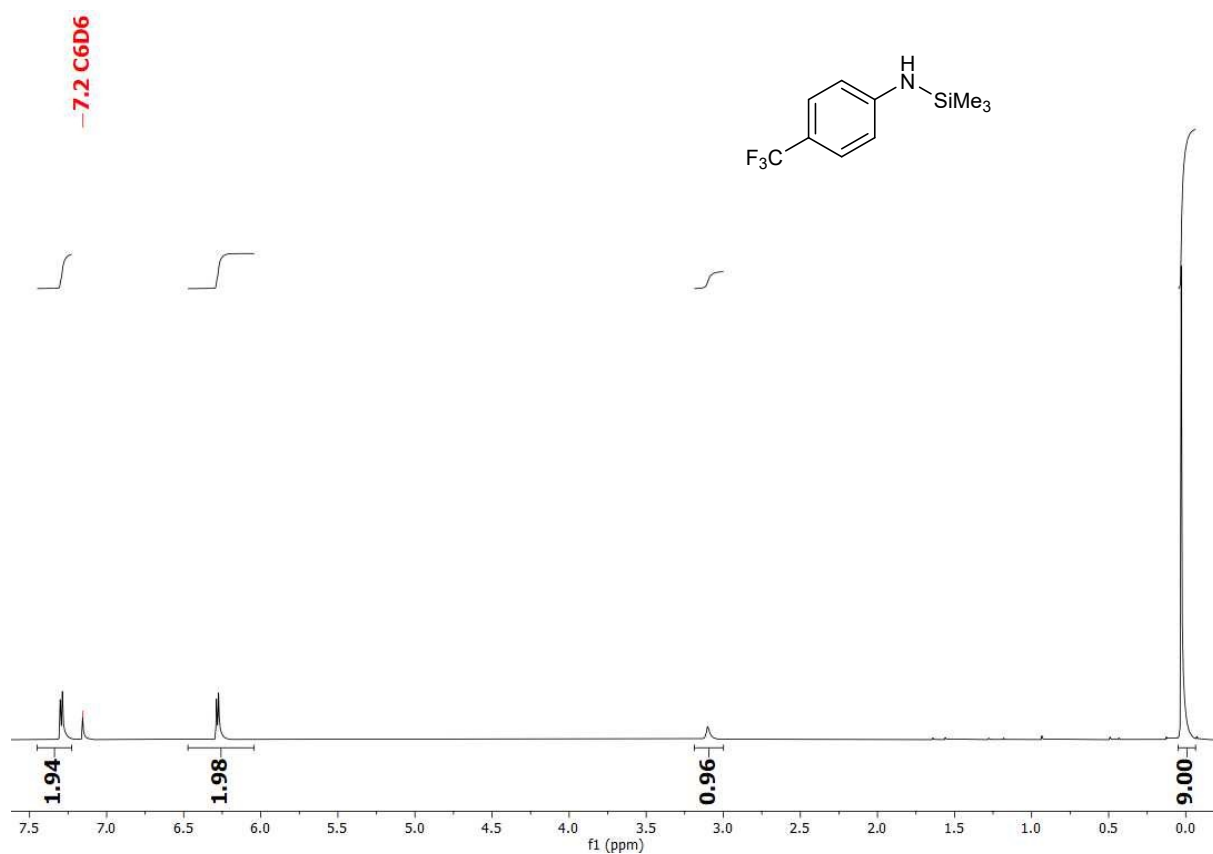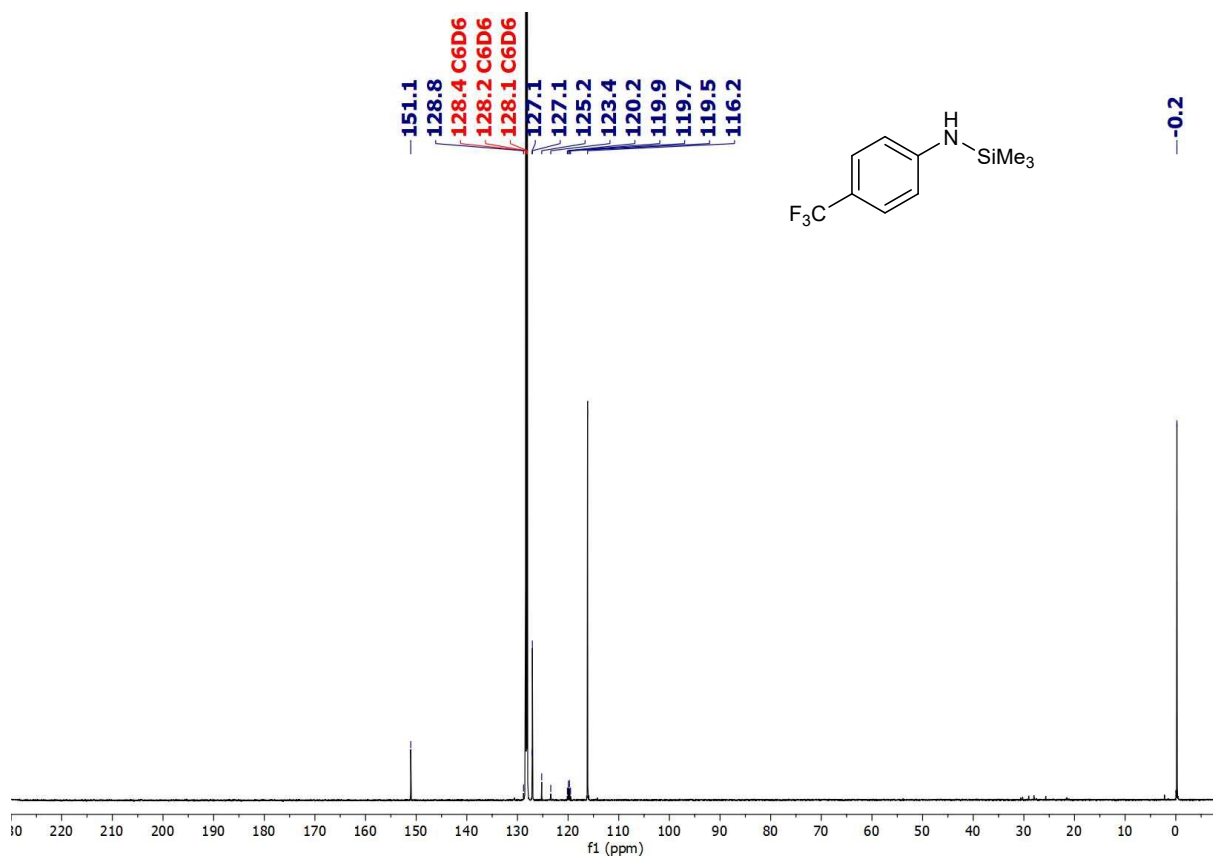

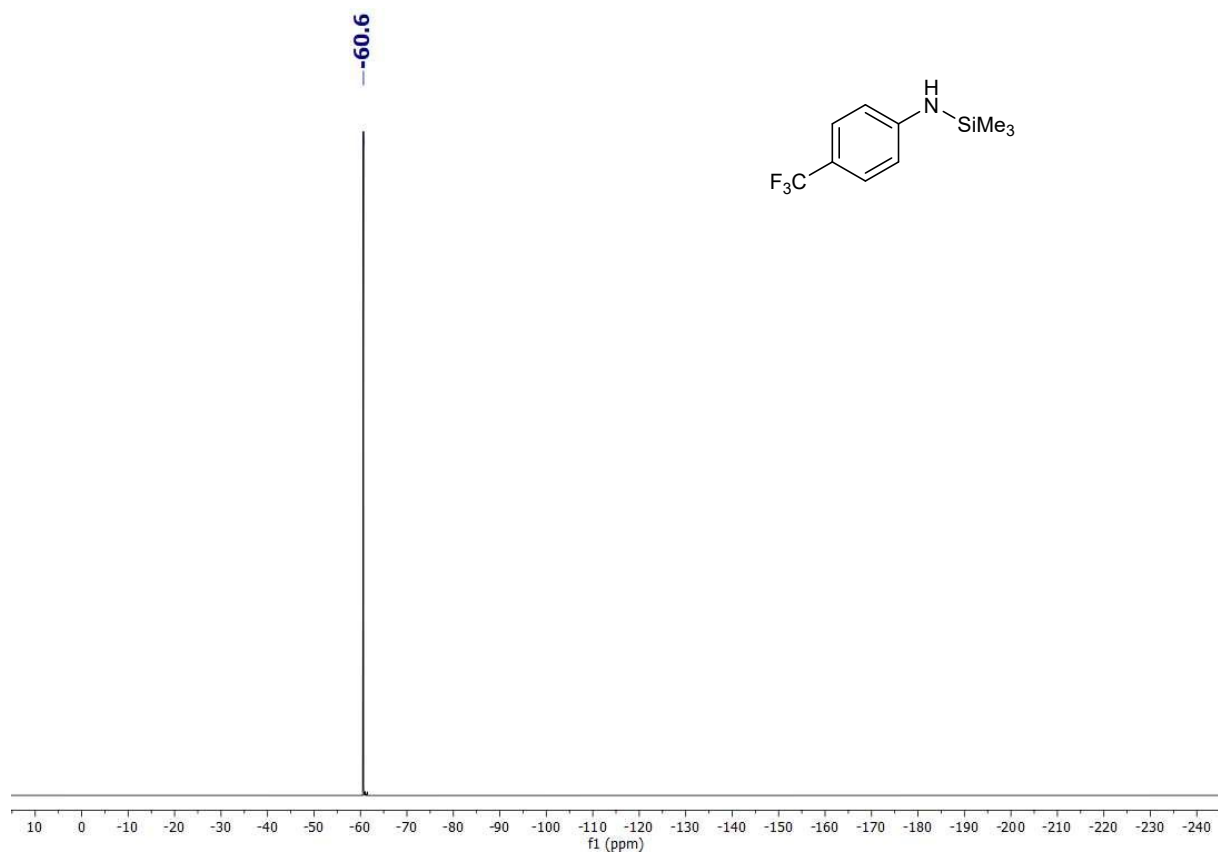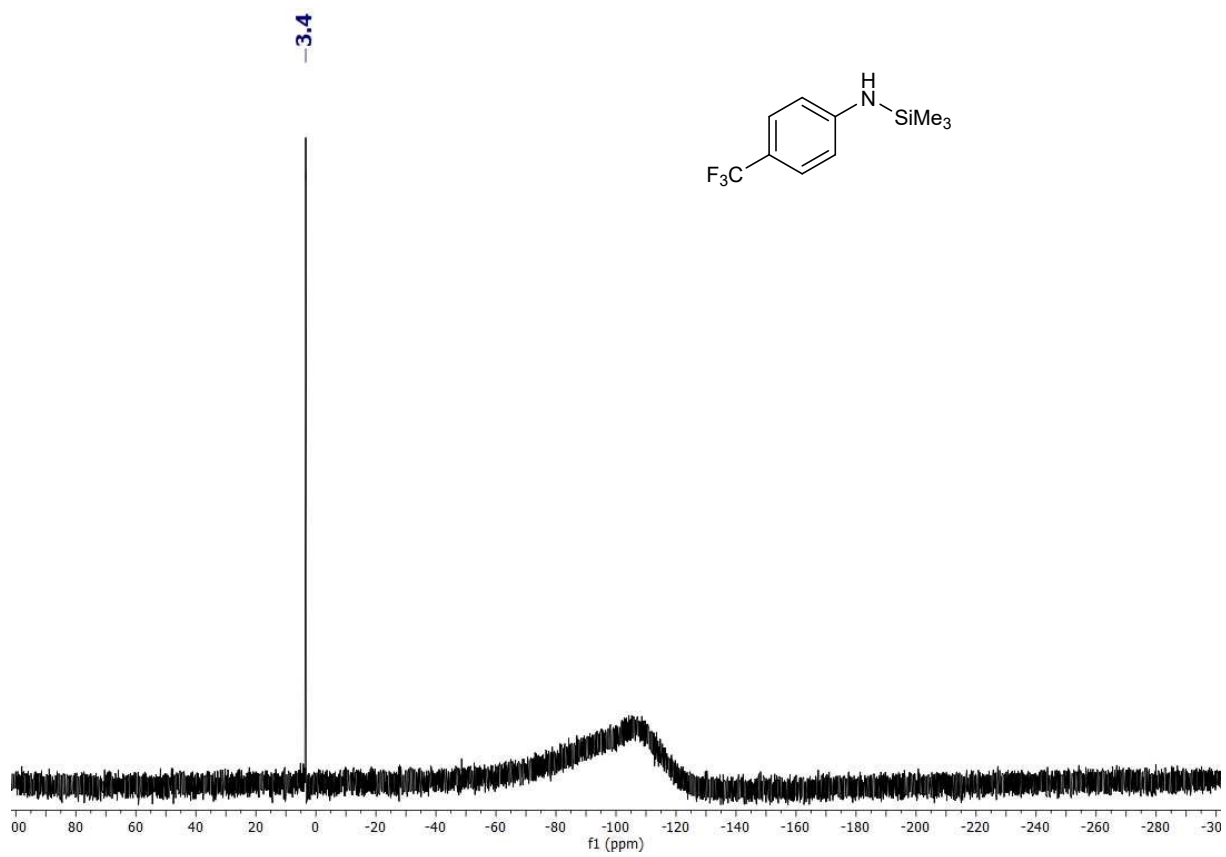

# N-(4-methoxyphenyl)-1,1,1-trimethylsilanamine (3n)

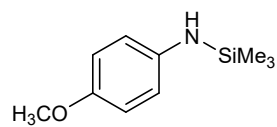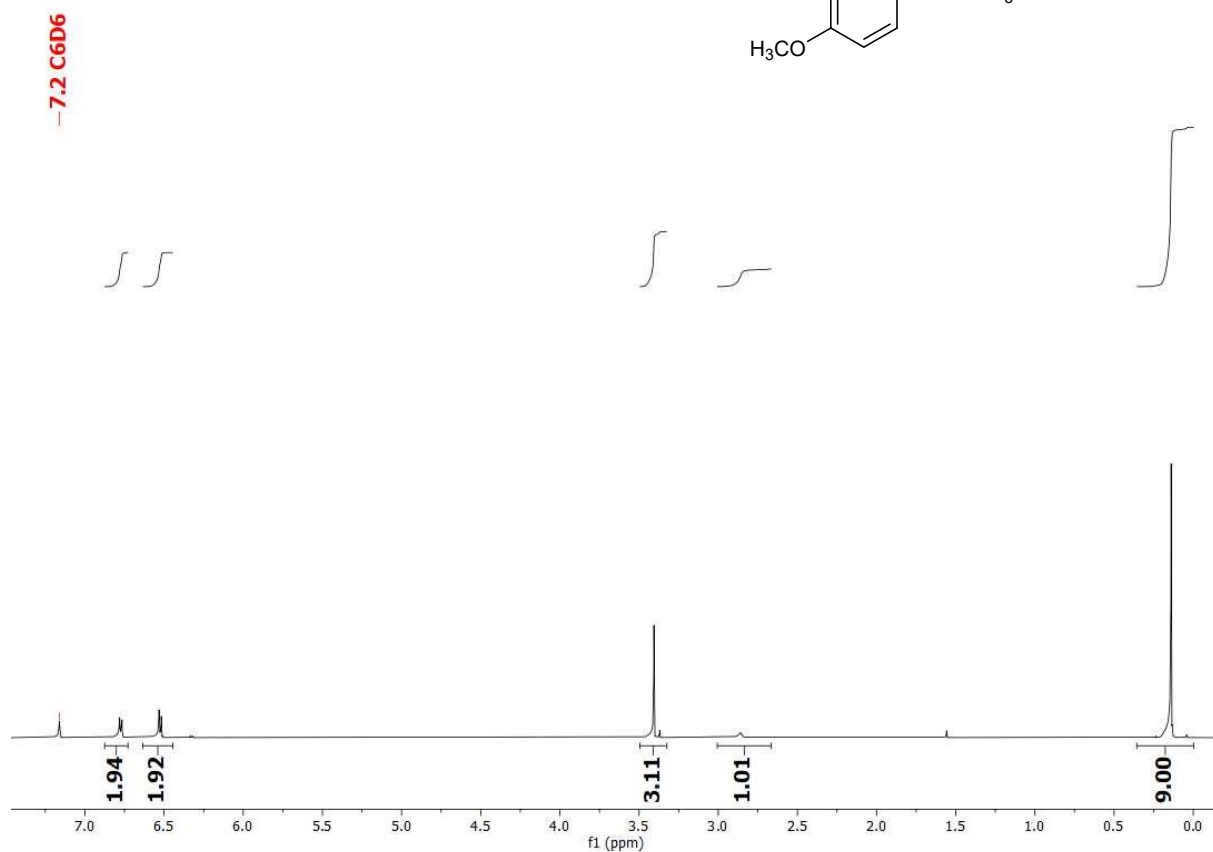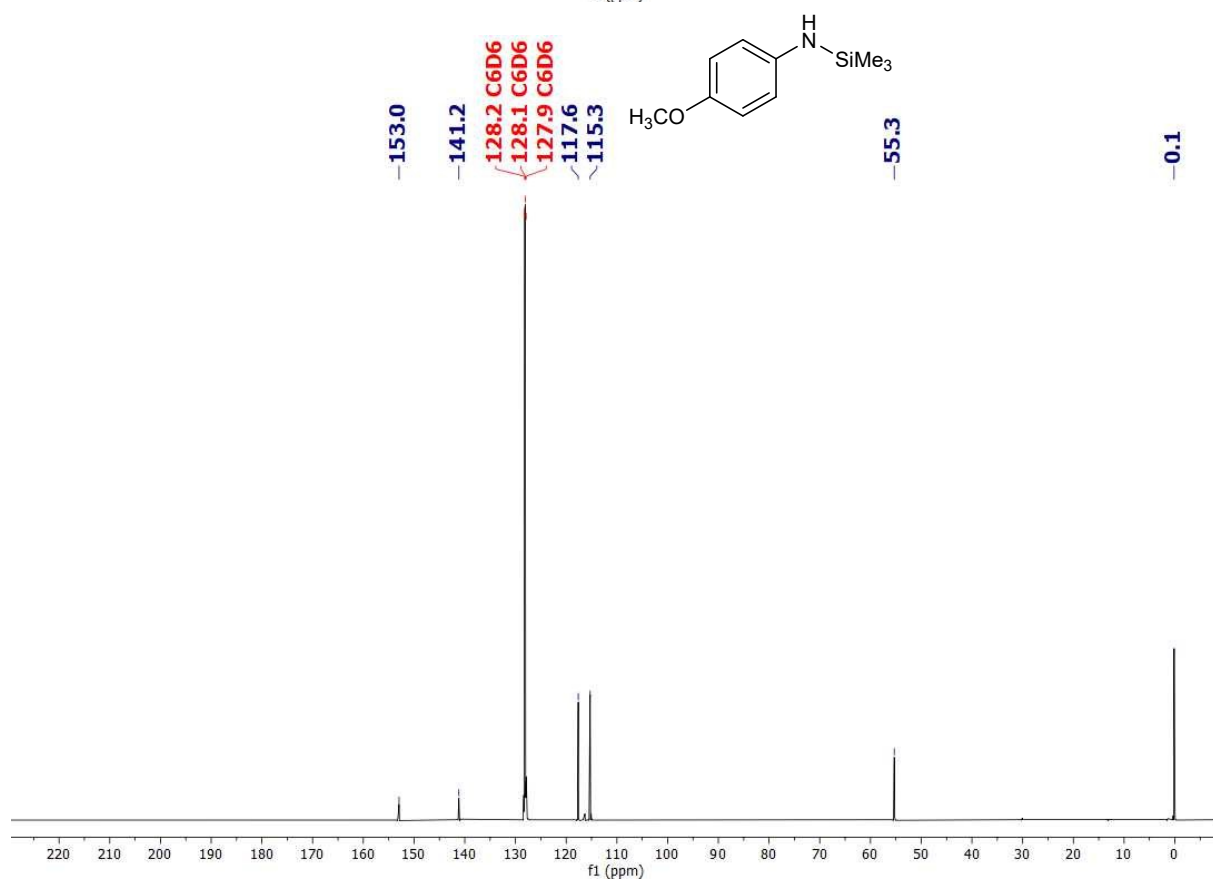

-1.4

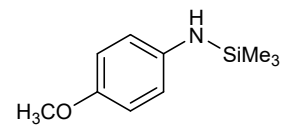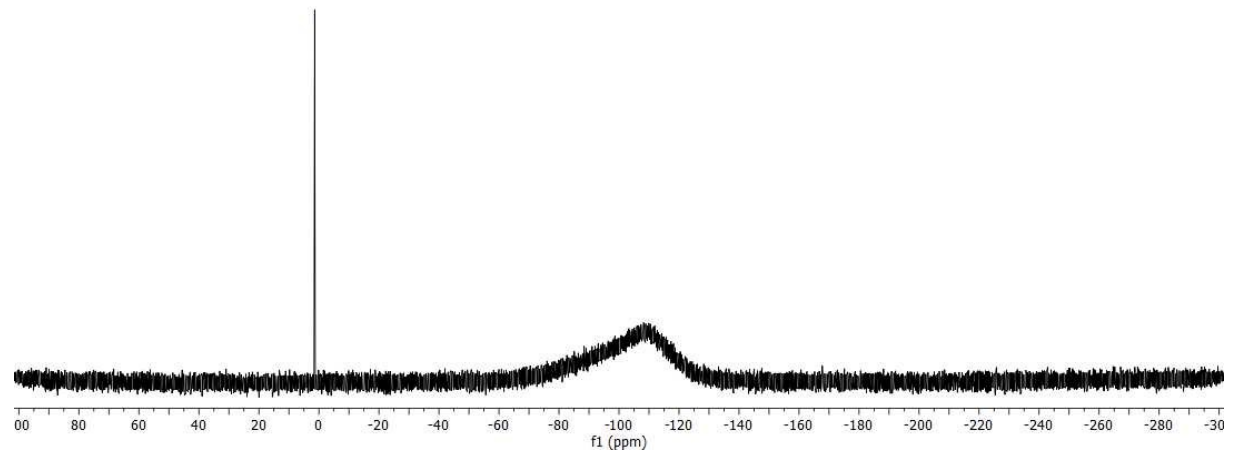

# 4-((Trimethylsilyl)oxy)aniline (3o)

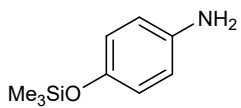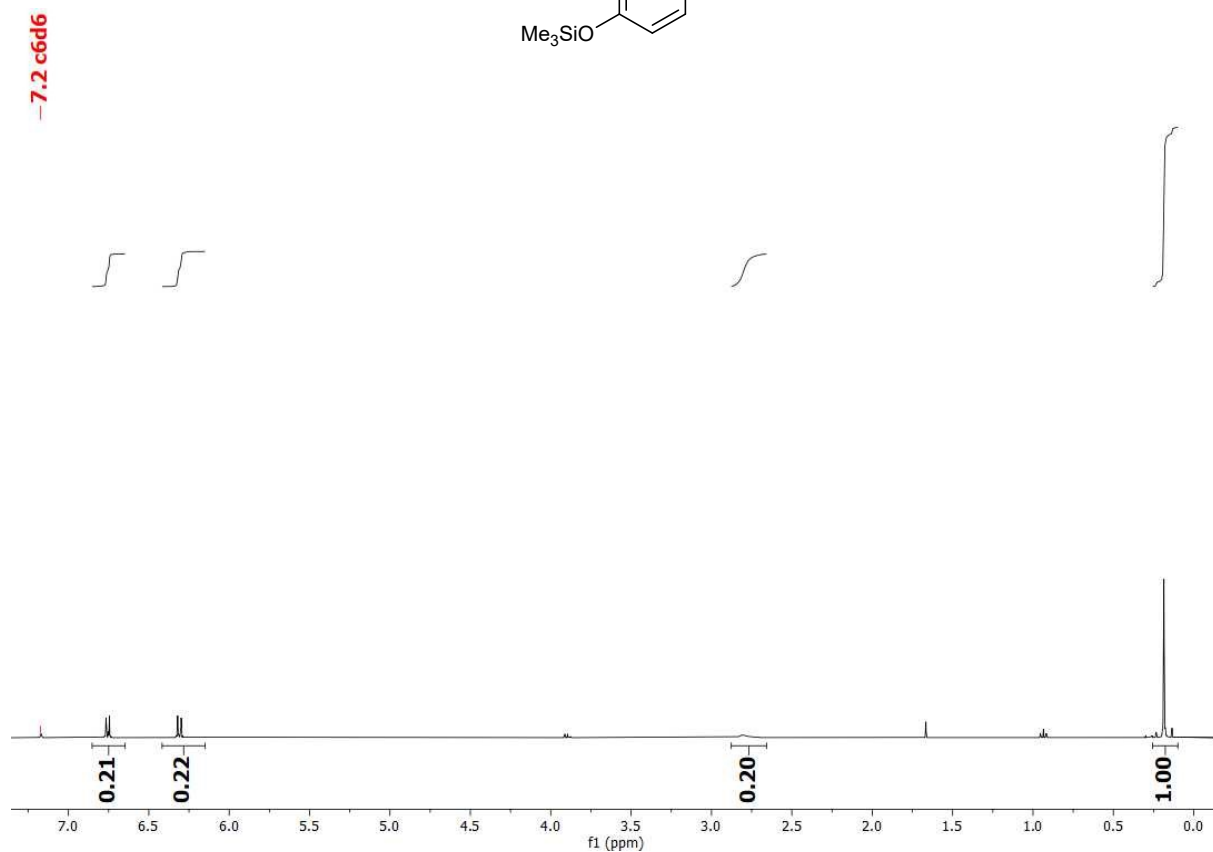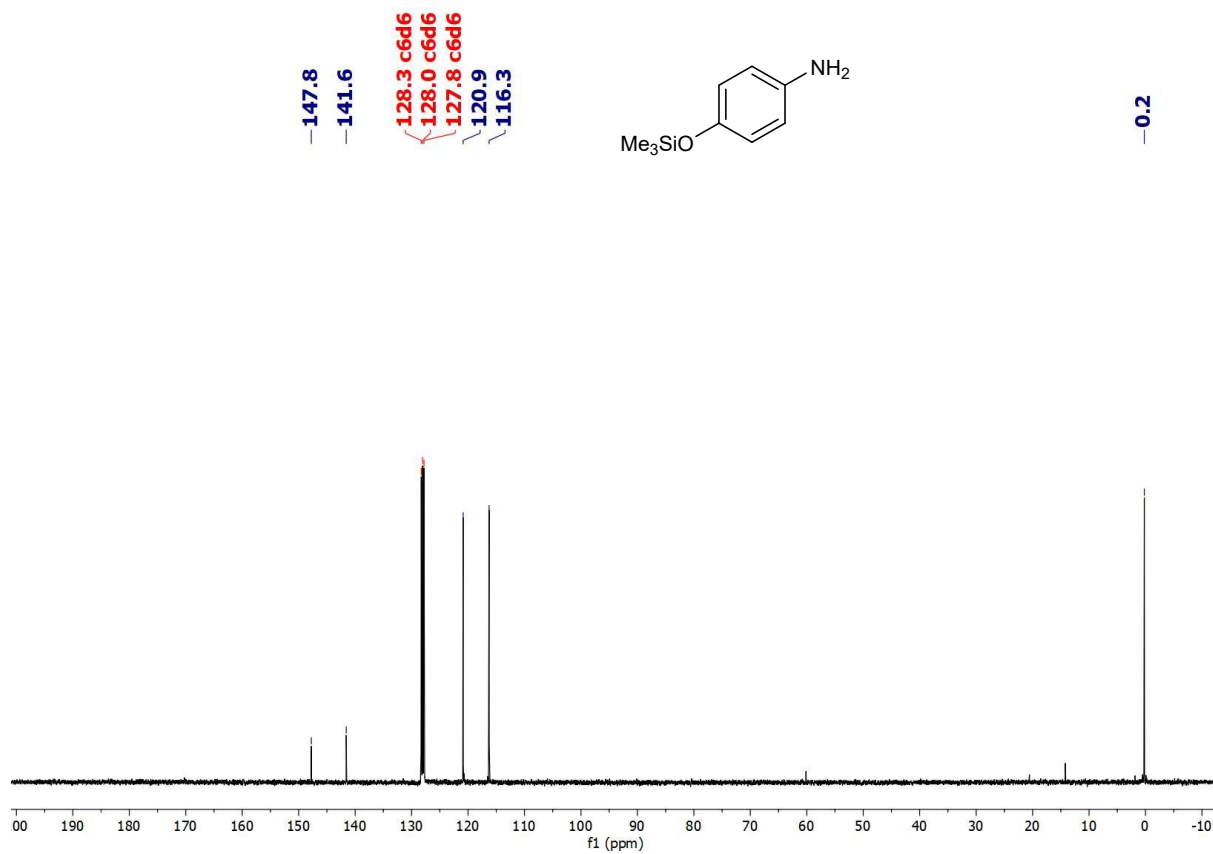

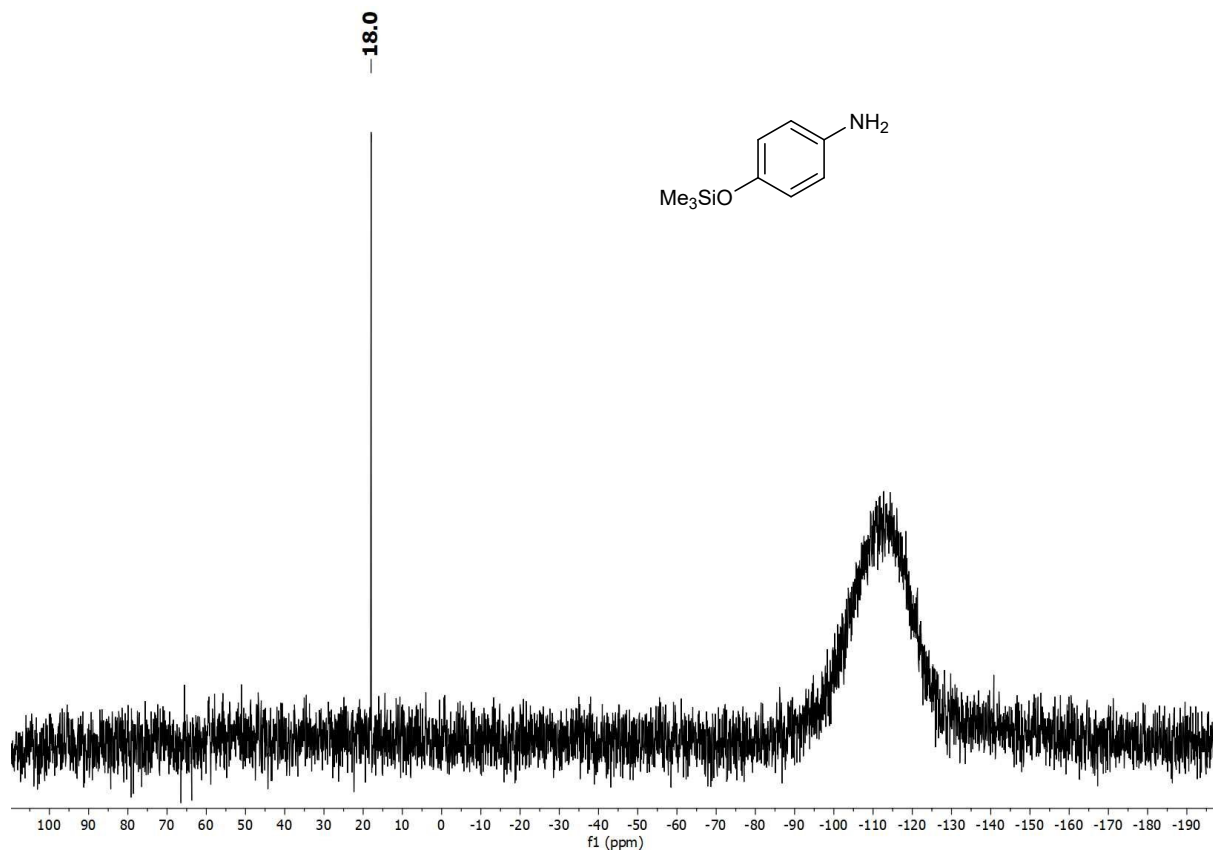

# 1,1,1-Trimethyl-N-(3-((trimethylsilyl)ethynyl)phenyl)silanamine (3p)

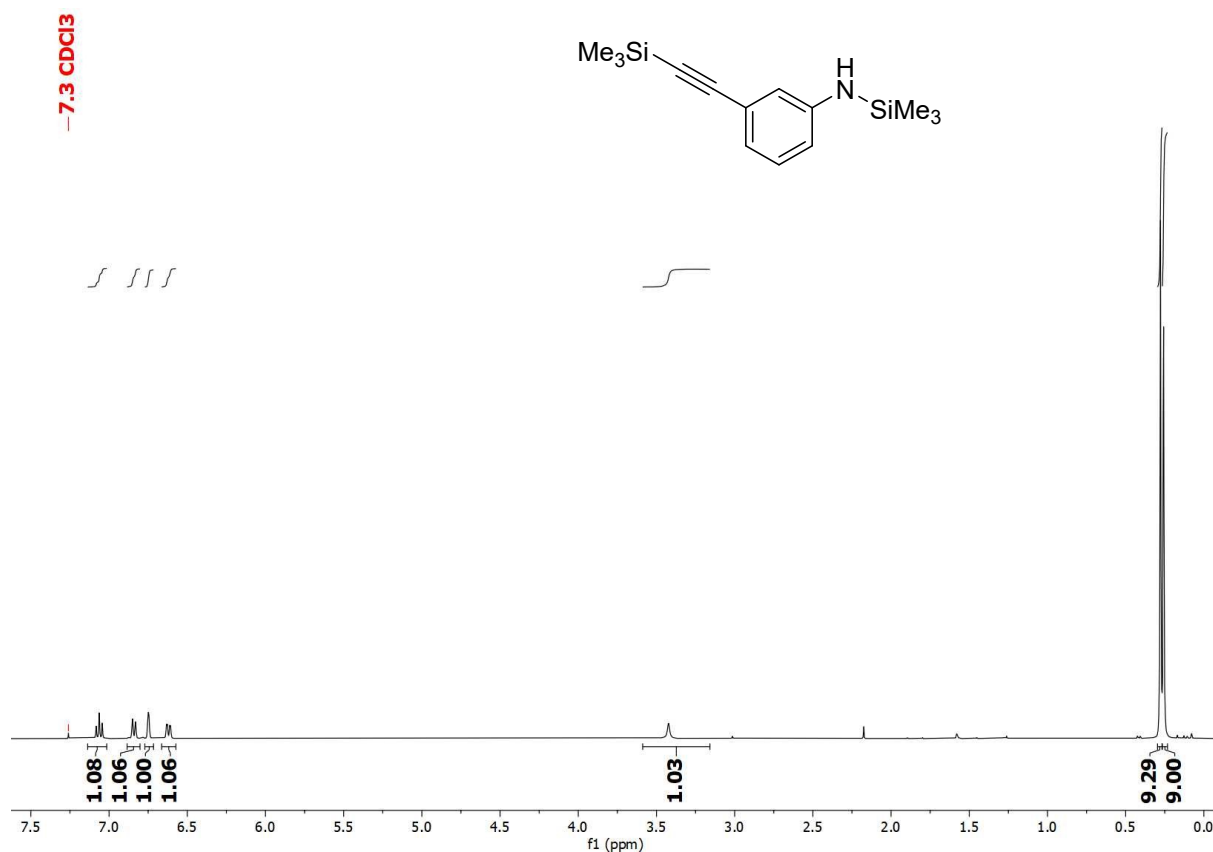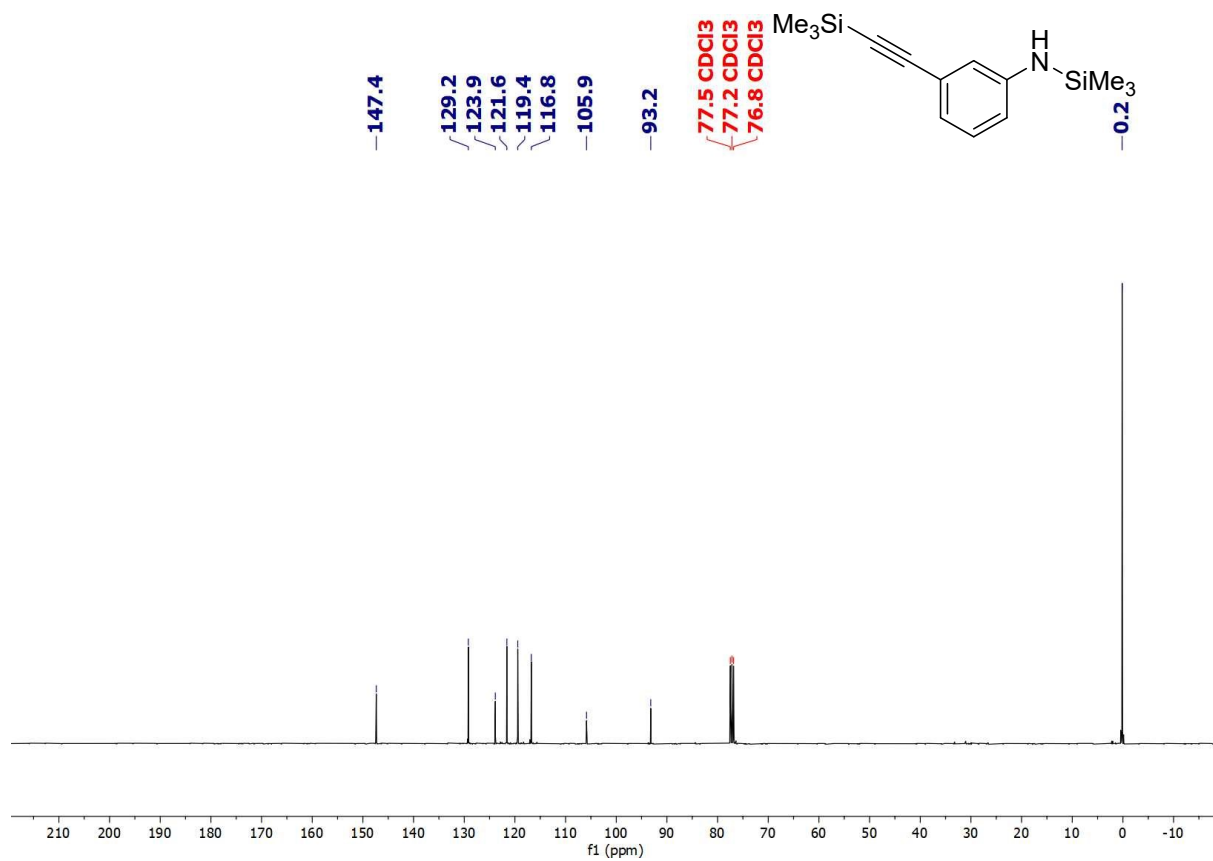

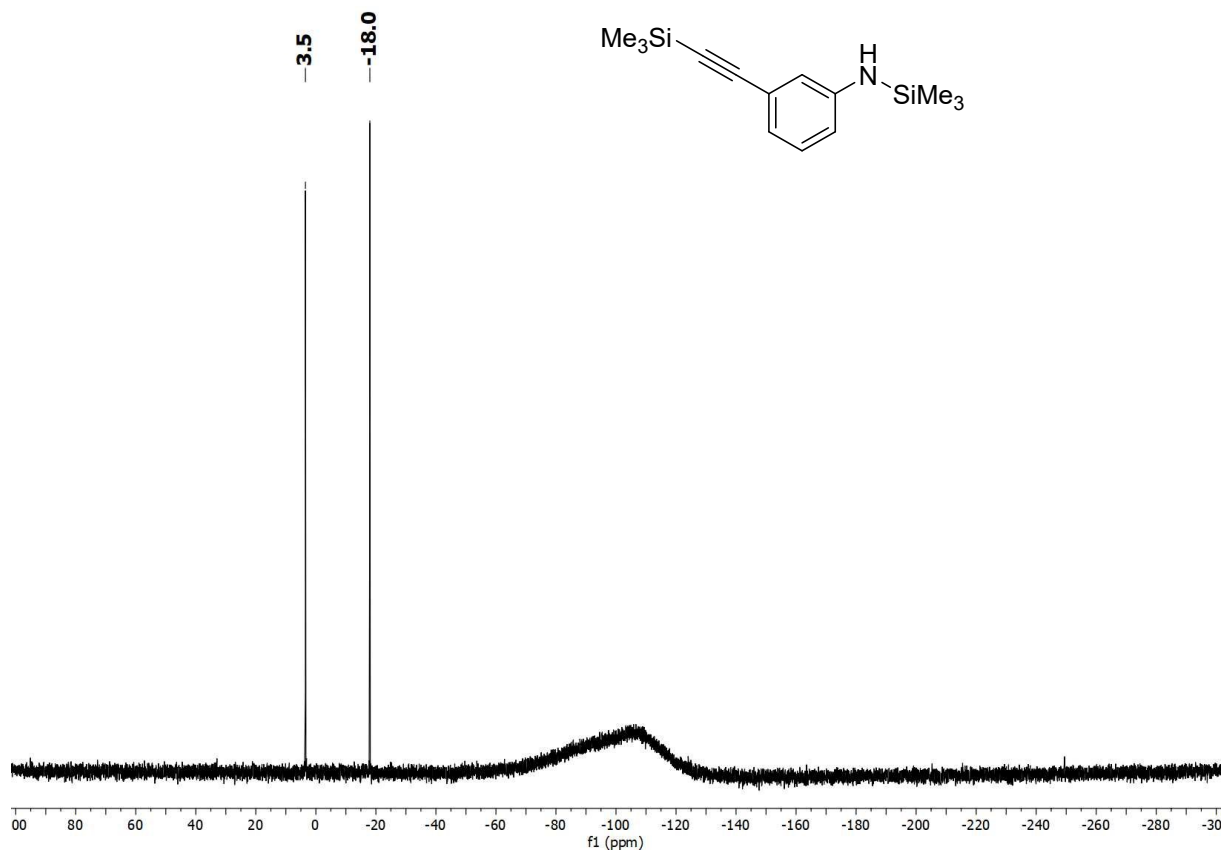



# 5-Methyl-N-(trimethylsilyl)pyridin-2-amine (5a)

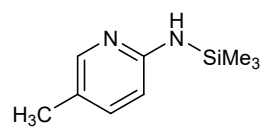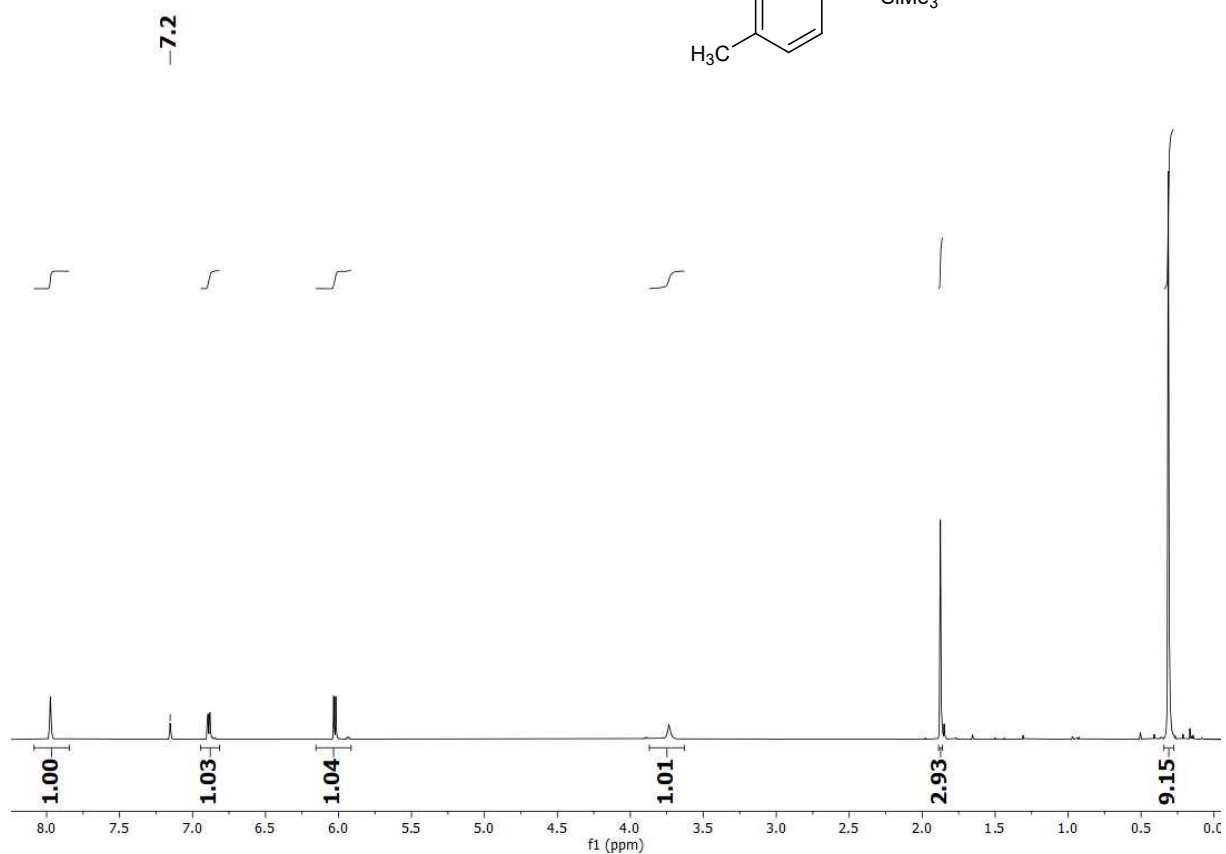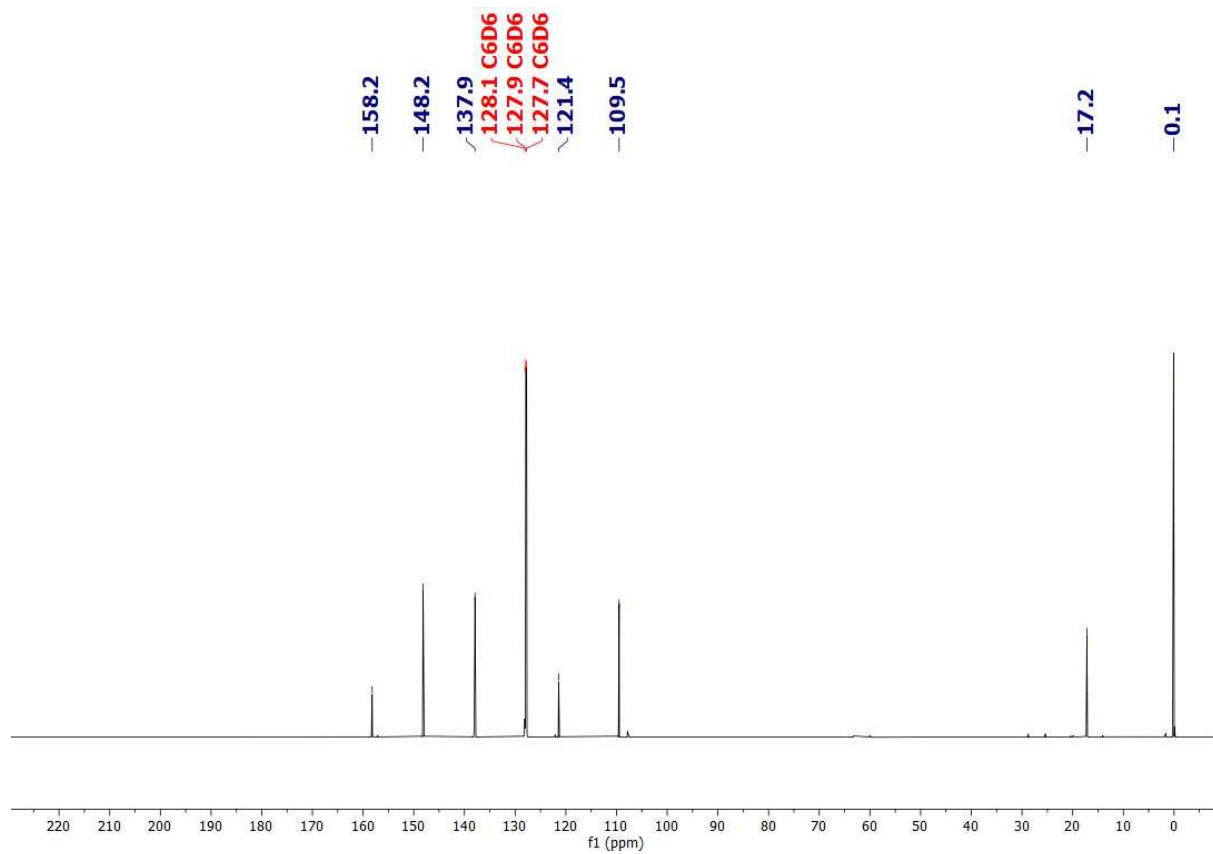

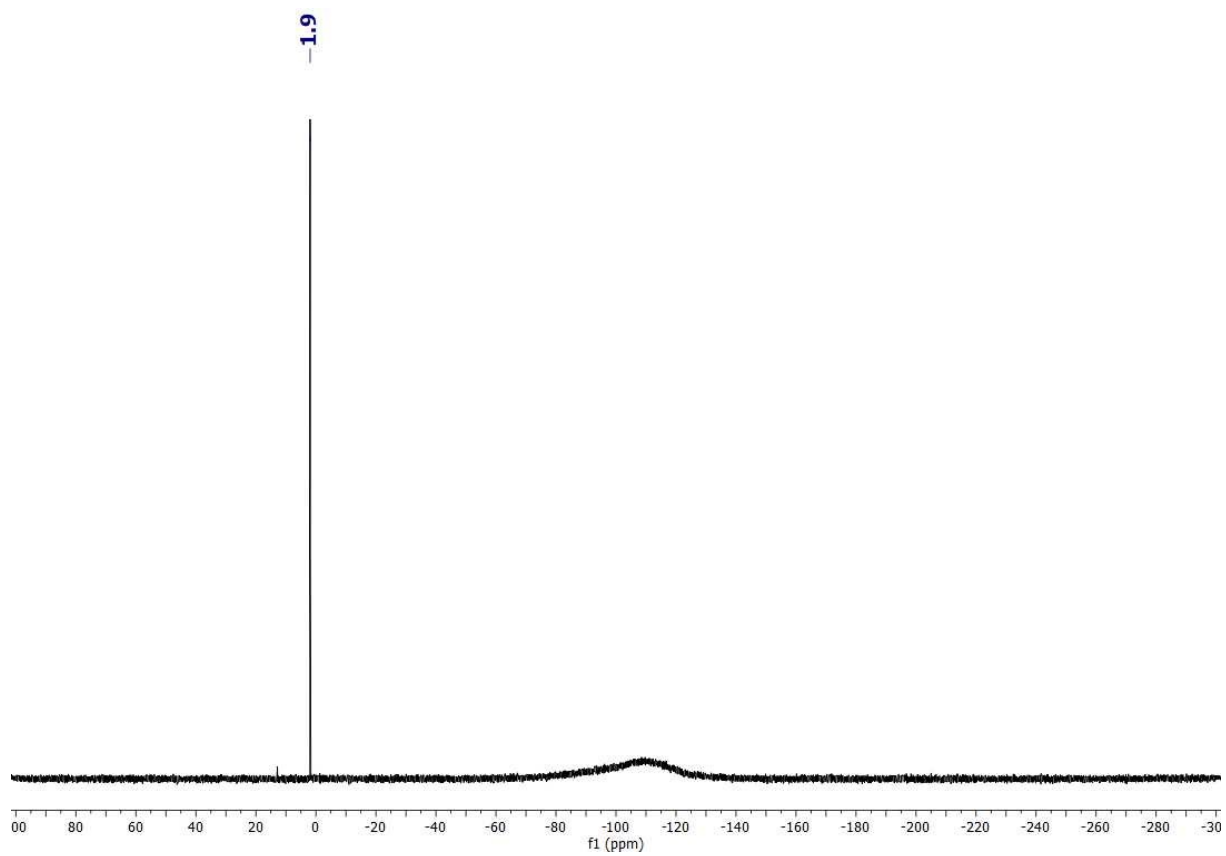

# 4,6-Dimethyl-N-(trimethylsilyl)pyridin-2-amine (5b)

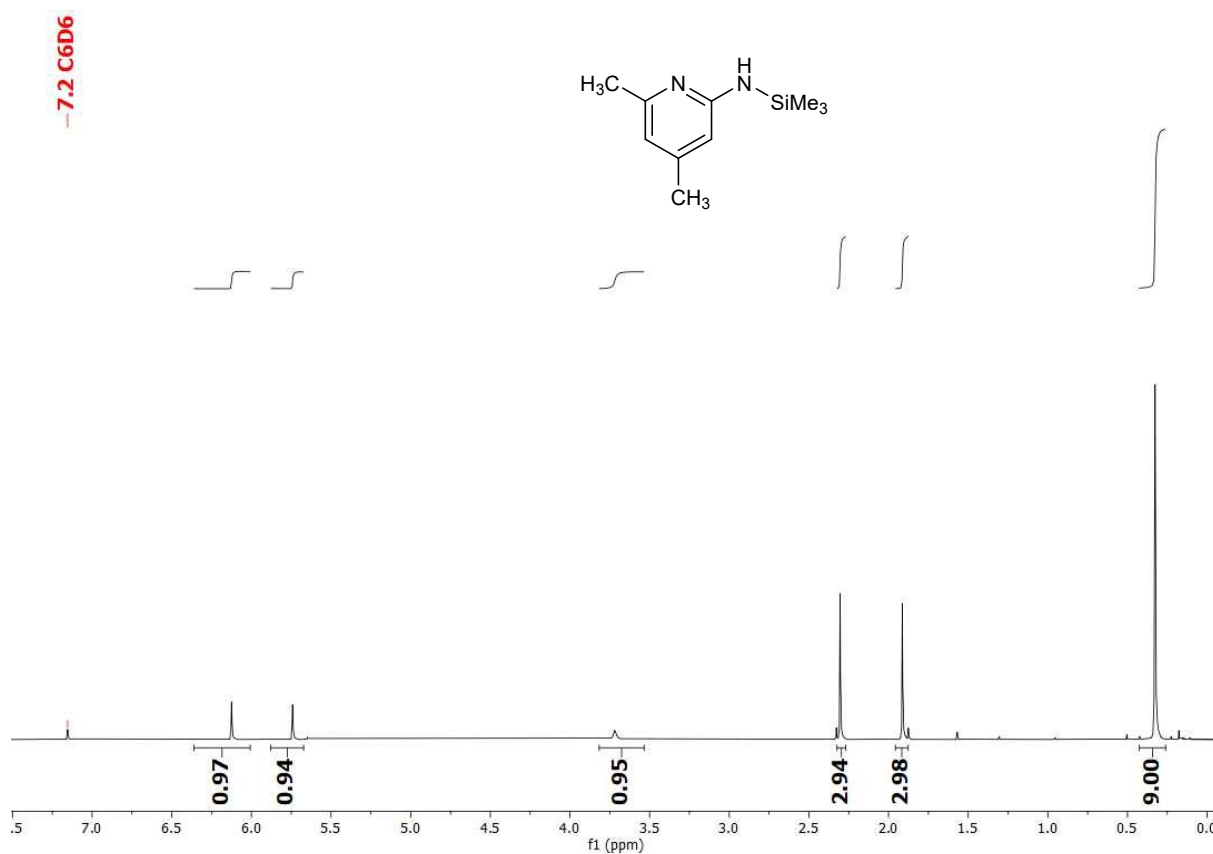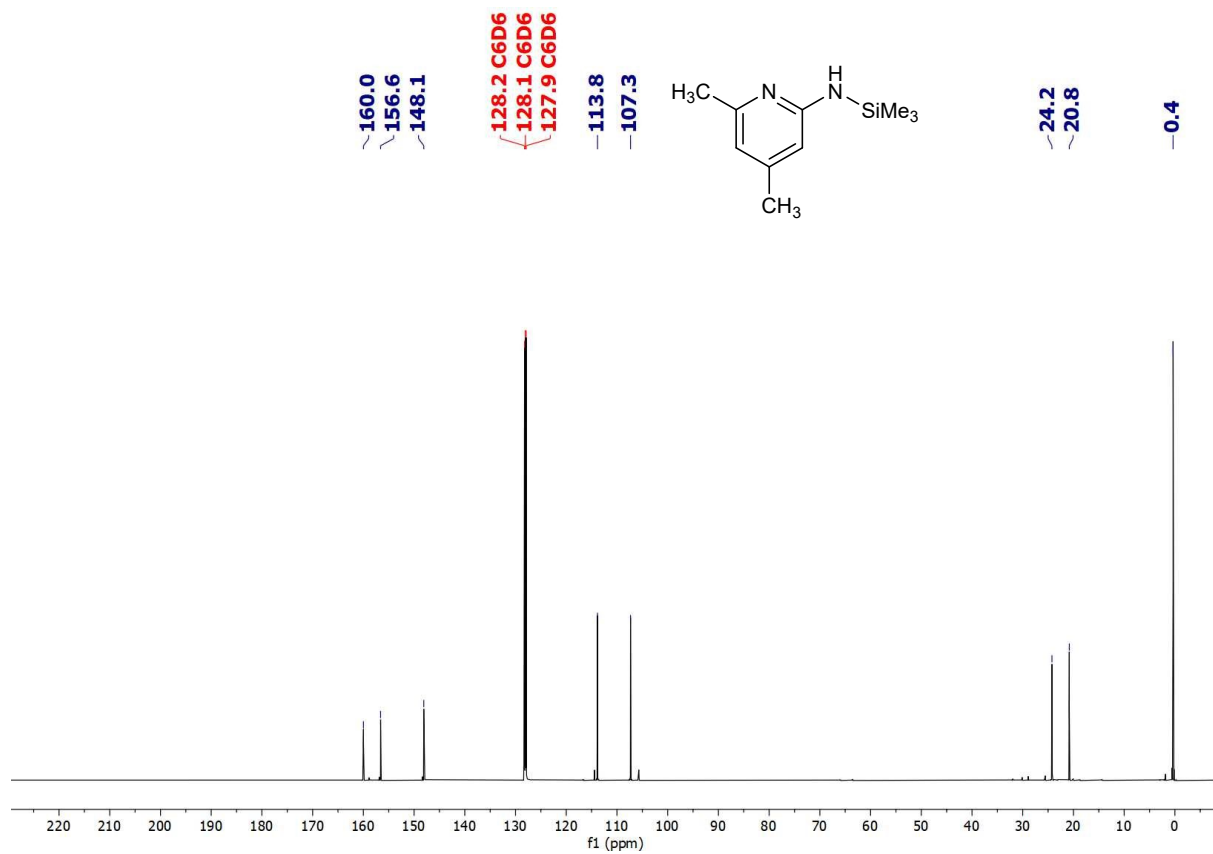

-1.7

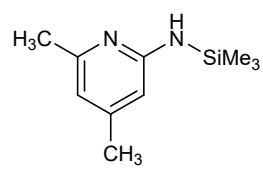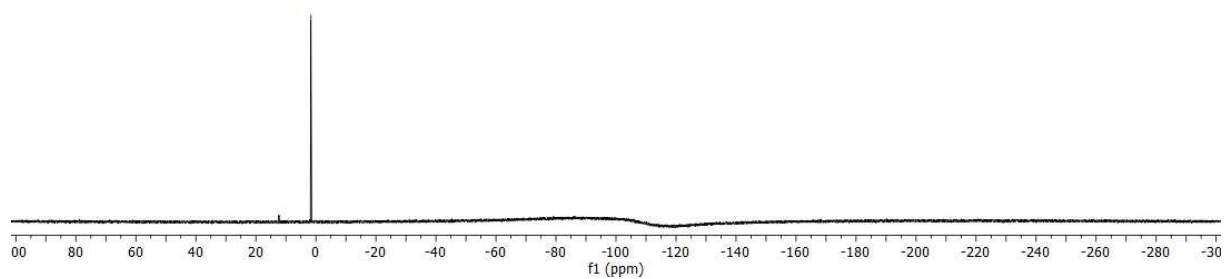

# N-(trimethylsilyl)pyrazin-2-amine (5c)

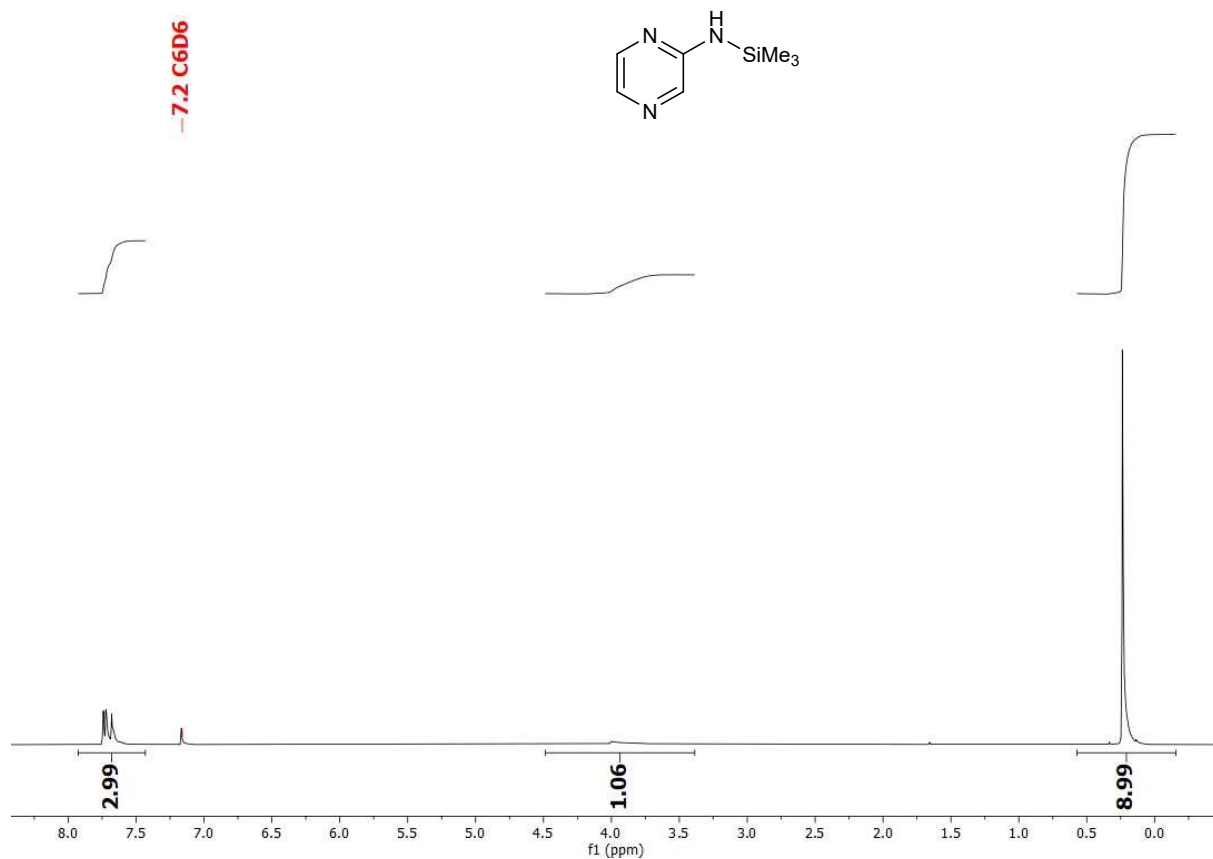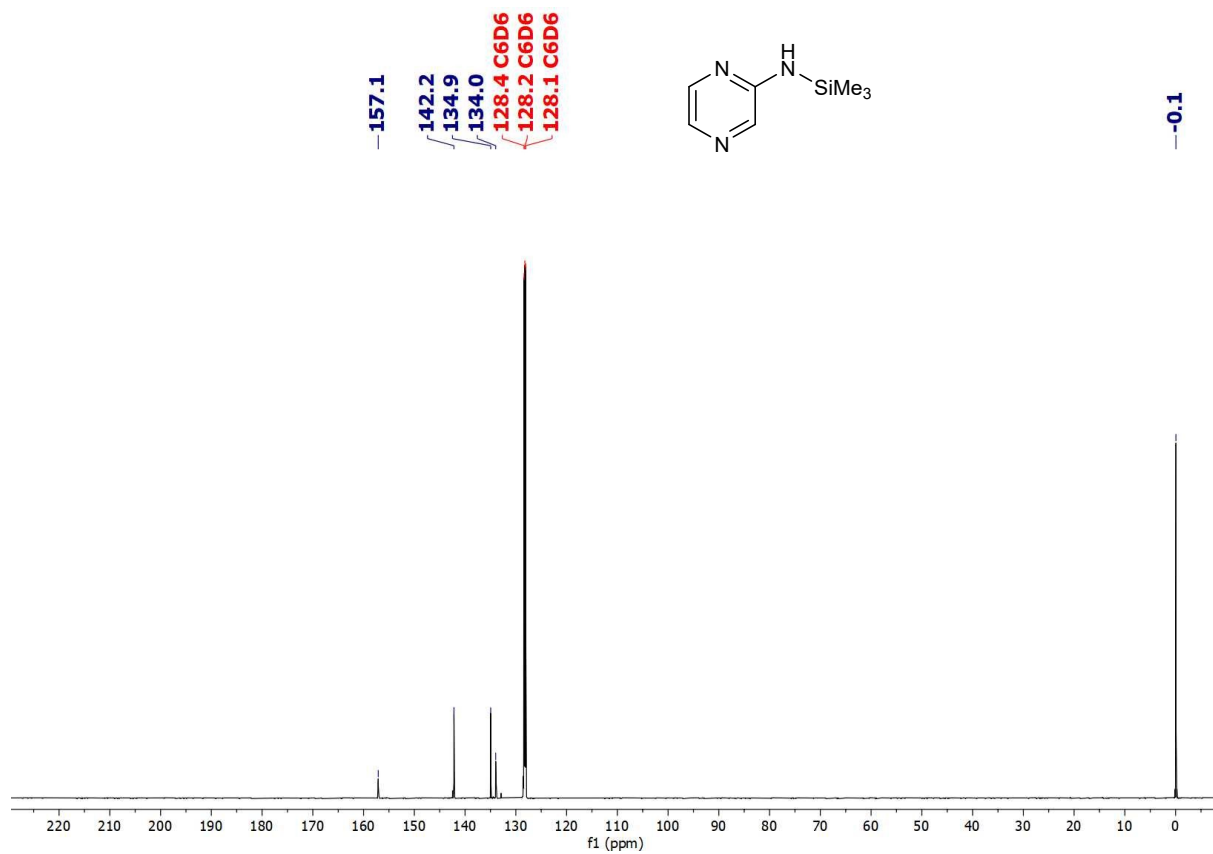

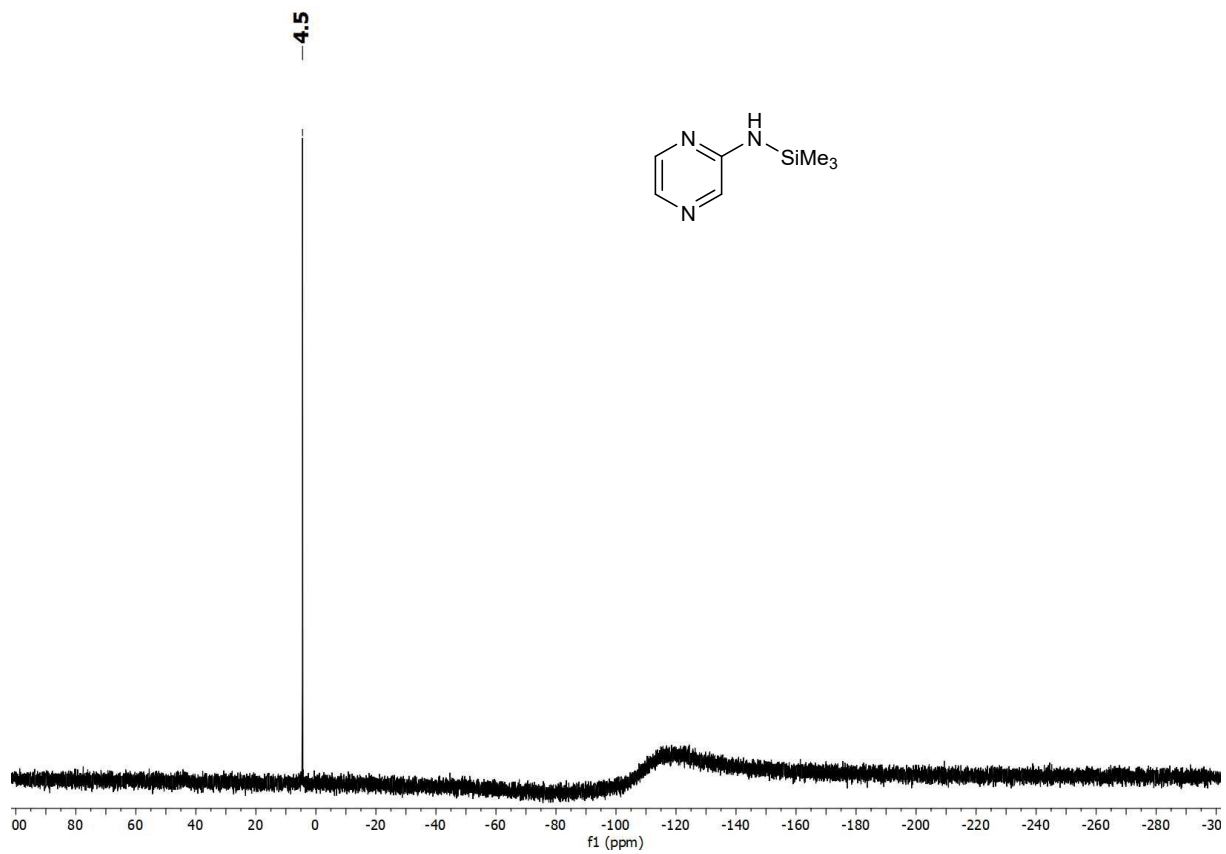

# N-(trimethylsilyl)pyrimidin-2-amine (5d)

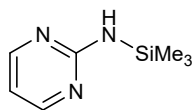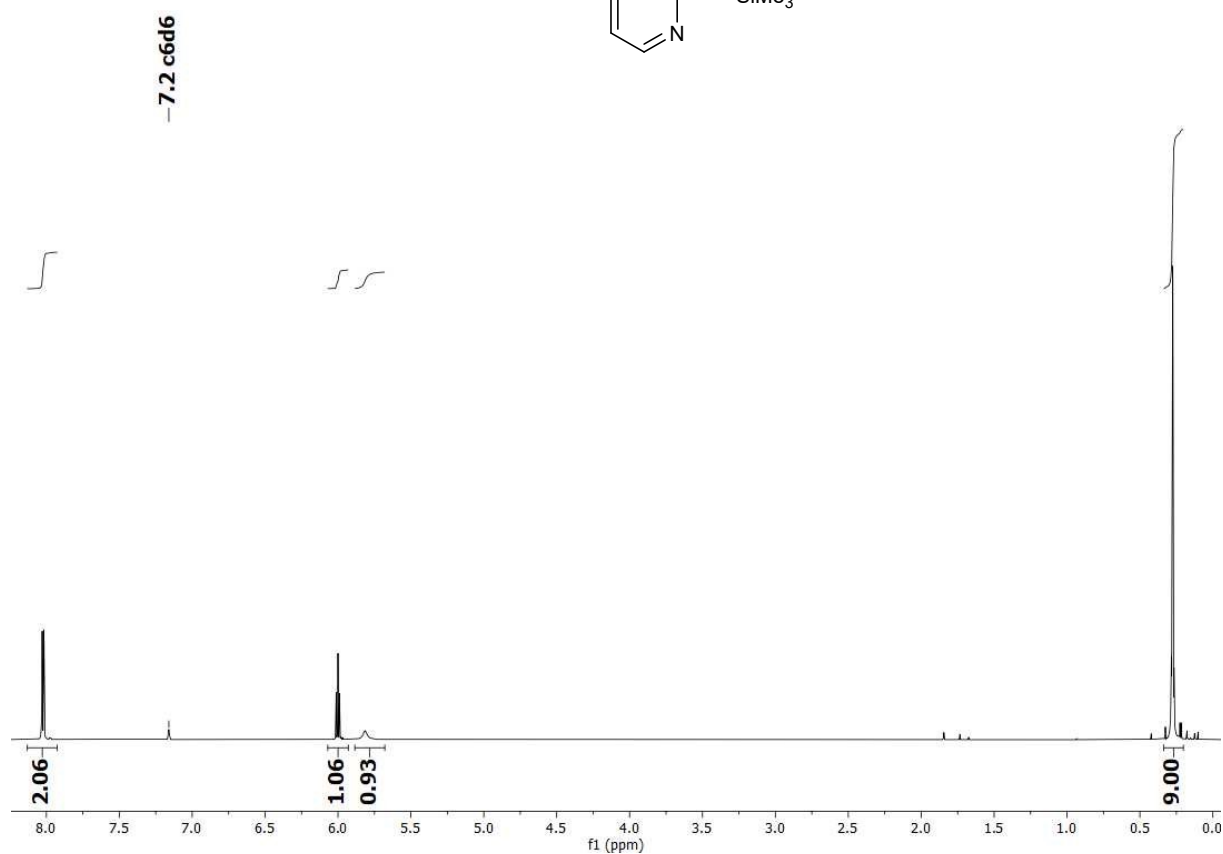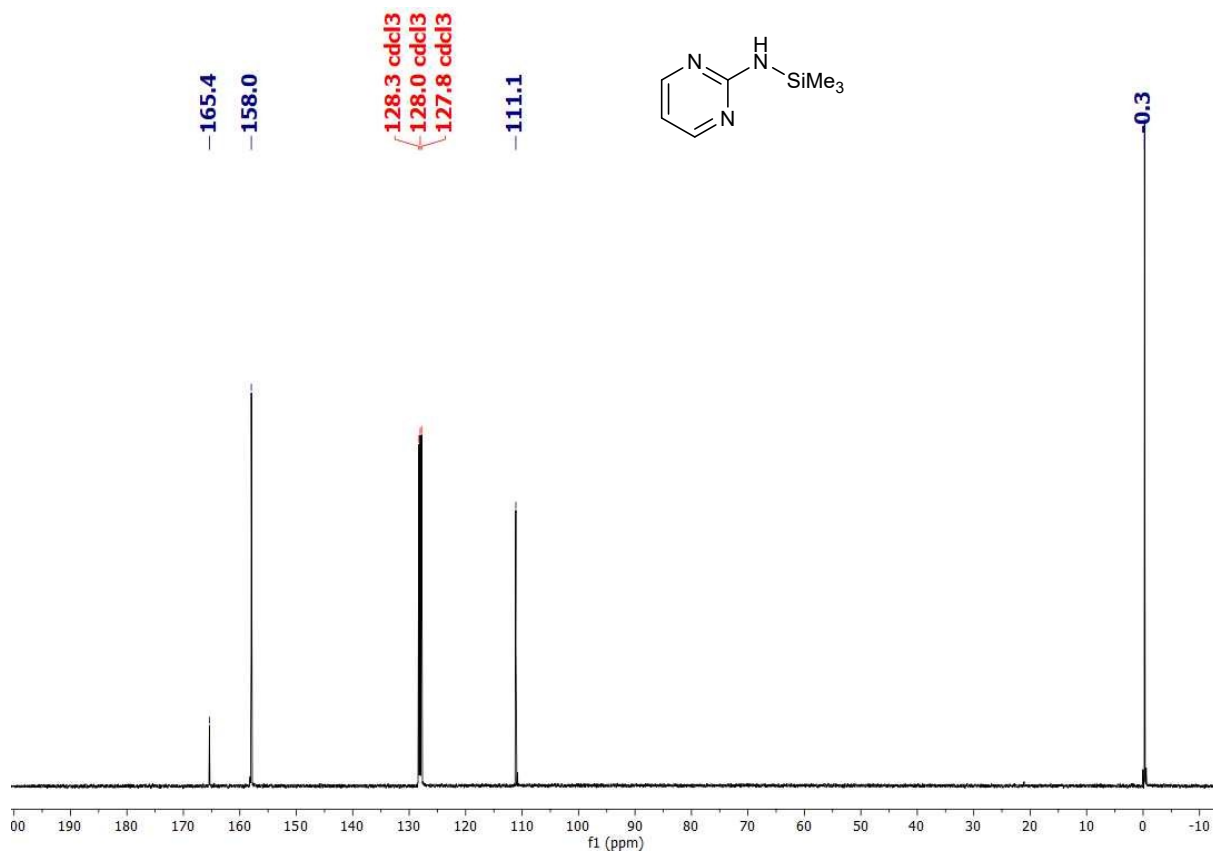

-3.9

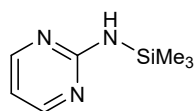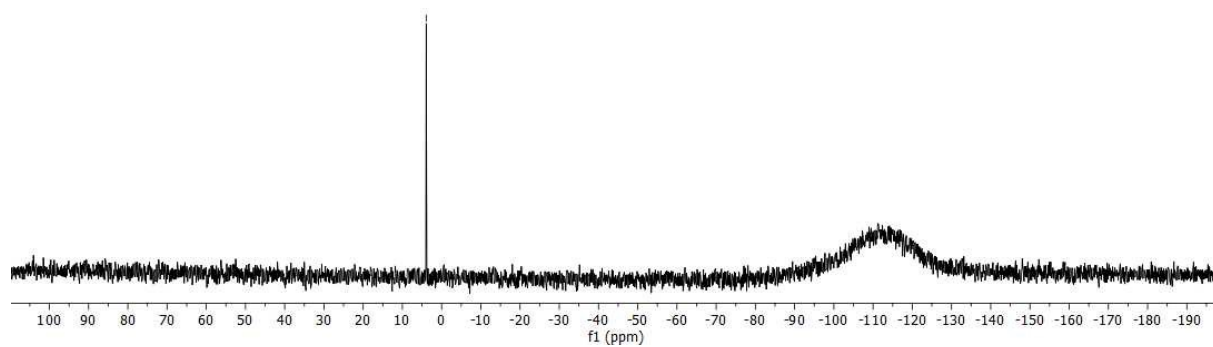



# N-(trimethylsilyl)quinolin-8-amine (5e)

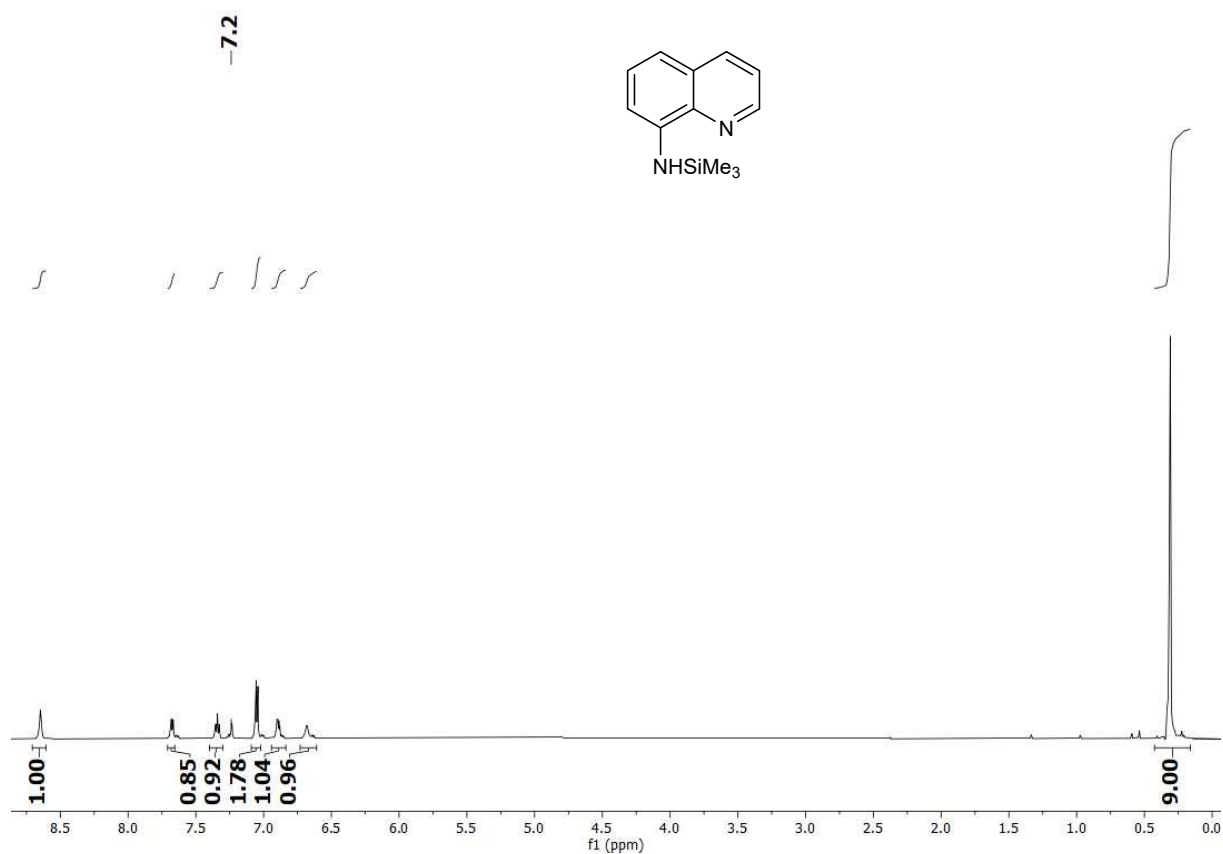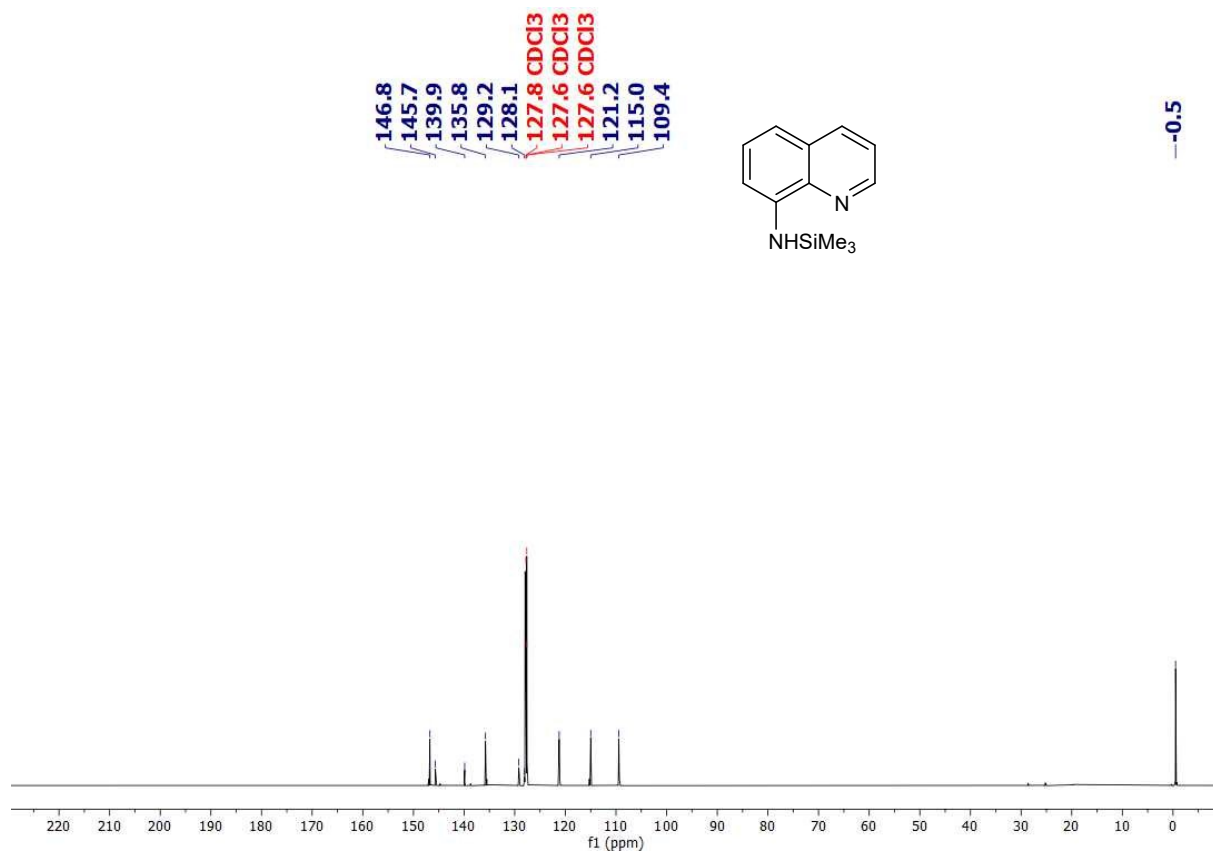

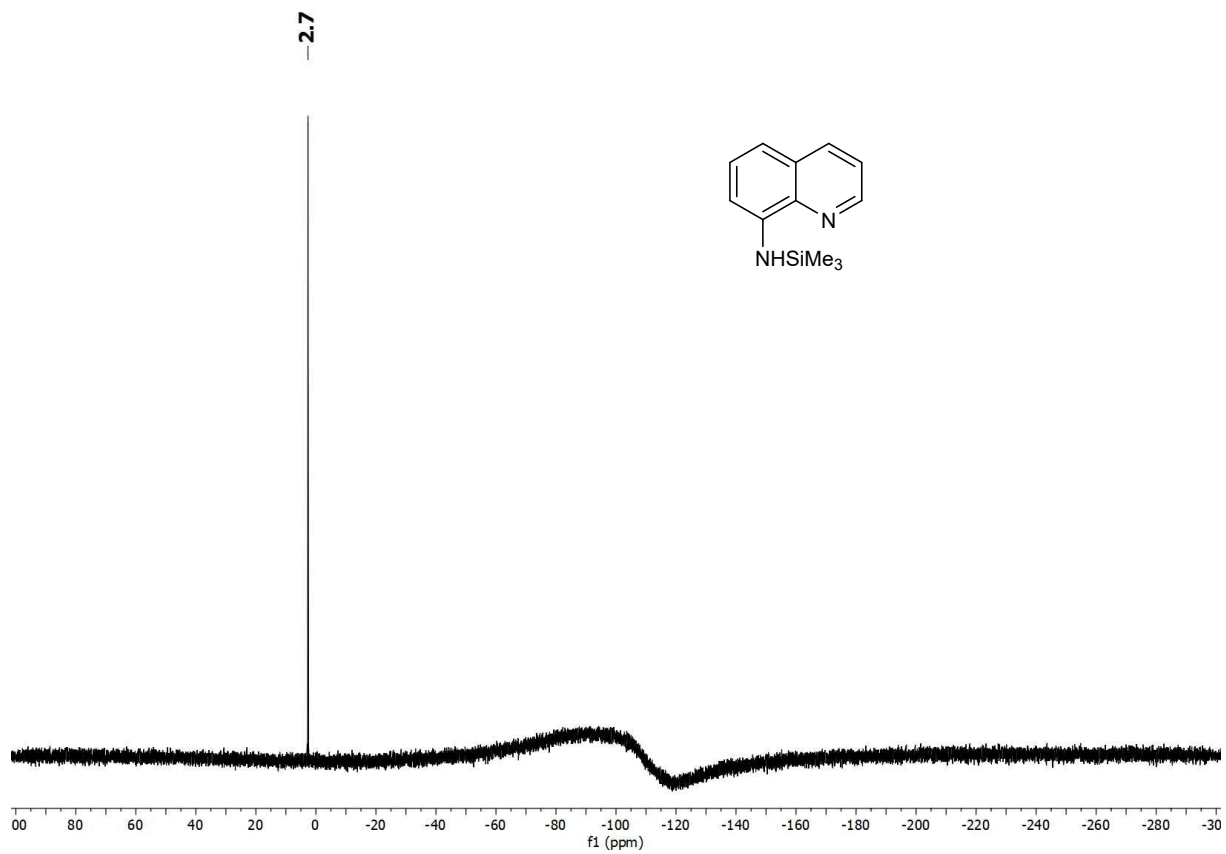

# N-(trimethylsilyl)benzo[d]thiazol-6-amine (5f)

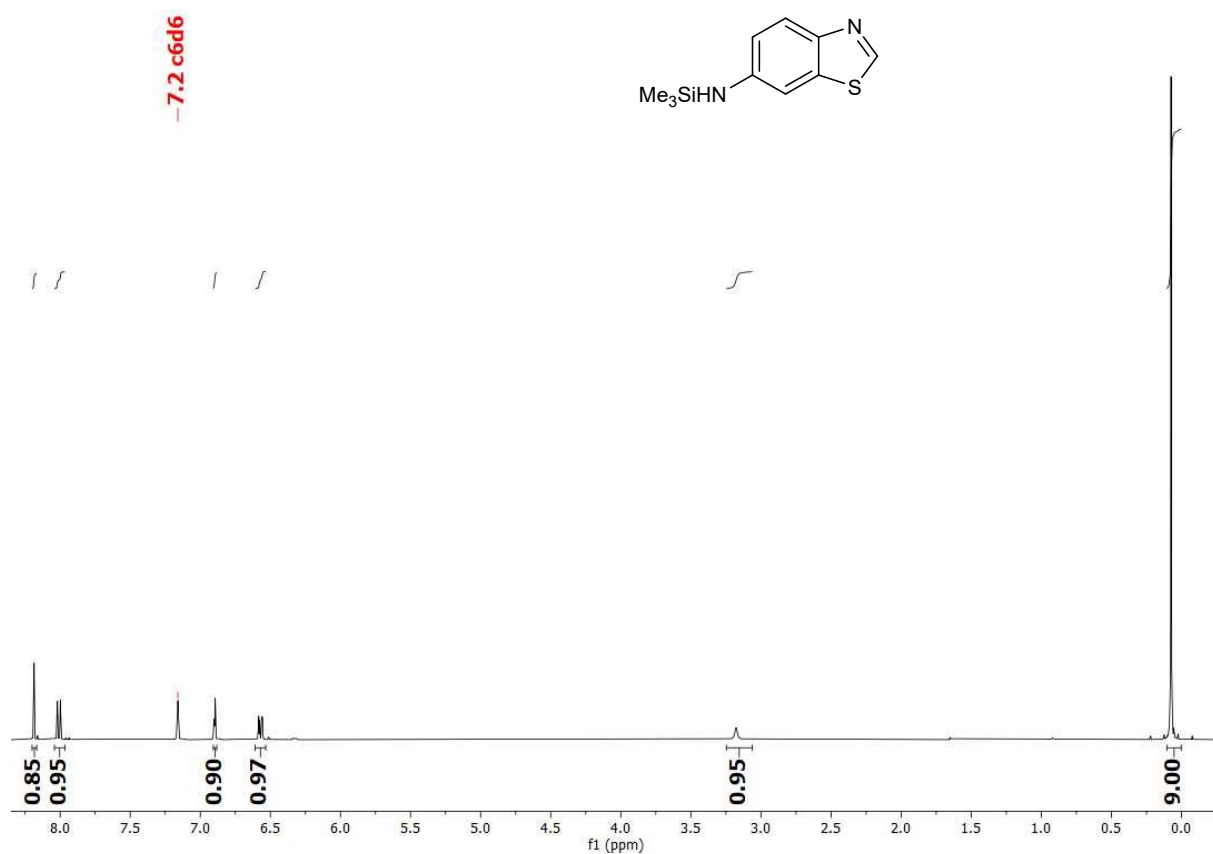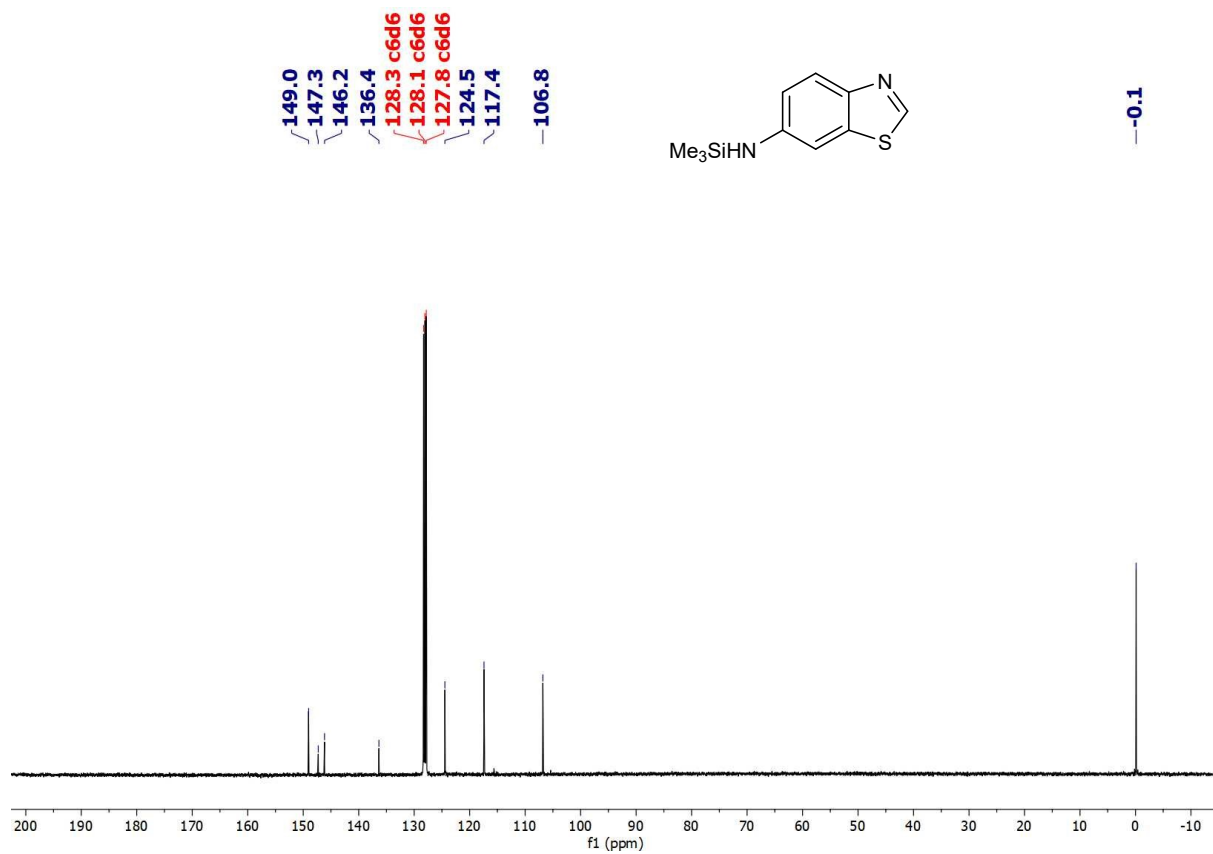

-3.2

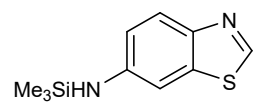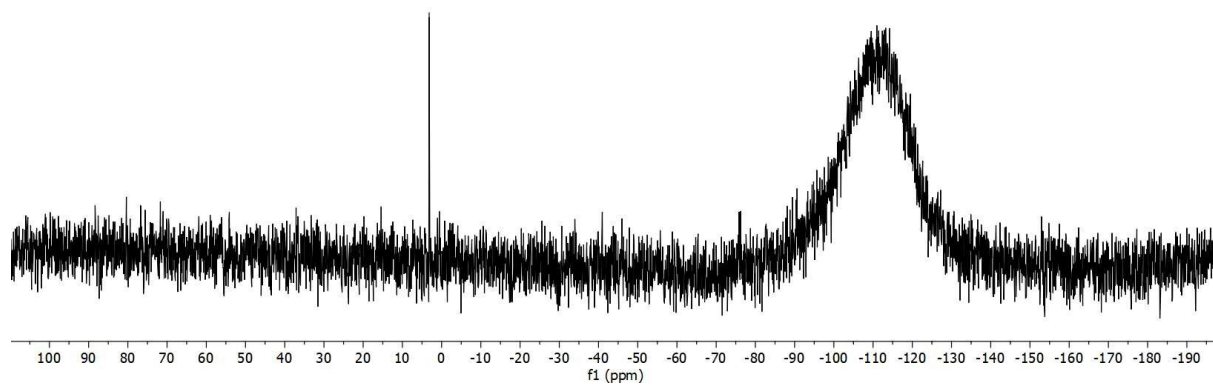

CONFIRMATION FOR A DEPROTONATION OF 4-CF<sub>3</sub>-ANILINE BY KHMDs

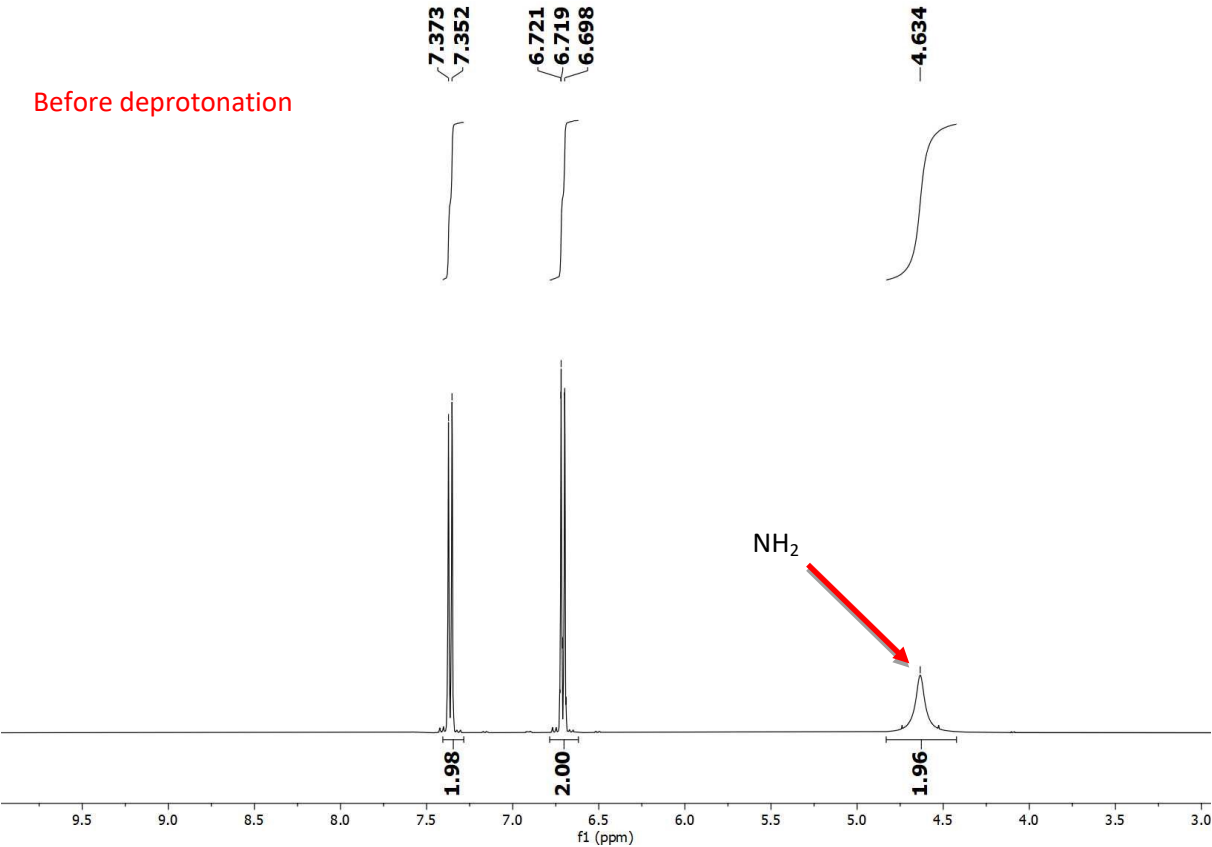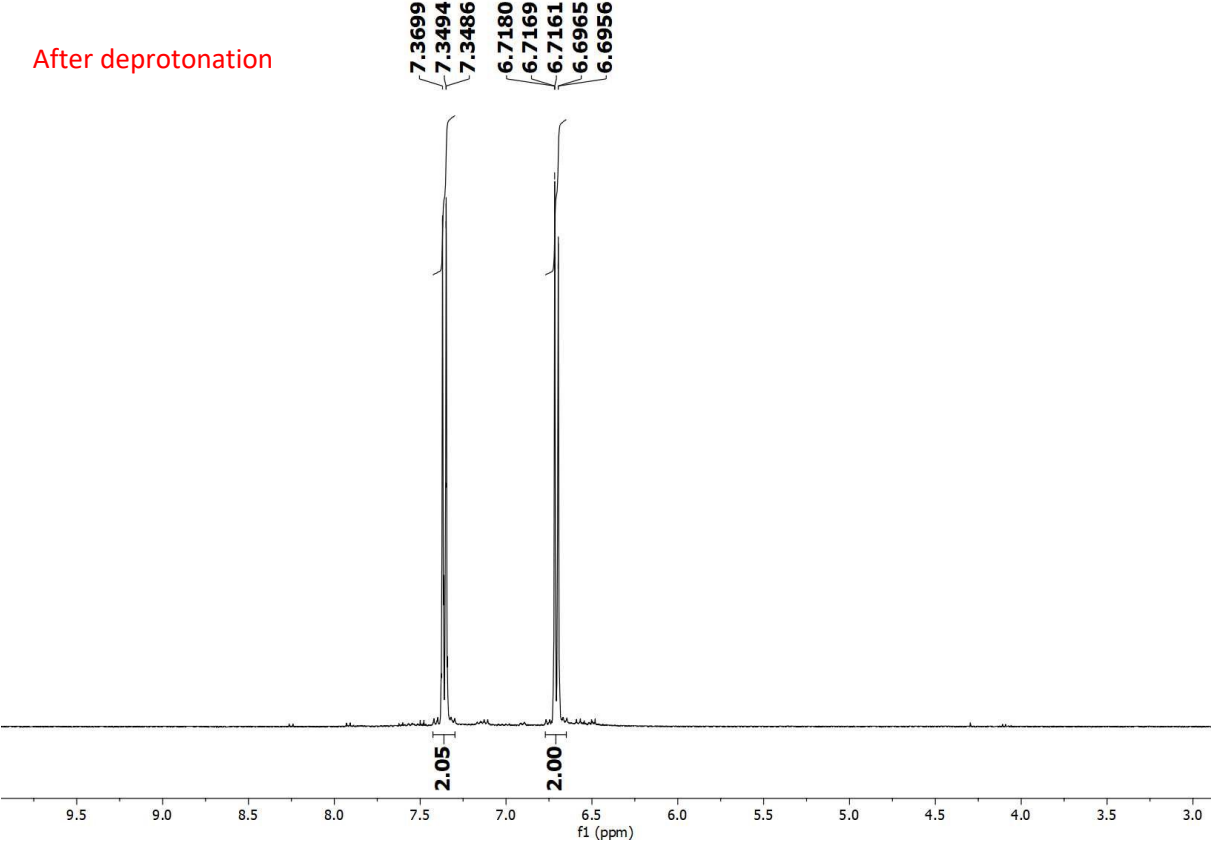

Supplement: d2cc04413g1.pdf [file d2cc04413g1.pdf]
